# Supplementary material
Source: publisher figshare collection journal article supplement (https://acs.figshare.com/ndownloader/files/4527679)
Supplement: Supplementary file 1 [file 4527679]

 
data_Cu2L2
_publ_contact_author_name        'Dr. Andrew L. Johnson'
_publ_contact_author_address     
;
Department of Chemistry,
University of Bath.
Claverton Down.
Bath.
BA2 7AY
United Kingdon
;
_publ_contact_author_email       a.l.johnson@bath.ac.uk
_publ_contact_author_phone       '+44 (0) 1225 384467'
_publ_contact_author_fax         '+44 (0) 1225 386231'
_publ_requested_journal       'Inorganic Chemistry'


_publ_section_title		
;
Synthesis and Structures of Group 11 Metal
Triazenide Complexes: Ligand Supported 
Metallophilic Interactions 
;
 
loop_
_publ_author_name
_publ_author_address
'Johnson, Andrew L.'
;
Department of Chemistry,
University of Bath.
Claverton Down.
Bath.
BA2 7AY
United Kingdon
;
'Wilcocks, Alexander M.'
;
Department of Chemistry,
University of Bath.
Claverton Down.
Bath.
BA2 7AY
United Kingdon
;
'Richards, Stephen P.'
;
Department of Chemistry,
University of Bath.
Claverton Down.
Bath.
BA2 7AY
United Kingdon
;


_audit_creation_method           SHELXL-97
_chemical_name_systematic        
; 
 ? 
;
_chemical_name_common            ?
_chemical_melting_point          ?
_chemical_formula_moiety         ?
_chemical_formula_sum            'C48 H69 Cu2 N6'
_chemical_formula_weight         857.17

loop_
_atom_type_symbol
_atom_type_description
_atom_type_scat_dispersion_real
_atom_type_scat_dispersion_imag
_atom_type_scat_source
C C 0.0033 0.0016 'International Tables Vol C Tables 4.2.6.8 and 6.1.1.4'
H H 0.0000 0.0000 'International Tables Vol C Tables 4.2.6.8 and 6.1.1.4'
N N 0.0061 0.0033 'International Tables Vol C Tables 4.2.6.8 and 6.1.1.4'
Cu Cu 0.3201 1.2651 'International Tables Vol C Tables 4.2.6.8 and 6.1.1.4'

_symmetry_cell_setting           Monoclinic
_symmetry_space_group_name_H-M   C2/c

loop_
_symmetry_equiv_pos_as_xyz
'x, y, z'
'-x, y, -z+1/2'
'x+1/2, y+1/2, z'
'-x+1/2, y+1/2, -z+1/2'
'-x, -y, -z'
'x, -y, z-1/2'
'-x+1/2, -y+1/2, -z'
'x+1/2, -y+1/2, z-1/2'

_cell_length_a                   46.4390(4)
_cell_length_b                   10.43100(10)
_cell_length_c                   21.2250(2)
_cell_angle_alpha                90.00
_cell_angle_beta                 115.4740(10)
_cell_angle_gamma                90.00
_cell_volume                     9281.93(15)
_cell_formula_units_Z            8
_cell_measurement_temperature    150(2)
_cell_measurement_reflns_used    77888
_cell_measurement_theta_min      3.62
_cell_measurement_theta_max      27.49

_exptl_crystal_description       Block
_exptl_crystal_colour            Yellow
_exptl_crystal_size_max          0.40
_exptl_crystal_size_mid          0.25
_exptl_crystal_size_min          0.10
_exptl_crystal_density_meas      ?
_exptl_crystal_density_diffrn    1.227
_exptl_crystal_density_method    'not measured'
_exptl_crystal_F_000             3656
_exptl_absorpt_coefficient_mu    0.954
_exptl_absorpt_correction_type   Multi-scan
_exptl_absorpt_correction_T_min  0.7014
_exptl_absorpt_correction_T_max  0.9106
_exptl_absorpt_process_details   'SORTAV (Blessing, 1995)'

_exptl_special_details           
; 
 ? 
;

_diffrn_ambient_temperature      150(2)
_diffrn_radiation_wavelength     0.71073
_diffrn_radiation_type           MoK\a
_diffrn_radiation_source         'fine-focus sealed tube'
_diffrn_radiation_monochromator  graphite
_diffrn_measurement_device_type  'Bruker Kappa CCD Diffractometer'
_diffrn_measurement_method       'omega and phi scans'
_diffrn_detector_area_resol_mean ?
_diffrn_standards_number         0
_diffrn_standards_interval_count 0
_diffrn_standards_interval_time  0
_diffrn_standards_decay_%        0
_diffrn_reflns_number            77888
_diffrn_reflns_av_R_equivalents  0.0492
_diffrn_reflns_av_sigmaI/netI    0.0320
_diffrn_reflns_limit_h_min       -60
_diffrn_reflns_limit_h_max       60
_diffrn_reflns_limit_k_min       -13
_diffrn_reflns_limit_k_max       13
_diffrn_reflns_limit_l_min       -27
_diffrn_reflns_limit_l_max       27
_diffrn_reflns_theta_min         3.62
_diffrn_reflns_theta_max         27.49
_reflns_number_total             10630
_reflns_number_gt                8674
_reflns_threshold_expression     >2sigma(I)

_computing_data_collection       'Kappa CCD'
_computing_cell_refinement       'HKL Scalepack (Otwinowski & Minor 1997)'
_computing_data_reduction        'Denzo and Scalepak (Otwinowski & Minor, 1997)'
_computing_structure_solution    'SHELXS-86 (Sheldrick, 1986)'
_computing_structure_refinement  'SHELXL-97 (Sheldrick, 1997)'
_computing_molecular_graphics    'ORTEP 3 for Windows (Farrugia, 1997)'
_computing_publication_material  'SHELXL-97 (Sheldrick, 1997)'

_refine_special_details          
; 
 Refinement of F^2^ against ALL reflections.  The weighted R-factor wR and 
 goodness of fit S are based on F^2^, conventional R-factors R are based 
 on F, with F set to zero for negative F^2^. The threshold expression of 
 F^2^ > 2sigma(F^2^) is used only for calculating R-factors(gt) etc. and is 
 not relevant to the choice of reflections for refinement.  R-factors based 
 on F^2^ are statistically about twice as large as those based on F, and R- 
 factors based on ALL data will be even larger. 
;

_refine_ls_structure_factor_coef Fsqd
_refine_ls_matrix_type           full
_refine_ls_weighting_scheme      calc
_refine_ls_weighting_details     
'calc w=1/[\s^2^(Fo^2^)+(0.0325P)^2^+14.5278P] where P=(Fo^2^+2Fc^2^)/3'
_atom_sites_solution_primary     direct
_atom_sites_solution_secondary   difmap
_atom_sites_solution_hydrogens   geom
_refine_ls_hydrogen_treatment    Constr
_refine_ls_extinction_method     SHELXL
_refine_ls_extinction_coef       0.00046(6)
_refine_ls_extinction_expression Fc^*^=kFc[1+0.001xFc^2^\l^3^/sin(2\q)]^-1/4^
_refine_ls_number_reflns         10630
_refine_ls_number_parameters     539
_refine_ls_number_restraints     0
_refine_ls_R_factor_all          0.0509
_refine_ls_R_factor_gt           0.0360
_refine_ls_wR_factor_ref         0.0899
_refine_ls_wR_factor_gt          0.0830
_refine_ls_goodness_of_fit_ref   1.071
_refine_ls_restrained_S_all      1.071
_refine_ls_shift/su_max          0.000
_refine_ls_shift/su_mean         0.000

loop_
_atom_site_label
_atom_site_type_symbol
_atom_site_fract_x
_atom_site_fract_y
_atom_site_fract_z
_atom_site_U_iso_or_equiv
_atom_site_adp_type
_atom_site_occupancy
_atom_site_symmetry_multiplicity
_atom_site_calc_flag
_atom_site_refinement_flags
_atom_site_disorder_assembly
_atom_site_disorder_group
Cu1 Cu 0.222582(5) 0.28389(2) -0.036251(11) 0.02237(7) Uani 1 1 d . . .
Cu2 Cu -0.008812(5) 0.40452(2) 0.296547(12) 0.02098(7) Uani 0.95 1 d P . 1
Cu2A Cu 0.02784(12) 0.4072(5) 0.2928(3) 0.0311(11) Uiso 0.05 1 d P . 2
N1 N 0.22041(4) 0.32790(16) 0.04755(8) 0.0225(3) Uani 1 1 d . . .
N2 N 0.24359(4) 0.31549(15) 0.11013(8) 0.0224(3) Uani 1 1 d . . .
N3 N 0.26982(4) 0.26681(16) 0.11288(8) 0.0232(3) Uani 1 1 d . . .
N4 N 0.03457(4) 0.41499(16) 0.35827(8) 0.0209(3) Uani 0.95 1 d P A 1
N5 N 0.05835(4) 0.40244(16) 0.34159(8) 0.0208(3) Uani 0.95 1 d P A 1
N6 N 0.05057(4) 0.39188(16) 0.27487(8) 0.0208(3) Uani 0.95 1 d P . 1
N6A N -0.0374(8) 0.401(3) 0.2815(17) 0.026(7) Uiso 0.05 1 d P . 2
N5A N -0.0178(9) 0.405(4) 0.349(2) 0.038(9) Uiso 0.05 1 d P A 2
N4A N 0.0136(9) 0.407(3) 0.3594(18) 0.028(7) Uiso 0.05 1 d P A 2
C1 C 0.19200(4) 0.38477(19) 0.04778(9) 0.0234(4) Uani 1 1 d . . .
C2 C 0.17027(5) 0.3073(2) 0.06049(10) 0.0255(4) Uani 1 1 d . . .
C3 C 0.14195(5) 0.3643(2) 0.05422(11) 0.0314(5) Uani 1 1 d . . .
H3 H 0.1270 0.3146 0.0634 0.038 Uiso 1 1 calc R . .
C4 C 0.13510(5) 0.4912(2) 0.03489(11) 0.0340(5) Uani 1 1 d . . .
H4 H 0.1154 0.5273 0.0299 0.041 Uiso 1 1 calc R . .
C5 C 0.15682(5) 0.5653(2) 0.02291(11) 0.0322(5) Uani 1 1 d . . .
H5 H 0.1520 0.6527 0.0100 0.039 Uiso 1 1 calc R . .
C6 C 0.18579(5) 0.5140(2) 0.02949(10) 0.0271(4) Uani 1 1 d . . .
C7 C 0.17649(5) 0.1655(2) 0.07682(11) 0.0327(5) Uani 1 1 d . . .
H7 H 0.2001 0.1532 0.1025 0.039 Uiso 1 1 calc R . .
C8 C 0.16492(8) 0.0890(2) 0.00862(14) 0.0524(7) Uani 1 1 d . . .
H8A H 0.1417 0.0965 -0.0168 0.079 Uiso 1 1 calc R . .
H8B H 0.1708 -0.0014 0.0192 0.079 Uiso 1 1 calc R . .
H8C H 0.1749 0.1230 -0.0202 0.079 Uiso 1 1 calc R . .
C9 C 0.16130(6) 0.1118(3) 0.12218(14) 0.0480(6) Uani 1 1 d . . .
H9A H 0.1681 0.1629 0.1649 0.072 Uiso 1 1 calc R . .
H9B H 0.1680 0.0226 0.1344 0.072 Uiso 1 1 calc R . .
H9C H 0.1380 0.1153 0.0964 0.072 Uiso 1 1 calc R . .
C10 C 0.20902(5) 0.5960(2) 0.01399(12) 0.0356(5) Uani 1 1 d . . .
H10 H 0.2306 0.5554 0.0377 0.043 Uiso 1 1 calc R . .
C11 C 0.21174(7) 0.7327(3) 0.04183(18) 0.0585(8) Uani 1 1 d . . .
H11A H 0.1914 0.7775 0.0165 0.088 Uiso 1 1 calc R . .
H11B H 0.2287 0.7781 0.0352 0.088 Uiso 1 1 calc R . .
H11C H 0.2168 0.7301 0.0917 0.088 Uiso 1 1 calc R . .
C12 C 0.19970(7) 0.5968(3) -0.06488(14) 0.0514(7) Uani 1 1 d . . .
H12A H 0.1988 0.5085 -0.0814 0.077 Uiso 1 1 calc R . .
H12B H 0.2156 0.6451 -0.0739 0.077 Uiso 1 1 calc R . .
H12C H 0.1787 0.6372 -0.0895 0.077 Uiso 1 1 calc R . .
C13 C 0.29486(5) 0.2597(2) 0.18371(10) 0.0264(4) Uani 1 1 d . . .
C14 C 0.29538(5) 0.1574(2) 0.22683(10) 0.0309(5) Uani 1 1 d . . .
C15 C 0.32019(6) 0.1541(3) 0.29415(11) 0.0403(6) Uani 1 1 d . . .
H15 H 0.3208 0.0876 0.3252 0.048 Uiso 1 1 calc R . .
C16 C 0.34375(6) 0.2457(3) 0.31601(12) 0.0450(6) Uani 1 1 d . . .
H16 H 0.3604 0.2415 0.3619 0.054 Uiso 1 1 calc R . .
C17 C 0.34345(5) 0.3436(3) 0.27199(12) 0.0409(6) Uani 1 1 d . . .
H17 H 0.3601 0.4054 0.2877 0.049 Uiso 1 1 calc R . .
C18 C 0.31885(5) 0.3529(2) 0.20430(10) 0.0304(5) Uani 1 1 d . . .
C19 C 0.26992(5) 0.0539(2) 0.20438(11) 0.0349(5) Uani 1 1 d . . .
H19 H 0.2571 0.0610 0.1527 0.042 Uiso 1 1 calc R . .
C20 C 0.24732(6) 0.0737(3) 0.23876(14) 0.0530(7) Uani 1 1 d . . .
H20A H 0.2593 0.0662 0.2895 0.080 Uiso 1 1 calc R . .
H20B H 0.2305 0.0085 0.2218 0.080 Uiso 1 1 calc R . .
H20C H 0.2377 0.1591 0.2270 0.080 Uiso 1 1 calc R . .
C21 C 0.28408(6) -0.0816(2) 0.22032(14) 0.0477(6) Uani 1 1 d . . .
H21A H 0.2997 -0.0919 0.2011 0.071 Uiso 1 1 calc R . .
H21B H 0.2670 -0.1449 0.1991 0.071 Uiso 1 1 calc R . .
H21C H 0.2946 -0.0946 0.2710 0.071 Uiso 1 1 calc R . .
C22 C 0.31775(5) 0.4616(2) 0.15569(12) 0.0354(5) Uani 1 1 d . . .
H22 H 0.3071 0.4276 0.1070 0.042 Uiso 1 1 calc R . .
C23 C 0.29728(6) 0.5724(2) 0.16077(14) 0.0448(6) Uani 1 1 d . . .
H23A H 0.2764 0.5396 0.1542 0.067 Uiso 1 1 calc R . .
H23B H 0.2944 0.6359 0.1245 0.067 Uiso 1 1 calc R . .
H23C H 0.3079 0.6127 0.2068 0.067 Uiso 1 1 calc R . .
C24 C 0.35059(6) 0.5122(3) 0.16653(15) 0.0497(6) Uani 1 1 d . . .
H24A H 0.3612 0.5521 0.2127 0.075 Uiso 1 1 calc R . .
H24B H 0.3480 0.5758 0.1305 0.075 Uiso 1 1 calc R . .
H24C H 0.3636 0.4409 0.1633 0.075 Uiso 1 1 calc R . .
C25 C 0.04462(5) 0.4366(2) 0.43210(10) 0.0265(4) Uani 1 1 d . . .
H25 H 0.0673 0.4453 0.4394 0.032 Uiso 1 1 calc R A 1
C26 C 0.05280(5) 0.3321(2) 0.47780(10) 0.0302(4) Uani 1 1 d . A .
C27 C 0.06140(6) 0.3592(2) 0.54840(11) 0.0404(6) Uani 1 1 d . . .
H27 H 0.0674 0.2906 0.5810 0.049 Uiso 1 1 calc R A .
C28 C 0.06137(6) 0.4817(3) 0.57155(12) 0.0433(6) Uani 1 1 d . A .
H28 H 0.0671 0.4970 0.6196 0.052 Uiso 1 1 calc R . .
C29 C 0.05311(6) 0.5824(2) 0.52572(12) 0.0405(5) Uani 1 1 d . . .
H29 H 0.0530 0.6668 0.5424 0.049 Uiso 1 1 calc R A .
C30 C 0.04485(5) 0.5632(2) 0.45483(11) 0.0329(5) Uani 1 1 d . A .
C31 C 0.05315(6) 0.1973(2) 0.45321(12) 0.0383(5) Uani 1 1 d . . .
H31 H 0.0404 0.1971 0.4014 0.046 Uiso 1 1 calc R A .
C32 C 0.03714(10) 0.1030(3) 0.48328(19) 0.0754(10) Uani 1 1 d . A .
H32A H 0.0502 0.0941 0.5336 0.113 Uiso 1 1 calc R . .
H32B H 0.0350 0.0193 0.4607 0.113 Uiso 1 1 calc R . .
H32C H 0.0159 0.1351 0.4748 0.113 Uiso 1 1 calc R . .
C33 C 0.08680(7) 0.1561(3) 0.46793(19) 0.0726(10) Uani 1 1 d . A .
H33A H 0.0955 0.2148 0.4445 0.109 Uiso 1 1 calc R . .
H33B H 0.0864 0.0689 0.4504 0.109 Uiso 1 1 calc R . .
H33C H 0.1002 0.1581 0.5184 0.109 Uiso 1 1 calc R . .
C34 C 0.03618(6) 0.6772(2) 0.40461(12) 0.0399(5) Uani 1 1 d . . .
H34 H 0.0319 0.6435 0.3573 0.048 Uiso 1 1 calc R A .
C35 C 0.00571(7) 0.7407(3) 0.3994(2) 0.0698(9) Uani 1 1 d . A .
H35A H 0.0091 0.7730 0.4454 0.105 Uiso 1 1 calc R . .
H35B H -0.0117 0.6777 0.3833 0.105 Uiso 1 1 calc R . .
H35C H 0.0001 0.8120 0.3662 0.105 Uiso 1 1 calc R . .
C36 C 0.06332(7) 0.7723(3) 0.42545(15) 0.0519(7) Uani 1 1 d . A .
H36A H 0.0578 0.8395 0.3899 0.078 Uiso 1 1 calc R . .
H36B H 0.0827 0.7280 0.4296 0.078 Uiso 1 1 calc R . .
H36C H 0.0671 0.8110 0.4704 0.078 Uiso 1 1 calc R . .
C37 C 0.07751(4) 0.37875(19) 0.25885(10) 0.0250(4) Uani 1 1 d . . .
C38 C 0.07865(5) 0.2693(2) 0.22082(11) 0.0275(4) Uani 1 1 d . . .
C39 C 0.10370(5) 0.2606(2) 0.20100(11) 0.0314(5) Uani 1 1 d . . .
H39 H 0.1050 0.1883 0.1751 0.038 Uiso 1 1 calc R . .
C40 C 0.12650(5) 0.3551(2) 0.21845(11) 0.0334(5) Uani 1 1 d . . .
H40 H 0.1434 0.3471 0.2049 0.040 Uiso 1 1 calc R . .
C41 C 0.12489(5) 0.4610(2) 0.25540(11) 0.0323(5) Uani 1 1 d . . .
H41 H 0.1409 0.5250 0.2674 0.039 Uiso 1 1 calc R . .
C42 C 0.10023(5) 0.4766(2) 0.27556(10) 0.0270(4) Uani 1 1 d . . .
C43 C 0.05378(5) 0.1630(2) 0.20429(12) 0.0366(5) Uani 1 1 d . . .
H43 H 0.0323 0.2047 0.1857 0.044 Uiso 1 1 calc R . .
C44 C 0.05361(7) 0.0692(3) 0.14886(16) 0.0558(7) Uani 1 1 d . . .
H44A H 0.0739 0.0224 0.1668 0.084 Uiso 1 1 calc R . .
H44B H 0.0509 0.1167 0.1068 0.084 Uiso 1 1 calc R . .
H44C H 0.0360 0.0084 0.1374 0.084 Uiso 1 1 calc R . .
C45 C 0.05821(7) 0.0892(2) 0.26974(15) 0.0490(6) Uani 1 1 d . . .
H45A H 0.0408 0.0274 0.2583 0.073 Uiso 1 1 calc R . .
H45B H 0.0581 0.1493 0.3051 0.073 Uiso 1 1 calc R . .
H45C H 0.0786 0.0434 0.2879 0.073 Uiso 1 1 calc R . .
C46 C 0.09763(5) 0.6005(2) 0.31054(12) 0.0355(5) Uani 1 1 d . . .
H46 H 0.0849 0.5823 0.3374 0.043 Uiso 1 1 calc R . .
C47 C 0.12971(6) 0.6546(2) 0.36107(13) 0.0437(6) Uani 1 1 d . . .
H47A H 0.1419 0.6800 0.3353 0.066 Uiso 1 1 calc R . .
H47B H 0.1416 0.5891 0.3956 0.066 Uiso 1 1 calc R . .
H47C H 0.1263 0.7296 0.3849 0.066 Uiso 1 1 calc R . .
C48 C 0.07950(8) 0.6990(3) 0.25484(17) 0.0777(12) Uani 1 1 d . . .
H48A H 0.0770 0.7779 0.2771 0.117 Uiso 1 1 calc R . .
H48B H 0.0584 0.6650 0.2242 0.117 Uiso 1 1 calc R . .
H48C H 0.0913 0.7175 0.2272 0.117 Uiso 1 1 calc R . .

loop_
_atom_site_aniso_label
_atom_site_aniso_U_11
_atom_site_aniso_U_22
_atom_site_aniso_U_33
_atom_site_aniso_U_23
_atom_site_aniso_U_13
_atom_site_aniso_U_12
Cu1 0.01973(12) 0.02915(14) 0.01799(12) 0.00042(9) 0.00788(9) 0.00393(9)
Cu2 0.01779(12) 0.02528(13) 0.01892(12) -0.00054(9) 0.00699(9) -0.00082(9)
N1 0.0208(8) 0.0272(8) 0.0192(7) 0.0013(6) 0.0082(6) 0.0044(6)
N2 0.0203(8) 0.0263(8) 0.0205(8) 0.0008(6) 0.0086(6) 0.0031(6)
N3 0.0198(8) 0.0297(9) 0.0187(7) -0.0002(6) 0.0070(6) 0.0035(7)
N4 0.0199(8) 0.0235(9) 0.0190(8) -0.0013(7) 0.0081(6) -0.0006(6)
N5 0.0193(8) 0.0210(8) 0.0212(8) -0.0009(7) 0.0080(6) -0.0005(6)
N6 0.0187(8) 0.0237(9) 0.0200(8) -0.0015(7) 0.0083(6) -0.0005(6)
C1 0.0206(9) 0.0312(11) 0.0173(8) -0.0025(8) 0.0070(7) 0.0033(8)
C2 0.0239(9) 0.0340(11) 0.0182(9) -0.0002(8) 0.0088(7) 0.0036(8)
C3 0.0243(10) 0.0448(13) 0.0273(10) -0.0016(9) 0.0132(8) -0.0004(9)
C4 0.0229(10) 0.0445(13) 0.0325(11) -0.0066(10) 0.0097(9) 0.0085(9)
C5 0.0291(11) 0.0299(11) 0.0322(11) -0.0043(9) 0.0081(9) 0.0069(9)
C6 0.0250(10) 0.0288(10) 0.0244(10) -0.0024(8) 0.0079(8) 0.0027(8)
C7 0.0310(11) 0.0353(12) 0.0353(11) 0.0101(9) 0.0177(9) 0.0058(9)
C8 0.083(2) 0.0310(13) 0.0533(16) 0.0001(11) 0.0386(15) 0.0026(13)
C9 0.0502(15) 0.0513(16) 0.0523(15) 0.0159(12) 0.0312(13) 0.0032(12)
C10 0.0301(11) 0.0285(11) 0.0441(13) 0.0035(10) 0.0120(10) 0.0006(9)
C11 0.0529(16) 0.0355(14) 0.083(2) -0.0111(14) 0.0251(16) -0.0092(12)
C12 0.0581(17) 0.0457(15) 0.0542(16) 0.0097(13) 0.0279(14) -0.0090(13)
C13 0.0220(9) 0.0366(11) 0.0185(9) -0.0027(8) 0.0068(8) 0.0081(8)
C14 0.0289(10) 0.0405(12) 0.0220(10) 0.0002(9) 0.0097(8) 0.0101(9)
C15 0.0417(13) 0.0505(15) 0.0227(10) 0.0026(10) 0.0082(9) 0.0168(11)
C16 0.0368(13) 0.0613(16) 0.0233(11) -0.0071(11) 0.0000(10) 0.0145(12)
C17 0.0286(11) 0.0530(15) 0.0330(12) -0.0174(11) 0.0055(9) 0.0028(10)
C18 0.0252(10) 0.0386(12) 0.0261(10) -0.0094(9) 0.0098(8) 0.0052(9)
C19 0.0342(11) 0.0432(13) 0.0256(10) 0.0090(9) 0.0113(9) 0.0079(10)
C20 0.0443(14) 0.076(2) 0.0439(15) 0.0054(13) 0.0243(12) 0.0068(14)
C21 0.0459(14) 0.0442(15) 0.0483(15) 0.0128(12) 0.0160(12) 0.0063(11)
C22 0.0329(11) 0.0410(13) 0.0326(11) -0.0125(10) 0.0145(9) -0.0064(10)
C23 0.0474(14) 0.0421(14) 0.0464(14) 0.0029(11) 0.0217(12) 0.0071(11)
C24 0.0422(14) 0.0471(15) 0.0629(17) -0.0187(13) 0.0256(13) -0.0131(12)
C25 0.0198(9) 0.0359(11) 0.0215(9) -0.0035(8) 0.0069(8) -0.0029(8)
C26 0.0269(10) 0.0366(12) 0.0252(10) 0.0009(9) 0.0096(8) -0.0070(9)
C27 0.0427(13) 0.0488(14) 0.0257(11) 0.0061(10) 0.0110(10) -0.0123(11)
C28 0.0448(14) 0.0597(16) 0.0270(11) -0.0121(11) 0.0168(10) -0.0177(12)
C29 0.0400(13) 0.0471(14) 0.0335(12) -0.0144(11) 0.0149(10) -0.0039(11)
C30 0.0301(11) 0.0359(12) 0.0290(11) -0.0073(9) 0.0093(9) 0.0017(9)
C31 0.0456(13) 0.0321(12) 0.0331(11) 0.0036(9) 0.0129(10) -0.0039(10)
C32 0.125(3) 0.0405(16) 0.078(2) -0.0045(15) 0.060(2) -0.0257(18)
C33 0.0570(18) 0.0550(19) 0.089(2) -0.0226(17) 0.0151(17) 0.0066(15)
C34 0.0446(13) 0.0332(12) 0.0344(12) -0.0076(10) 0.0099(10) 0.0033(10)
C35 0.0448(16) 0.0582(19) 0.091(2) 0.0088(17) 0.0144(16) 0.0095(14)
C36 0.0560(16) 0.0401(14) 0.0578(17) 0.0039(12) 0.0227(14) 0.0030(12)
C37 0.0203(9) 0.0285(10) 0.0254(9) 0.0010(8) 0.0091(8) 0.0020(8)
C38 0.0249(10) 0.0274(10) 0.0289(10) 0.0011(8) 0.0103(8) 0.0025(8)
C39 0.0316(11) 0.0339(11) 0.0286(10) -0.0002(9) 0.0129(9) 0.0085(9)
C40 0.0261(10) 0.0468(13) 0.0311(11) 0.0026(10) 0.0160(9) 0.0053(9)
C41 0.0236(10) 0.0408(12) 0.0323(11) 0.0008(9) 0.0118(9) -0.0048(9)
C42 0.0247(10) 0.0300(11) 0.0262(10) -0.0013(8) 0.0109(8) -0.0019(8)
C43 0.0327(11) 0.0302(12) 0.0468(13) -0.0089(10) 0.0170(10) -0.0023(9)
C44 0.0648(18) 0.0421(15) 0.0635(18) -0.0184(13) 0.0305(15) -0.0122(13)
C45 0.0617(17) 0.0345(13) 0.0628(17) -0.0008(12) 0.0383(14) -0.0042(12)
C46 0.0362(12) 0.0328(12) 0.0424(12) -0.0086(10) 0.0217(10) -0.0073(9)
C47 0.0470(14) 0.0395(13) 0.0370(13) -0.0053(11) 0.0110(11) -0.0084(11)
C48 0.075(2) 0.0488(17) 0.0638(19) -0.0183(15) -0.0131(16) 0.0293(16)

_geom_special_details            
; 
 All esds (except the esd in the dihedral angle between two l.s. planes) 
 are estimated using the full covariance matrix.  The cell esds are taken 
 into account individually in the estimation of esds in distances, angles 
 and torsion angles; correlations between esds in cell parameters are only 
 used when they are defined by crystal symmetry.  An approximate (isotropic) 
 treatment of cell esds is used for estimating esds involving l.s. planes. 
;

loop_
_geom_bond_atom_site_label_1
_geom_bond_atom_site_label_2
_geom_bond_distance
_geom_bond_site_symmetry_2
_geom_bond_publ_flag
Cu1 N1 1.8811(15) . ?
Cu1 N3 1.8824(16) 7 ?
Cu1 Cu1 2.4458(4) 7 ?
Cu2 N4 1.8753(16) . ?
Cu2 N6 1.8834(16) 2 ?
Cu2 Cu2 2.4423(5) 2 ?
Cu2A N4A 1.80(4) . ?
Cu2A N6A 1.81(3) 2 ?
Cu2A Cu2A 2.438(10) 2 ?
N1 N2 1.308(2) . ?
N1 C1 1.449(2) . ?
N2 N3 1.298(2) . ?
N3 C13 1.454(2) . ?
N3 Cu1 1.8824(16) 7 ?
N4 N5 1.303(2) . ?
N4 C25 1.447(2) . ?
N5 N6 1.307(2) . ?
N6 C37 1.437(2) . ?
N6 Cu2 1.8834(16) 2 ?
N6A N5A 1.33(5) . ?
N6A C37 1.70(3) 2 ?
N6A Cu2A 1.81(3) 2 ?
N5A N4A 1.38(5) . ?
N4A C25 1.62(3) . ?
C1 C6 1.398(3) . ?
C1 C2 1.406(3) . ?
C2 C3 1.397(3) . ?
C2 C7 1.518(3) . ?
C3 C4 1.382(3) . ?
C3 H3 0.9500 . ?
C4 C5 1.379(3) . ?
C4 H4 0.9500 . ?
C5 C6 1.398(3) . ?
C5 H5 0.9500 . ?
C6 C10 1.519(3) . ?
C7 C9 1.524(3) . ?
C7 C8 1.534(3) . ?
C7 H7 1.0000 . ?
C8 H8A 0.9800 . ?
C8 H8B 0.9800 . ?
C8 H8C 0.9800 . ?
C9 H9A 0.9800 . ?
C9 H9B 0.9800 . ?
C9 H9C 0.9800 . ?
C10 C11 1.528(3) . ?
C10 C12 1.538(3) . ?
C10 H10 1.0000 . ?
C11 H11A 0.9800 . ?
C11 H11B 0.9800 . ?
C11 H11C 0.9800 . ?
C12 H12A 0.9800 . ?
C12 H12B 0.9800 . ?
C12 H12C 0.9800 . ?
C13 C18 1.399(3) . ?
C13 C14 1.399(3) . ?
C14 C15 1.398(3) . ?
C14 C19 1.519(3) . ?
C15 C16 1.374(4) . ?
C15 H15 0.9500 . ?
C16 C17 1.380(4) . ?
C16 H16 0.9500 . ?
C17 C18 1.402(3) . ?
C17 H17 0.9500 . ?
C18 C22 1.520(3) . ?
C19 C20 1.528(3) . ?
C19 C21 1.534(3) . ?
C19 H19 1.0000 . ?
C20 H20A 0.9800 . ?
C20 H20B 0.9800 . ?
C20 H20C 0.9800 . ?
C21 H21A 0.9800 . ?
C21 H21B 0.9800 . ?
C21 H21C 0.9800 . ?
C22 C23 1.529(3) . ?
C22 C24 1.535(3) . ?
C22 H22 1.0000 . ?
C23 H23A 0.9800 . ?
C23 H23B 0.9800 . ?
C23 H23C 0.9800 . ?
C24 H24A 0.9800 . ?
C24 H24B 0.9800 . ?
C24 H24C 0.9800 . ?
C25 C26 1.398(3) . ?
C25 C30 1.405(3) . ?
C25 H25 1.0000 . ?
C26 C27 1.404(3) . ?
C26 C31 1.503(3) . ?
C27 C28 1.370(4) . ?
C27 H27 0.9500 . ?
C28 C29 1.369(4) . ?
C28 H28 0.9500 . ?
C29 C30 1.398(3) . ?
C29 H29 0.9500 . ?
C30 C34 1.531(3) . ?
C31 C33 1.518(4) . ?
C31 C32 1.529(4) . ?
C31 H31 1.0000 . ?
C32 H32A 0.9800 . ?
C32 H32B 0.9800 . ?
C32 H32C 0.9800 . ?
C33 H33A 0.9800 . ?
C33 H33B 0.9800 . ?
C33 H33C 0.9800 . ?
C34 C36 1.513(4) . ?
C34 C35 1.523(4) . ?
C34 H34 1.0000 . ?
C35 H35A 0.9800 . ?
C35 H35B 0.9800 . ?
C35 H35C 0.9800 . ?
C36 H36A 0.9800 . ?
C36 H36B 0.9800 . ?
C36 H36C 0.9800 . ?
C37 C42 1.399(3) . ?
C37 C38 1.412(3) . ?
C37 N6A 1.70(3) 2 ?
C38 C39 1.400(3) . ?
C38 C43 1.529(3) . ?
C39 C40 1.376(3) . ?
C39 H39 0.9500 . ?
C40 C41 1.376(3) . ?
C40 H40 0.9500 . ?
C41 C42 1.394(3) . ?
C41 H41 0.9500 . ?
C42 C46 1.522(3) . ?
C43 C45 1.523(4) . ?
C43 C44 1.527(3) . ?
C43 H43 1.0000 . ?
C44 H44A 0.9800 . ?
C44 H44B 0.9800 . ?
C44 H44C 0.9800 . ?
C45 H45A 0.9800 . ?
C45 H45B 0.9800 . ?
C45 H45C 0.9800 . ?
C46 C48 1.518(4) . ?
C46 C47 1.521(3) . ?
C46 H46 1.0000 . ?
C47 H47A 0.9800 . ?
C47 H47B 0.9800 . ?
C47 H47C 0.9800 . ?
C48 H48A 0.9800 . ?
C48 H48B 0.9800 . ?
C48 H48C 0.9800 . ?

loop_
_geom_angle_atom_site_label_1
_geom_angle_atom_site_label_2
_geom_angle_atom_site_label_3
_geom_angle
_geom_angle_site_symmetry_1
_geom_angle_site_symmetry_3
_geom_angle_publ_flag
N1 Cu1 N3 172.63(7) . 7 ?
N1 Cu1 Cu1 86.58(5) . 7 ?
N3 Cu1 Cu1 86.04(5) 7 7 ?
N4 Cu2 N6 172.42(7) . 2 ?
N4 Cu2 Cu2 86.11(5) . 2 ?
N6 Cu2 Cu2 86.34(5) 2 2 ?
N4A Cu2A N6A 173.1(15) . 2 ?
N4A Cu2A Cu2A 87.4(12) . 2 ?
N6A Cu2A Cu2A 86.0(11) 2 2 ?
N2 N1 C1 112.96(15) . . ?
N2 N1 Cu1 125.51(12) . . ?
C1 N1 Cu1 121.50(12) . . ?
N3 N2 N1 115.53(15) . . ?
N2 N3 C13 112.60(15) . . ?
N2 N3 Cu1 126.32(12) . 7 ?
C13 N3 Cu1 121.01(12) . 7 ?
N5 N4 C25 113.17(15) . . ?
N5 N4 Cu2 125.84(13) . . ?
C25 N4 Cu2 120.98(13) . . ?
N4 N5 N6 115.54(15) . . ?
N5 N6 C37 113.66(15) . . ?
N5 N6 Cu2 125.13(13) . 2 ?
C37 N6 Cu2 121.06(12) . 2 ?
N5A N6A C37 130(3) . 2 ?
N5A N6A Cu2A 129(3) . 2 ?
C37 N6A Cu2A 101.0(17) 2 2 ?
N6A N5A N4A 111(3) . . ?
N5A N4A C25 127(3) . . ?
N5A N4A Cu2A 127(3) . . ?
C25 N4A Cu2A 105.8(19) . . ?
C6 C1 C2 121.89(18) . . ?
C6 C1 N1 118.24(17) . . ?
C2 C1 N1 119.65(17) . . ?
C3 C2 C1 117.43(19) . . ?
C3 C2 C7 121.03(19) . . ?
C1 C2 C7 121.47(17) . . ?
C4 C3 C2 121.6(2) . . ?
C4 C3 H3 119.2 . . ?
C2 C3 H3 119.2 . . ?
C5 C4 C3 119.92(19) . . ?
C5 C4 H4 120.0 . . ?
C3 C4 H4 120.0 . . ?
C4 C5 C6 121.1(2) . . ?
C4 C5 H5 119.5 . . ?
C6 C5 H5 119.5 . . ?
C5 C6 C1 118.13(19) . . ?
C5 C6 C10 120.37(19) . . ?
C1 C6 C10 121.45(18) . . ?
C2 C7 C9 114.07(19) . . ?
C2 C7 C8 109.66(18) . . ?
C9 C7 C8 109.6(2) . . ?
C2 C7 H7 107.8 . . ?
C9 C7 H7 107.8 . . ?
C8 C7 H7 107.8 . . ?
C7 C8 H8A 109.5 . . ?
C7 C8 H8B 109.5 . . ?
H8A C8 H8B 109.5 . . ?
C7 C8 H8C 109.5 . . ?
H8A C8 H8C 109.5 . . ?
H8B C8 H8C 109.5 . . ?
C7 C9 H9A 109.5 . . ?
C7 C9 H9B 109.5 . . ?
H9A C9 H9B 109.5 . . ?
C7 C9 H9C 109.5 . . ?
H9A C9 H9C 109.5 . . ?
H9B C9 H9C 109.5 . . ?
C6 C10 C11 112.9(2) . . ?
C6 C10 C12 110.19(19) . . ?
C11 C10 C12 110.7(2) . . ?
C6 C10 H10 107.6 . . ?
C11 C10 H10 107.6 . . ?
C12 C10 H10 107.6 . . ?
C10 C11 H11A 109.5 . . ?
C10 C11 H11B 109.5 . . ?
H11A C11 H11B 109.5 . . ?
C10 C11 H11C 109.5 . . ?
H11A C11 H11C 109.5 . . ?
H11B C11 H11C 109.5 . . ?
C10 C12 H12A 109.5 . . ?
C10 C12 H12B 109.5 . . ?
H12A C12 H12B 109.5 . . ?
C10 C12 H12C 109.5 . . ?
H12A C12 H12C 109.5 . . ?
H12B C12 H12C 109.5 . . ?
C18 C13 C14 122.54(18) . . ?
C18 C13 N3 117.59(18) . . ?
C14 C13 N3 119.73(18) . . ?
C15 C14 C13 117.5(2) . . ?
C15 C14 C19 119.4(2) . . ?
C13 C14 C19 123.03(18) . . ?
C16 C15 C14 121.0(2) . . ?
C16 C15 H15 119.5 . . ?
C14 C15 H15 119.5 . . ?
C15 C16 C17 120.7(2) . . ?
C15 C16 H16 119.6 . . ?
C17 C16 H16 119.6 . . ?
C16 C17 C18 120.8(2) . . ?
C16 C17 H17 119.6 . . ?
C18 C17 H17 119.6 . . ?
C13 C18 C17 117.4(2) . . ?
C13 C18 C22 121.11(18) . . ?
C17 C18 C22 121.5(2) . . ?
C14 C19 C20 110.8(2) . . ?
C14 C19 C21 112.57(19) . . ?
C20 C19 C21 109.7(2) . . ?
C14 C19 H19 107.9 . . ?
C20 C19 H19 107.9 . . ?
C21 C19 H19 107.9 . . ?
C19 C20 H20A 109.5 . . ?
C19 C20 H20B 109.5 . . ?
H20A C20 H20B 109.5 . . ?
C19 C20 H20C 109.5 . . ?
H20A C20 H20C 109.5 . . ?
H20B C20 H20C 109.5 . . ?
C19 C21 H21A 109.5 . . ?
C19 C21 H21B 109.5 . . ?
H21A C21 H21B 109.5 . . ?
C19 C21 H21C 109.5 . . ?
H21A C21 H21C 109.5 . . ?
H21B C21 H21C 109.5 . . ?
C18 C22 C23 110.89(18) . . ?
C18 C22 C24 114.4(2) . . ?
C23 C22 C24 109.7(2) . . ?
C18 C22 H22 107.1 . . ?
C23 C22 H22 107.1 . . ?
C24 C22 H22 107.1 . . ?
C22 C23 H23A 109.5 . . ?
C22 C23 H23B 109.5 . . ?
H23A C23 H23B 109.5 . . ?
C22 C23 H23C 109.5 . . ?
H23A C23 H23C 109.5 . . ?
H23B C23 H23C 109.5 . . ?
C22 C24 H24A 109.5 . . ?
C22 C24 H24B 109.5 . . ?
H24A C24 H24B 109.5 . . ?
C22 C24 H24C 109.5 . . ?
H24A C24 H24C 109.5 . . ?
H24B C24 H24C 109.5 . . ?
C26 C25 C30 122.32(18) . . ?
C26 C25 N4 119.66(18) . . ?
C30 C25 N4 117.99(18) . . ?
C26 C25 N4A 112.2(12) . . ?
C30 C25 N4A 112.1(12) . . ?
N4 C25 N4A 36.9(13) . . ?
C26 C25 H25 90.5 . . ?
C30 C25 H25 90.5 . . ?
N4 C25 H25 90.5 . . ?
N4A C25 H25 127.5 . . ?
C25 C26 C27 116.9(2) . . ?
C25 C26 C31 121.91(18) . . ?
C27 C26 C31 121.2(2) . . ?
C28 C27 C26 121.8(2) . . ?
C28 C27 H27 119.1 . . ?
C26 C27 H27 119.1 . . ?
C29 C28 C27 120.3(2) . . ?
C29 C28 H28 119.9 . . ?
C27 C28 H28 119.9 . . ?
C28 C29 C30 121.2(2) . . ?
C28 C29 H29 119.4 . . ?
C30 C29 H29 119.4 . . ?
C29 C30 C25 117.6(2) . . ?
C29 C30 C34 120.4(2) . . ?
C25 C30 C34 122.05(19) . . ?
C26 C31 C33 110.9(2) . . ?
C26 C31 C32 112.2(2) . . ?
C33 C31 C32 112.0(3) . . ?
C26 C31 H31 107.1 . . ?
C33 C31 H31 107.1 . . ?
C32 C31 H31 107.1 . . ?
C31 C32 H32A 109.5 . . ?
C31 C32 H32B 109.5 . . ?
H32A C32 H32B 109.5 . . ?
C31 C32 H32C 109.5 . . ?
H32A C32 H32C 109.5 . . ?
H32B C32 H32C 109.5 . . ?
C31 C33 H33A 109.5 . . ?
C31 C33 H33B 109.5 . . ?
H33A C33 H33B 109.5 . . ?
C31 C33 H33C 109.5 . . ?
H33A C33 H33C 109.5 . . ?
H33B C33 H33C 109.5 . . ?
C36 C34 C35 111.6(2) . . ?
C36 C34 C30 111.7(2) . . ?
C35 C34 C30 110.2(2) . . ?
C36 C34 H34 107.7 . . ?
C35 C34 H34 107.7 . . ?
C30 C34 H34 107.7 . . ?
C34 C35 H35A 109.5 . . ?
C34 C35 H35B 109.5 . . ?
H35A C35 H35B 109.5 . . ?
C34 C35 H35C 109.5 . . ?
H35A C35 H35C 109.5 . . ?
H35B C35 H35C 109.5 . . ?
C34 C36 H36A 109.5 . . ?
C34 C36 H36B 109.5 . . ?
H36A C36 H36B 109.5 . . ?
C34 C36 H36C 109.5 . . ?
H36A C36 H36C 109.5 . . ?
H36B C36 H36C 109.5 . . ?
C42 C37 C38 121.63(18) . . ?
C42 C37 N6 120.59(18) . . ?
C38 C37 N6 117.57(17) . . ?
C42 C37 N6A 124.9(11) . 2 ?
C38 C37 N6A 97.2(11) . 2 ?
N6 C37 N6A 39.6(11) . 2 ?
C39 C38 C37 117.70(19) . . ?
C39 C38 C43 121.81(19) . . ?
C37 C38 C43 120.47(18) . . ?
C40 C39 C38 121.0(2) . . ?
C40 C39 H39 119.5 . . ?
C38 C39 H39 119.5 . . ?
C41 C40 C39 120.32(19) . . ?
C41 C40 H40 119.8 . . ?
C39 C40 H40 119.8 . . ?
C40 C41 C42 121.4(2) . . ?
C40 C41 H41 119.3 . . ?
C42 C41 H41 119.3 . . ?
C41 C42 C37 117.85(19) . . ?
C41 C42 C46 119.78(19) . . ?
C37 C42 C46 122.26(18) . . ?
C45 C43 C44 109.5(2) . . ?
C45 C43 C38 111.40(19) . . ?
C44 C43 C38 113.2(2) . . ?
C45 C43 H43 107.5 . . ?
C44 C43 H43 107.5 . . ?
C38 C43 H43 107.5 . . ?
C43 C44 H44A 109.5 . . ?
C43 C44 H44B 109.5 . . ?
H44A C44 H44B 109.5 . . ?
C43 C44 H44C 109.5 . . ?
H44A C44 H44C 109.5 . . ?
H44B C44 H44C 109.5 . . ?
C43 C45 H45A 109.5 . . ?
C43 C45 H45B 109.5 . . ?
H45A C45 H45B 109.5 . . ?
C43 C45 H45C 109.5 . . ?
H45A C45 H45C 109.5 . . ?
H45B C45 H45C 109.5 . . ?
C48 C46 C47 110.2(2) . . ?
C48 C46 C42 109.2(2) . . ?
C47 C46 C42 113.57(19) . . ?
C48 C46 H46 107.9 . . ?
C47 C46 H46 107.9 . . ?
C42 C46 H46 107.9 . . ?
C46 C47 H47A 109.5 . . ?
C46 C47 H47B 109.5 . . ?
H47A C47 H47B 109.5 . . ?
C46 C47 H47C 109.5 . . ?
H47A C47 H47C 109.5 . . ?
H47B C47 H47C 109.5 . . ?
C46 C48 H48A 109.5 . . ?
C46 C48 H48B 109.5 . . ?
H48A C48 H48B 109.5 . . ?
C46 C48 H48C 109.5 . . ?
H48A C48 H48C 109.5 . . ?
H48B C48 H48C 109.5 . . ?

loop_
_geom_torsion_atom_site_label_1
_geom_torsion_atom_site_label_2
_geom_torsion_atom_site_label_3
_geom_torsion_atom_site_label_4
_geom_torsion
_geom_torsion_site_symmetry_1
_geom_torsion_site_symmetry_2
_geom_torsion_site_symmetry_3
_geom_torsion_site_symmetry_4
_geom_torsion_publ_flag
N3 Cu1 N1 N2 0.5(7) 7 . . . ?
Cu1 Cu1 N1 N2 0.52(15) 7 . . . ?
N3 Cu1 N1 C1 178(8) 7 . . . ?
Cu1 Cu1 N1 C1 178.34(14) 7 . . . ?
C1 N1 N2 N3 -178.97(16) . . . . ?
Cu1 N1 N2 N3 -1.0(2) . . . . ?
N1 N2 N3 C13 178.08(16) . . . . ?
N1 N2 N3 Cu1 1.0(2) . . . 7 ?
N6 Cu2 N4 N5 -4.2(6) 2 . . . ?
Cu2 Cu2 N4 N5 -9.34(15) 2 . . . ?
N6 Cu2 N4 C25 176.9(5) 2 . . . ?
Cu2 Cu2 N4 C25 171.80(15) 2 . . . ?
C25 N4 N5 N6 -175.33(16) . . . . ?
Cu2 N4 N5 N6 5.7(2) . . . . ?
N4 N5 N6 C37 179.77(16) . . . . ?
N4 N5 N6 Cu2 4.3(2) . . . 2 ?
C37 N6A N5A N4A 172(3) 2 . . . ?
Cu2A N6A N5A N4A -3(5) 2 . . . ?
N6A N5A N4A C25 169(3) . . . . ?
N6A N5A N4A Cu2A 1(5) . . . . ?
N6A Cu2A N4A N5A -16(15) 2 . . . ?
Cu2A Cu2A N4A N5A 1(3) 2 . . . ?
N6A Cu2A N4A C25 174(12) 2 . . . ?
Cu2A Cu2A N4A C25 -168.7(16) 2 . . . ?
N2 N1 C1 C6 102.4(2) . . . . ?
Cu1 N1 C1 C6 -75.7(2) . . . . ?
N2 N1 C1 C2 -82.8(2) . . . . ?
Cu1 N1 C1 C2 99.10(18) . . . . ?
C6 C1 C2 C3 0.0(3) . . . . ?
N1 C1 C2 C3 -174.59(17) . . . . ?
C6 C1 C2 C7 176.94(18) . . . . ?
N1 C1 C2 C7 2.4(3) . . . . ?
C1 C2 C3 C4 1.3(3) . . . . ?
C7 C2 C3 C4 -175.70(19) . . . . ?
C2 C3 C4 C5 -1.5(3) . . . . ?
C3 C4 C5 C6 0.5(3) . . . . ?
C4 C5 C6 C1 0.8(3) . . . . ?
C4 C5 C6 C10 178.17(19) . . . . ?
C2 C1 C6 C5 -1.0(3) . . . . ?
N1 C1 C6 C5 173.67(17) . . . . ?
C2 C1 C6 C10 -178.35(18) . . . . ?
N1 C1 C6 C10 -3.7(3) . . . . ?
C3 C2 C7 C9 -31.6(3) . . . . ?
C1 C2 C7 C9 151.5(2) . . . . ?
C3 C2 C7 C8 91.8(2) . . . . ?
C1 C2 C7 C8 -85.1(2) . . . . ?
C5 C6 C10 C11 41.0(3) . . . . ?
C1 C6 C10 C11 -141.7(2) . . . . ?
C5 C6 C10 C12 -83.4(3) . . . . ?
C1 C6 C10 C12 94.0(2) . . . . ?
N2 N3 C13 C18 -102.0(2) . . . . ?
Cu1 N3 C13 C18 75.2(2) 7 . . . ?
N2 N3 C13 C14 82.0(2) . . . . ?
Cu1 N3 C13 C14 -100.72(19) 7 . . . ?
C18 C13 C14 C15 3.4(3) . . . . ?
N3 C13 C14 C15 179.18(18) . . . . ?
C18 C13 C14 C19 -178.41(19) . . . . ?
N3 C13 C14 C19 -2.7(3) . . . . ?
C13 C14 C15 C16 -2.3(3) . . . . ?
C19 C14 C15 C16 179.5(2) . . . . ?
C14 C15 C16 C17 0.2(4) . . . . ?
C15 C16 C17 C18 0.9(4) . . . . ?
C14 C13 C18 C17 -2.4(3) . . . . ?
N3 C13 C18 C17 -178.24(18) . . . . ?
C14 C13 C18 C22 179.11(19) . . . . ?
N3 C13 C18 C22 3.3(3) . . . . ?
C16 C17 C18 C13 0.2(3) . . . . ?
C16 C17 C18 C22 178.7(2) . . . . ?
C15 C14 C19 C20 73.9(3) . . . . ?
C13 C14 C19 C20 -104.3(2) . . . . ?
C15 C14 C19 C21 -49.4(3) . . . . ?
C13 C14 C19 C21 132.5(2) . . . . ?
C13 C18 C22 C23 84.8(2) . . . . ?
C17 C18 C22 C23 -93.7(2) . . . . ?
C13 C18 C22 C24 -150.5(2) . . . . ?
C17 C18 C22 C24 31.1(3) . . . . ?
N5 N4 C25 C26 -83.3(2) . . . . ?
Cu2 N4 C25 C26 95.7(2) . . . . ?
N5 N4 C25 C30 98.6(2) . . . . ?
Cu2 N4 C25 C30 -82.4(2) . . . . ?
N5 N4 C25 N4A -171(2) . . . . ?
Cu2 N4 C25 N4A 8(2) . . . . ?
N5A N4A C25 C26 76(3) . . . . ?
Cu2A N4A C25 C26 -113.9(14) . . . . ?
N5A N4A C25 C30 -66(4) . . . . ?
Cu2A N4A C25 C30 104.1(15) . . . . ?
N5A N4A C25 N4 -174(5) . . . . ?
Cu2A N4A C25 N4 -3.6(3) . . . . ?
C30 C25 C26 C27 0.0(3) . . . . ?
N4 C25 C26 C27 -178.11(18) . . . . ?
N4A C25 C26 C27 -137.7(14) . . . . ?
C30 C25 C26 C31 -178.7(2) . . . . ?
N4 C25 C26 C31 3.2(3) . . . . ?
N4A C25 C26 C31 43.7(14) . . . . ?
C25 C26 C27 C28 0.9(3) . . . . ?
C31 C26 C27 C28 179.6(2) . . . . ?
C26 C27 C28 C29 -0.6(4) . . . . ?
C27 C28 C29 C30 -0.6(4) . . . . ?
C28 C29 C30 C25 1.5(3) . . . . ?
C28 C29 C30 C34 -179.1(2) . . . . ?
C26 C25 C30 C29 -1.1(3) . . . . ?
N4 C25 C30 C29 176.98(19) . . . . ?
N4A C25 C30 C29 136.5(14) . . . . ?
C26 C25 C30 C34 179.4(2) . . . . ?
N4 C25 C30 C34 -2.5(3) . . . . ?
N4A C25 C30 C34 -42.9(14) . . . . ?
C25 C26 C31 C33 98.9(3) . . . . ?
C27 C26 C31 C33 -79.7(3) . . . . ?
C25 C26 C31 C32 -135.0(3) . . . . ?
C27 C26 C31 C32 46.4(3) . . . . ?
C29 C30 C34 C36 59.7(3) . . . . ?
C25 C30 C34 C36 -120.8(2) . . . . ?
C29 C30 C34 C35 -64.9(3) . . . . ?
C25 C30 C34 C35 114.6(3) . . . . ?
N5 N6 C37 C42 -62.2(2) . . . . ?
Cu2 N6 C37 C42 113.45(18) 2 . . . ?
N5 N6 C37 C38 122.89(19) . . . . ?
Cu2 N6 C37 C38 -61.4(2) 2 . . . ?
N5 N6 C37 N6A -171.4(18) . . . 2 ?
Cu2 N6 C37 N6A 4.3(17) 2 . . 2 ?
C42 C37 C38 C39 0.9(3) . . . . ?
N6 C37 C38 C39 175.71(17) . . . . ?
N6A C37 C38 C39 139.9(11) 2 . . . ?
C42 C37 C38 C43 179.06(19) . . . . ?
N6 C37 C38 C43 -6.1(3) . . . . ?
N6A C37 C38 C43 -42.0(11) 2 . . . ?
C37 C38 C39 C40 0.4(3) . . . . ?
C43 C38 C39 C40 -177.7(2) . . . . ?
C38 C39 C40 C41 -0.6(3) . . . . ?
C39 C40 C41 C42 -0.6(3) . . . . ?
C40 C41 C42 C37 1.9(3) . . . . ?
C40 C41 C42 C46 -174.5(2) . . . . ?
C38 C37 C42 C41 -2.0(3) . . . . ?
N6 C37 C42 C41 -176.70(18) . . . . ?
N6A C37 C42 C41 -129.5(14) 2 . . . ?
C38 C37 C42 C46 174.22(19) . . . . ?
N6 C37 C42 C46 -0.4(3) . . . . ?
N6A C37 C42 C46 46.8(14) 2 . . . ?
C39 C38 C43 C45 108.1(2) . . . . ?
C37 C38 C43 C45 -70.0(3) . . . . ?
C39 C38 C43 C44 -15.8(3) . . . . ?
C37 C38 C43 C44 166.1(2) . . . . ?
C41 C42 C46 C48 85.1(3) . . . . ?
C37 C42 C46 C48 -91.1(3) . . . . ?
C41 C42 C46 C47 -38.3(3) . . . . ?
C37 C42 C46 C47 145.5(2) . . . . ?

_diffrn_measured_fraction_theta_max 0.996
_diffrn_reflns_theta_full        27.49
_diffrn_measured_fraction_theta_full 0.996
_refine_diff_density_max         0.355
_refine_diff_density_min         -0.877
_refine_diff_density_rms         0.073

#===END
 
data_Ag3L3:Tol 

 
_audit_creation_method            SHELXL-97 
_chemical_name_systematic 
; 
 ? 
; 
_chemical_name_common             ? 
_chemical_melting_point           ? 
_chemical_formula_moiety          ? 
_chemical_formula_sum 
 'C79 H110 Ag3 N9' 
_chemical_formula_weight          1509.37 
 
loop_ 
 _atom_type_symbol 
 _atom_type_description 
 _atom_type_scat_dispersion_real 
 _atom_type_scat_dispersion_imag 
 _atom_type_scat_source 
 'C'  'C'   0.0033   0.0016 
 'International Tables Vol C Tables 4.2.6.8 and 6.1.1.4' 
 'H'  'H'   0.0000   0.0000 
 'International Tables Vol C Tables 4.2.6.8 and 6.1.1.4' 
 'Ag'  'Ag'  -0.8971   1.1015 
 'International Tables Vol C Tables 4.2.6.8 and 6.1.1.4' 
 'N'  'N'   0.0061   0.0033 
 'International Tables Vol C Tables 4.2.6.8 and 6.1.1.4' 
 
_symmetry_cell_setting            Monoclinic 
_symmetry_space_group_name_H-M    P21/c 
 
loop_ 
 _symmetry_equiv_pos_as_xyz 
 'x, y, z' 
 '-x, y+1/2, -z+1/2' 
 '-x, -y, -z' 
 'x, -y-1/2, z-1/2' 
 
_cell_length_a                    19.77800(10) 
_cell_length_b                    19.97300(10) 
_cell_length_c                    19.96700(10) 
_cell_angle_alpha                 90.00 
_cell_angle_beta                  99.5770(10) 
_cell_angle_gamma                 90.00 
_cell_volume                      7777.55(7) 
_cell_formula_units_Z             4 
_cell_measurement_temperature     150(2) 
_cell_measurement_reflns_used     144388 
_cell_measurement_theta_min       8.17 
_cell_measurement_theta_max       30.50 
 
_exptl_crystal_description        Block 
_exptl_crystal_colour             yellow 
_exptl_crystal_size_max           0.22 
_exptl_crystal_size_mid           0.13 
_exptl_crystal_size_min           0.10 
_exptl_crystal_density_meas       ? 
_exptl_crystal_density_diffrn     1.289 
_exptl_crystal_density_method     'not measured' 
_exptl_crystal_F_000              3152 
_exptl_absorpt_coefficient_mu     0.794 
_exptl_absorpt_correction_type    Multi-scan 
_exptl_absorpt_correction_T_min   0.8447 
_exptl_absorpt_correction_T_max   0.9248 
_exptl_absorpt_process_details    'SORTAV (Blessing, 1995)'
 
_exptl_special_details 
; 
 ? 
; 
 
_diffrn_ambient_temperature       150(2) 
_diffrn_radiation_wavelength      0.71073 
_diffrn_radiation_type            MoK\a 
_diffrn_radiation_source          'fine-focus sealed tube' 
_diffrn_radiation_monochromator   graphite 
_diffrn_measurement_device_type  'Bruker Kappa CCD Diffractometer'
_diffrn_measurement_method       'omega and phi scans'
_diffrn_detector_area_resol_mean ?
_diffrn_standards_number         0
_diffrn_standards_interval_count 0
_diffrn_standards_interval_time  0
_diffrn_standards_decay_%        0
_diffrn_reflns_number             144388 
_diffrn_reflns_av_R_equivalents   0.0634 
_diffrn_reflns_av_sigmaI/netI     0.0364 
_diffrn_reflns_limit_h_min        -28 
_diffrn_reflns_limit_h_max        28 
_diffrn_reflns_limit_k_min        -28 
_diffrn_reflns_limit_k_max        28 
_diffrn_reflns_limit_l_min        -27 
_diffrn_reflns_limit_l_max        28 
_diffrn_reflns_theta_min          8.17 
_diffrn_reflns_theta_max          30.50 
_reflns_number_total              23190 
_reflns_number_gt                 19033 
_reflns_threshold_expression      >2sigma(I) 
 
_computing_data_collection       'Kappa CCD'
_computing_cell_refinement       'HKL Scalepack (Otwinowski & Minor 1997)'
_computing_data_reduction        'Denzo and Scalepak (Otwinowski & Minor, 1997)'
_computing_structure_solution    'SHELXS-86 (Sheldrick, 1986)'
_computing_structure_refinement  'SHELXL-97 (Sheldrick, 1997)'
_computing_molecular_graphics    'ORTEP 3 for Windows (Farrugia, 1997)'
_computing_publication_material  'SHELXL-97 (Sheldrick, 1997)'

_refine_special_details          
; 
 Refinement of F^2^ against ALL reflections.  The weighted R-factor wR and 
 goodness of fit S are based on F^2^, conventional R-factors R are based 
 on F, with F set to zero for negative F^2^. The threshold expression of 
 F^2^ > 2sigma(F^2^) is used only for calculating R-factors(gt) etc. and is 
 not relevant to the choice of reflections for refinement.  R-factors based 
 on F^2^ are statistically about twice as large as those based on F, and R- 
 factors based on ALL data will be even larger. 
;
 
_refine_ls_structure_factor_coef  Fsqd  
_refine_ls_matrix_type            full 
_refine_ls_weighting_scheme       calc  
_refine_ls_weighting_details 
 'calc w=1/[\s^2^(Fo^2^)+(0.0275P)^2^+4.1412P] where P=(Fo^2^+2Fc^2^)/3' 
_atom_sites_solution_primary      direct 
_atom_sites_solution_secondary    difmap 
_atom_sites_solution_hydrogens    geom 
_refine_ls_hydrogen_treatment     Constr 
_refine_ls_extinction_method      none 
_refine_ls_extinction_coef        ? 
_refine_ls_number_reflns          23190 
_refine_ls_number_parameters      845 
_refine_ls_number_restraints      0 
_refine_ls_R_factor_all           0.0431 
_refine_ls_R_factor_gt            0.0300 
_refine_ls_wR_factor_ref          0.0737 
_refine_ls_wR_factor_gt           0.0665 
_refine_ls_goodness_of_fit_ref    1.071 
_refine_ls_restrained_S_all       1.071 
_refine_ls_shift/su_max           0.008 
_refine_ls_shift/su_mean          0.000 
 
loop_ 
 _atom_site_label 
 _atom_site_type_symbol 
 _atom_site_fract_x 
 _atom_site_fract_y 
 _atom_site_fract_z 
 _atom_site_U_iso_or_equiv 
 _atom_site_adp_type 
 _atom_site_occupancy 
 _atom_site_symmetry_multiplicity 
 _atom_site_calc_flag 
 _atom_site_refinement_flags 
 _atom_site_disorder_assembly 
 _atom_site_disorder_group 
Ag1 Ag 0.297695(6) 0.984460(6) 0.168162(6) 0.01925(3) Uani 1 1 d . . . 
Ag2 Ag 0.216687(7) 0.950405(6) 0.278637(6) 0.02065(3) Uani 1 1 d . . . 
Ag3 Ag 0.229312(6) 1.090024(6) 0.233602(6) 0.01900(3) Uani 1 1 d . . . 
N1 N 0.33484(7) 0.89116(7) 0.21095(7) 0.0207(3) Uani 1 1 d . . . 
N2 N 0.29351(7) 0.84198(7) 0.21720(6) 0.0194(3) Uani 1 1 d . . . 
N3 N 0.23272(7) 0.86036(7) 0.22684(7) 0.0194(3) Uani 1 1 d . . . 
N4 N 0.20028(8) 1.00647(7) 0.36485(7) 0.0226(3) Uani 1 1 d . . . 
N5 N 0.22193(8) 1.06542(7) 0.38352(7) 0.0218(3) Uani 1 1 d . . . 
N6 N 0.24614(7) 1.10143(7) 0.33916(7) 0.0211(3) Uani 1 1 d . . . 
N7 N 0.20124(7) 1.11789(7) 0.13154(7) 0.0200(3) Uani 1 1 d . . . 
N8 N 0.23127(7) 1.10423(7) 0.08034(7) 0.0197(3) Uani 1 1 d . . . 
N9 N 0.27528(7) 1.05589(7) 0.08902(7) 0.0193(3) Uani 1 1 d . . . 
C1 C 0.40367(8) 0.87020(8) 0.20525(8) 0.0215(3) Uani 1 1 d . . . 
C2 C 0.42006(9) 0.85536(8) 0.14109(9) 0.0226(3) Uani 1 1 d . . . 
C3 C 0.48844(10) 0.84122(10) 0.13710(10) 0.0311(4) Uani 1 1 d . . . 
H3 H 0.5008 0.8311 0.0942 0.037 Uiso 1 1 calc R . . 
C4 C 0.53858(10) 0.84172(12) 0.19442(11) 0.0389(5) Uani 1 1 d . . . 
H4 H 0.5849 0.8326 0.1907 0.047 Uiso 1 1 calc R . . 
C5 C 0.52099(10) 0.85563(12) 0.25731(11) 0.0388(5) Uani 1 1 d . . . 
H5 H 0.5556 0.8556 0.2965 0.047 Uiso 1 1 calc R . . 
C6 C 0.45337(10) 0.86965(10) 0.26430(9) 0.0295(4) Uani 1 1 d . . . 
C7 C 0.36490(9) 0.85179(9) 0.07825(9) 0.0260(3) Uani 1 1 d . . . 
H7 H 0.3281 0.8843 0.0848 0.031 Uiso 1 1 calc R . . 
C8 C 0.39037(11) 0.87106(11) 0.01276(10) 0.0342(4) Uani 1 1 d . . . 
H8A H 0.4224 0.8369 0.0018 0.051 Uiso 1 1 calc R . . 
H8B H 0.4138 0.9144 0.0188 0.051 Uiso 1 1 calc R . . 
H8C H 0.3513 0.8743 -0.0244 0.051 Uiso 1 1 calc R . . 
C9 C 0.33245(13) 0.78228(12) 0.07137(11) 0.0415(5) Uani 1 1 d . . . 
H9A H 0.3146 0.7713 0.1129 0.062 Uiso 1 1 calc R . . 
H9B H 0.3671 0.7492 0.0641 0.062 Uiso 1 1 calc R . . 
H9C H 0.2949 0.7817 0.0326 0.062 Uiso 1 1 calc R . . 
C10 C 0.43506(11) 0.88475(12) 0.33345(10) 0.0375(5) Uani 1 1 d . . . 
H10 H 0.3843 0.8794 0.3294 0.045 Uiso 1 1 calc R . . 
C11 C 0.4517(2) 0.95668(18) 0.3534(2) 0.0843(11) Uani 1 1 d . . . 
H11A H 0.4260 0.9866 0.3194 0.126 Uiso 1 1 calc R . . 
H11B H 0.5009 0.9644 0.3557 0.126 Uiso 1 1 calc R . . 
H11C H 0.4389 0.9656 0.3979 0.126 Uiso 1 1 calc R . . 
C12 C 0.46829(16) 0.83537(18) 0.38781(12) 0.0641(8) Uani 1 1 d . . . 
H12A H 0.5180 0.8422 0.3963 0.096 Uiso 1 1 calc R . . 
H12B H 0.4581 0.7894 0.3720 0.096 Uiso 1 1 calc R . . 
H12C H 0.4500 0.8428 0.4299 0.096 Uiso 1 1 calc R . . 
C13 C 0.18639(9) 0.80450(8) 0.22670(8) 0.0213(3) Uani 1 1 d . . . 
C14 C 0.14121(9) 0.79001(9) 0.16616(9) 0.0238(3) Uani 1 1 d . . . 
C15 C 0.09619(10) 0.73663(10) 0.16643(10) 0.0321(4) Uani 1 1 d . . . 
H15 H 0.0656 0.7257 0.1260 0.039 Uiso 1 1 calc R . . 
C16 C 0.09520(11) 0.69914(11) 0.22446(11) 0.0375(5) Uani 1 1 d . . . 
H16 H 0.0645 0.6624 0.2235 0.045 Uiso 1 1 calc R . . 
C17 C 0.13868(11) 0.71489(10) 0.28381(11) 0.0359(4) Uani 1 1 d . . . 
H17 H 0.1372 0.6891 0.3235 0.043 Uiso 1 1 calc R . . 
C18 C 0.18498(10) 0.76828(9) 0.28647(9) 0.0273(4) Uani 1 1 d . . . 
C19 C 0.14062(10) 0.83319(10) 0.10347(9) 0.0287(4) Uani 1 1 d . . . 
H19 H 0.1892 0.8450 0.1006 0.034 Uiso 1 1 calc R . . 
C20 C 0.10172(13) 0.89839(11) 0.10962(11) 0.0392(5) Uani 1 1 d . . . 
H20A H 0.1225 0.9221 0.1509 0.059 Uiso 1 1 calc R . . 
H20B H 0.0537 0.8883 0.1119 0.059 Uiso 1 1 calc R . . 
H20C H 0.1041 0.9266 0.0699 0.059 Uiso 1 1 calc R . . 
C21 C 0.11045(14) 0.79694(12) 0.03784(10) 0.0427(5) Uani 1 1 d . . . 
H21A H 0.0611 0.7903 0.0365 0.064 Uiso 1 1 calc R . . 
H21B H 0.1330 0.7534 0.0363 0.064 Uiso 1 1 calc R . . 
H21C H 0.1179 0.8239 -0.0013 0.064 Uiso 1 1 calc R . . 
C22 C 0.23250(11) 0.78496(10) 0.35222(9) 0.0329(4) Uani 1 1 d . . . 
H22 H 0.2471 0.8327 0.3493 0.039 Uiso 1 1 calc R . . 
C23 C 0.29681(13) 0.74181(13) 0.36045(12) 0.0450(5) Uani 1 1 d . . . 
H23A H 0.3207 0.7492 0.3219 0.067 Uiso 1 1 calc R . . 
H23B H 0.2840 0.6945 0.3621 0.067 Uiso 1 1 calc R . . 
H23C H 0.3271 0.7539 0.4027 0.067 Uiso 1 1 calc R . . 
C24 C 0.19612(14) 0.77875(12) 0.41386(11) 0.0440(5) Uani 1 1 d . . . 
H24A H 0.2254 0.7974 0.4539 0.066 Uiso 1 1 calc R . . 
H24B H 0.1870 0.7315 0.4219 0.066 Uiso 1 1 calc R . . 
H24C H 0.1527 0.8034 0.4052 0.066 Uiso 1 1 calc R . . 
C25 C 0.17630(11) 0.97107(9) 0.41982(9) 0.0273(4) Uani 1 1 d . . . 
C26 C 0.10598(12) 0.95738(10) 0.41317(11) 0.0347(4) Uani 1 1 d . . . 
C27 C 0.08280(14) 0.92544(12) 0.46787(13) 0.0467(6) Uani 1 1 d . . . 
H27 H 0.0355 0.9151 0.4649 0.056 Uiso 1 1 calc R . . 
C28 C 0.12809(17) 0.90890(12) 0.52581(13) 0.0530(7) Uani 1 1 d . . . 
H28 H 0.1114 0.8889 0.5630 0.064 Uiso 1 1 calc R . . 
C29 C 0.19723(15) 0.92111(11) 0.53030(11) 0.0452(6) Uani 1 1 d . . . 
H29 H 0.2276 0.9083 0.5702 0.054 Uiso 1 1 calc R . . 
C30 C 0.22361(12) 0.95194(9) 0.47732(9) 0.0330(4) Uani 1 1 d . . . 
C31 C 0.05654(11) 0.97546(12) 0.34900(12) 0.0390(5) Uani 1 1 d . . . 
H31 H 0.0796 1.0100 0.3243 0.047 Uiso 1 1 calc R . . 
C32 C 0.04290(16) 0.91464(15) 0.30234(14) 0.0561(7) Uani 1 1 d . . . 
H32A H 0.0209 0.8794 0.3253 0.084 Uiso 1 1 calc R . . 
H32B H 0.0864 0.8979 0.2915 0.084 Uiso 1 1 calc R . . 
H32C H 0.0127 0.9276 0.2603 0.084 Uiso 1 1 calc R . . 
C33 C -0.01027(16) 1.0060(2) 0.36362(18) 0.0702(9) Uani 1 1 d . . . 
H33A H 0.0001 1.0434 0.3955 0.105 Uiso 1 1 calc R . . 
H33B H -0.0365 0.9719 0.3835 0.105 Uiso 1 1 calc R . . 
H33C H -0.0373 1.0224 0.3212 0.105 Uiso 1 1 calc R . . 
C34 C 0.30014(12) 0.96396(11) 0.48265(10) 0.0374(5) Uani 1 1 d . . . 
H34 H 0.3096 0.9728 0.4358 0.045 Uiso 1 1 calc R . . 
C35 C 0.32319(17) 1.02570(14) 0.52600(13) 0.0569(7) Uani 1 1 d . . . 
H35A H 0.3725 1.0325 0.5278 0.085 Uiso 1 1 calc R . . 
H35B H 0.3135 1.0189 0.5721 0.085 Uiso 1 1 calc R . . 
H35C H 0.2983 1.0652 0.5059 0.085 Uiso 1 1 calc R . . 
C36 C 0.34274(16) 0.90301(13) 0.51046(14) 0.0534(6) Uani 1 1 d . . . 
H36A H 0.3360 0.8943 0.5572 0.080 Uiso 1 1 calc R . . 
H36B H 0.3914 0.9119 0.5099 0.080 Uiso 1 1 calc R . . 
H36C H 0.3281 0.8639 0.4821 0.080 Uiso 1 1 calc R . . 
C37 C 0.26483(9) 1.16764(9) 0.36459(8) 0.0237(3) Uani 1 1 d . . . 
C38 C 0.21338(11) 1.21504(10) 0.36807(10) 0.0320(4) Uani 1 1 d . . . 
C39 C 0.23401(14) 1.27799(11) 0.39403(13) 0.0463(5) Uani 1 1 d . . . 
H39 H 0.2002 1.3110 0.3976 0.056 Uiso 1 1 calc R . . 
C40 C 0.30191(14) 1.29339(12) 0.41460(13) 0.0494(6) Uani 1 1 d . . . 
H40 H 0.3145 1.3363 0.4331 0.059 Uiso 1 1 calc R . . 
C41 C 0.35179(12) 1.24699(11) 0.40853(11) 0.0405(5) Uani 1 1 d . . . 
H41 H 0.3987 1.2587 0.4219 0.049 Uiso 1 1 calc R . . 
C42 C 0.33481(10) 1.18288(10) 0.38297(9) 0.0292(4) Uani 1 1 d . . . 
C43 C 0.13781(11) 1.19990(11) 0.34505(12) 0.0392(5) Uani 1 1 d . . . 
H43 H 0.1351 1.1583 0.3169 0.047 Uiso 1 1 calc R . . 
C44 C 0.10071(14) 1.25496(14) 0.30031(14) 0.0537(6) Uani 1 1 d . . . 
H44A H 0.0972 1.2951 0.3278 0.081 Uiso 1 1 calc R . . 
H44B H 0.0546 1.2396 0.2806 0.081 Uiso 1 1 calc R . . 
H44C H 0.1264 1.2656 0.2638 0.081 Uiso 1 1 calc R . . 
C45 C 0.10228(14) 1.18503(17) 0.40540(16) 0.0606(7) Uani 1 1 d . . . 
H45A H 0.0540 1.1741 0.3891 0.091 Uiso 1 1 calc R . . 
H45B H 0.1051 1.2244 0.4350 0.091 Uiso 1 1 calc R . . 
H45C H 0.1248 1.1470 0.4310 0.091 Uiso 1 1 calc R . . 
C46 C 0.38955(10) 1.13223(12) 0.37352(11) 0.0368(4) Uani 1 1 d . . . 
H46 H 0.3693 1.0866 0.3756 0.044 Uiso 1 1 calc R . . 
C47 C 0.40981(14) 1.14034(15) 0.30341(14) 0.0535(6) Uani 1 1 d . . . 
H47A H 0.4278 1.1856 0.2991 0.080 Uiso 1 1 calc R . . 
H47B H 0.3695 1.1333 0.2683 0.080 Uiso 1 1 calc R . . 
H47C H 0.4451 1.1074 0.2978 0.080 Uiso 1 1 calc R . . 
C48 C 0.45319(15) 1.13607(19) 0.42861(18) 0.0707(9) Uani 1 1 d . . . 
H48A H 0.4396 1.1311 0.4734 0.106 Uiso 1 1 calc R . . 
H48B H 0.4757 1.1795 0.4260 0.106 Uiso 1 1 calc R . . 
H48C H 0.4850 1.1001 0.4217 0.106 Uiso 1 1 calc R . . 
C49 C 0.15454(9) 1.17365(8) 0.11951(8) 0.0231(3) Uani 1 1 d . . . 
C50 C 0.08506(10) 1.16075(10) 0.12053(9) 0.0278(4) Uani 1 1 d . . . 
C51 C 0.03919(12) 1.21462(12) 0.11042(11) 0.0399(5) Uani 1 1 d . . . 
H51 H -0.0082 1.2072 0.1110 0.048 Uiso 1 1 calc R . . 
C52 C 0.06188(14) 1.27788(12) 0.09973(12) 0.0483(6) Uani 1 1 d . . . 
H52 H 0.0300 1.3137 0.0917 0.058 Uiso 1 1 calc R . . 
C53 C 0.13077(15) 1.29009(11) 0.10047(12) 0.0469(6) Uani 1 1 d . . . 
H53 H 0.1455 1.3345 0.0936 0.056 Uiso 1 1 calc R . . 
C54 C 0.17946(11) 1.23864(10) 0.11105(10) 0.0340(4) Uani 1 1 d . . . 
C55 C 0.05942(10) 1.09023(10) 0.12932(10) 0.0313(4) Uani 1 1 d . . . 
H55 H 0.1004 1.0613 0.1447 0.038 Uiso 1 1 calc R . . 
C56 C 0.02329(14) 1.06279(14) 0.06177(12) 0.0483(6) Uani 1 1 d . . . 
H56A H 0.0549 1.0632 0.0289 0.072 Uiso 1 1 calc R . . 
H56B H -0.0167 1.0907 0.0449 0.072 Uiso 1 1 calc R . . 
H56C H 0.0083 1.0168 0.0680 0.072 Uiso 1 1 calc R . . 
C57 C 0.01265(14) 1.08551(15) 0.18306(13) 0.0508(6) Uani 1 1 d . . . 
H57A H -0.0287 1.1124 0.1687 0.076 Uiso 1 1 calc R . . 
H57B H 0.0370 1.1025 0.2265 0.076 Uiso 1 1 calc R . . 
H57C H -0.0003 1.0387 0.1884 0.076 Uiso 1 1 calc R . . 
C58 C 0.25544(13) 1.25309(11) 0.11807(14) 0.0455(5) Uani 1 1 d . . . 
H58 H 0.2778 1.2123 0.1026 0.055 Uiso 1 1 calc R . . 
C59 C 0.28540(19) 1.2642(2) 0.19212(18) 0.0846(12) Uani 1 1 d . . . 
H59A H 0.2738 1.2262 0.2191 0.127 Uiso 1 1 calc R . . 
H59B H 0.2665 1.3054 0.2082 0.127 Uiso 1 1 calc R . . 
H59C H 0.3354 1.2682 0.1970 0.127 Uiso 1 1 calc R . . 
C60 C 0.27344(18) 1.31187(15) 0.07571(16) 0.0623(7) Uani 1 1 d . . . 
H60A H 0.3234 1.3152 0.0797 0.093 Uiso 1 1 calc R . . 
H60B H 0.2554 1.3533 0.0922 0.093 Uiso 1 1 calc R . . 
H60C H 0.2531 1.3049 0.0280 0.093 Uiso 1 1 calc R . . 
C61 C 0.31015(9) 1.04852(8) 0.03116(8) 0.0198(3) Uani 1 1 d . . . 
C62 C 0.27618(9) 1.02103(9) -0.02998(8) 0.0236(3) Uani 1 1 d . . . 
C63 C 0.31270(10) 1.01644(9) -0.08420(9) 0.0289(4) Uani 1 1 d . . . 
H63 H 0.2906 0.9990 -0.1265 0.035 Uiso 1 1 calc R . . 
C64 C 0.38028(11) 1.03689(10) -0.07722(10) 0.0317(4) Uani 1 1 d . . . 
H64 H 0.4040 1.0339 -0.1148 0.038 Uiso 1 1 calc R . . 
C65 C 0.41351(10) 1.06170(10) -0.01587(10) 0.0301(4) Uani 1 1 d . . . 
H65 H 0.4604 1.0741 -0.0113 0.036 Uiso 1 1 calc R . . 
C66 C 0.37913(9) 1.06881(9) 0.03966(9) 0.0241(3) Uani 1 1 d . . . 
C67 C 0.20206(10) 0.99794(10) -0.03873(9) 0.0276(4) Uani 1 1 d . . . 
H67 H 0.1894 0.9938 0.0075 0.033 Uiso 1 1 calc R . . 
C68 C 0.19228(13) 0.92921(12) -0.07280(13) 0.0431(5) Uani 1 1 d . . . 
H68A H 0.2225 0.8966 -0.0461 0.065 Uiso 1 1 calc R . . 
H68B H 0.2036 0.9320 -0.1187 0.065 Uiso 1 1 calc R . . 
H68C H 0.1445 0.9150 -0.0755 0.065 Uiso 1 1 calc R . . 
C69 C 0.15422(12) 1.04936(12) -0.07829(13) 0.0420(5) Uani 1 1 d . . . 
H69A H 0.1668 1.0558 -0.1233 0.063 Uiso 1 1 calc R . . 
H69B H 0.1583 1.0920 -0.0537 0.063 Uiso 1 1 calc R . . 
H69C H 0.1068 1.0333 -0.0834 0.063 Uiso 1 1 calc R . . 
C70 C 0.41535(10) 1.09831(10) 0.10603(10) 0.0301(4) Uani 1 1 d . . . 
H70 H 0.3809 1.1014 0.1374 0.036 Uiso 1 1 calc R . . 
C71 C 0.47277(15) 1.05321(15) 0.13954(15) 0.0610(8) Uani 1 1 d . . . 
H71A H 0.5082 1.0502 0.1107 0.092 Uiso 1 1 calc R . . 
H71B H 0.4545 1.0085 0.1458 0.092 Uiso 1 1 calc R . . 
H71C H 0.4928 1.0718 0.1838 0.092 Uiso 1 1 calc R . . 
C72 C 0.44127(16) 1.16916(13) 0.09631(14) 0.0544(6) Uani 1 1 d . . . 
H72A H 0.4036 1.1965 0.0727 0.082 Uiso 1 1 calc R . . 
H72B H 0.4783 1.1674 0.0693 0.082 Uiso 1 1 calc R . . 
H72C H 0.4586 1.1890 0.1407 0.082 Uiso 1 1 calc R . . 
C1S C 0.33507(19) 0.5938(2) 0.22207(14) 0.0710(9) Uani 1 1 d . . . 
C2S C 0.2658(2) 0.6060(2) 0.21822(14) 0.0736(10) Uani 1 1 d . . . 
H2S H 0.2494 0.6508 0.2148 0.088 Uiso 1 1 calc R . . 
C3S C 0.2206(2) 0.5549(2) 0.21929(16) 0.0758(10) Uani 1 1 d . . . 
H3S H 0.1733 0.5646 0.2174 0.091 Uiso 1 1 calc R . . 
C4S C 0.2422(2) 0.4901(2) 0.22304(15) 0.0790(10) Uani 1 1 d . . . 
H4S H 0.2100 0.4548 0.2227 0.095 Uiso 1 1 calc R . . 
C5S C 0.3111(2) 0.4760(2) 0.22733(16) 0.0781(10) Uani 1 1 d . . . 
H5S H 0.3264 0.4308 0.2306 0.094 Uiso 1 1 calc R . . 
C6S C 0.3574(2) 0.5267(2) 0.22683(15) 0.0769(11) Uani 1 1 d . . . 
H6S H 0.4047 0.5167 0.2297 0.092 Uiso 1 1 calc R . . 
C7S C 0.3833(3) 0.6483(3) 0.2217(3) 0.1129(16) Uani 1 1 d . . . 
H7S1 H 0.4148 0.6493 0.2651 0.169 Uiso 1 1 calc R . . 
H7S2 H 0.3584 0.6908 0.2151 0.169 Uiso 1 1 calc R . . 
H7S3 H 0.4095 0.6417 0.1847 0.169 Uiso 1 1 calc R . . 
 
loop_ 
 _atom_site_aniso_label 
 _atom_site_aniso_U_11 
 _atom_site_aniso_U_22 
 _atom_site_aniso_U_33 
 _atom_site_aniso_U_23 
 _atom_site_aniso_U_13 
 _atom_site_aniso_U_12 
Ag1 0.02174(6) 0.01643(6) 0.02028(6) 0.00367(4) 0.00553(4) 0.00292(4) 
Ag2 0.02703(6) 0.01691(6) 0.01938(6) -0.00215(4) 0.00786(5) 0.00038(4) 
Ag3 0.02400(6) 0.01825(6) 0.01477(5) -0.00023(4) 0.00328(4) 0.00100(4) 
N1 0.0225(7) 0.0188(6) 0.0211(6) 0.0030(5) 0.0050(5) 0.0028(5) 
N2 0.0248(7) 0.0185(6) 0.0153(6) 0.0009(5) 0.0042(5) 0.0021(5) 
N3 0.0228(6) 0.0168(6) 0.0196(6) 0.0004(5) 0.0062(5) -0.0004(5) 
N4 0.0335(8) 0.0176(6) 0.0183(6) -0.0013(5) 0.0085(6) 0.0009(6) 
N5 0.0280(7) 0.0200(7) 0.0173(6) -0.0017(5) 0.0035(5) 0.0020(6) 
N6 0.0269(7) 0.0193(6) 0.0165(6) -0.0040(5) 0.0022(5) -0.0011(5) 
N7 0.0238(7) 0.0195(6) 0.0167(6) 0.0009(5) 0.0035(5) 0.0050(5) 
N8 0.0230(6) 0.0175(6) 0.0189(6) 0.0009(5) 0.0047(5) 0.0010(5) 
N9 0.0231(6) 0.0176(6) 0.0183(6) 0.0033(5) 0.0070(5) 0.0021(5) 
C1 0.0206(7) 0.0186(7) 0.0255(8) 0.0017(6) 0.0041(6) 0.0030(6) 
C2 0.0228(8) 0.0186(8) 0.0265(8) 0.0012(6) 0.0048(6) 0.0017(6) 
C3 0.0276(9) 0.0366(10) 0.0309(9) 0.0000(8) 0.0103(7) 0.0050(8) 
C4 0.0238(9) 0.0529(13) 0.0402(11) -0.0001(9) 0.0064(8) 0.0103(9) 
C5 0.0266(9) 0.0534(13) 0.0338(10) -0.0024(9) -0.0028(8) 0.0110(9) 
C6 0.0281(9) 0.0324(10) 0.0270(8) -0.0010(7) 0.0016(7) 0.0083(7) 
C7 0.0263(8) 0.0274(9) 0.0247(8) -0.0031(6) 0.0057(7) 0.0017(7) 
C8 0.0364(10) 0.0404(11) 0.0261(9) 0.0014(8) 0.0055(8) 0.0037(9) 
C9 0.0475(12) 0.0408(12) 0.0369(11) -0.0098(9) 0.0089(9) -0.0154(10) 
C10 0.0349(10) 0.0511(13) 0.0250(9) -0.0032(8) 0.0005(8) 0.0167(9) 
C11 0.127(3) 0.061(2) 0.075(2) -0.0311(16) 0.047(2) -0.006(2) 
C12 0.0686(18) 0.092(2) 0.0307(11) 0.0096(12) 0.0061(11) 0.0430(17) 
C13 0.0268(8) 0.0153(7) 0.0233(7) -0.0001(6) 0.0090(6) 0.0004(6) 
C14 0.0256(8) 0.0222(8) 0.0252(8) -0.0007(6) 0.0086(6) -0.0005(6) 
C15 0.0297(9) 0.0317(10) 0.0349(10) -0.0021(8) 0.0053(8) -0.0075(8) 
C16 0.0380(11) 0.0291(10) 0.0471(12) 0.0043(8) 0.0117(9) -0.0118(8) 
C17 0.0441(11) 0.0290(10) 0.0364(10) 0.0102(8) 0.0122(9) -0.0056(8) 
C18 0.0343(9) 0.0213(8) 0.0271(8) 0.0038(6) 0.0073(7) 0.0026(7) 
C19 0.0327(9) 0.0312(9) 0.0220(8) 0.0013(7) 0.0042(7) -0.0040(7) 
C20 0.0532(13) 0.0323(10) 0.0298(10) 0.0035(8) -0.0003(9) 0.0026(9) 
C21 0.0591(14) 0.0448(13) 0.0241(9) -0.0039(8) 0.0069(9) -0.0050(11) 
C22 0.0495(12) 0.0259(9) 0.0231(8) 0.0070(7) 0.0053(8) -0.0020(8) 
C23 0.0474(13) 0.0514(14) 0.0338(11) 0.0058(9) 0.0000(9) 0.0052(11) 
C24 0.0670(15) 0.0385(12) 0.0275(10) 0.0052(8) 0.0107(10) 0.0057(11) 
C25 0.0456(11) 0.0173(8) 0.0224(8) -0.0001(6) 0.0151(7) 0.0012(7) 
C26 0.0470(12) 0.0256(9) 0.0368(10) 0.0001(7) 0.0220(9) 0.0006(8) 
C27 0.0625(15) 0.0346(11) 0.0516(13) 0.0053(10) 0.0345(12) -0.0022(11) 
C28 0.092(2) 0.0373(12) 0.0402(12) 0.0113(9) 0.0408(13) 0.0074(12) 
C29 0.0769(17) 0.0358(11) 0.0272(10) 0.0072(8) 0.0211(11) 0.0138(11) 
C30 0.0574(13) 0.0232(9) 0.0213(8) 0.0012(6) 0.0147(8) 0.0081(8) 
C31 0.0337(10) 0.0413(12) 0.0455(12) 0.0039(9) 0.0172(9) -0.0034(9) 
C32 0.0652(17) 0.0563(16) 0.0485(14) -0.0011(12) 0.0148(13) -0.0115(13) 
C33 0.0461(15) 0.096(2) 0.072(2) 0.0015(17) 0.0219(14) 0.0169(16) 
C34 0.0514(13) 0.0362(11) 0.0230(8) 0.0009(7) 0.0015(8) 0.0095(9) 
C35 0.0744(18) 0.0470(14) 0.0427(13) -0.0112(11) -0.0100(12) 0.0096(13) 
C36 0.0659(17) 0.0446(14) 0.0476(13) 0.0072(10) 0.0037(12) 0.0194(12) 
C37 0.0311(9) 0.0225(8) 0.0173(7) -0.0048(6) 0.0034(6) -0.0043(7) 
C38 0.0376(10) 0.0241(9) 0.0347(9) -0.0081(7) 0.0075(8) -0.0003(8) 
C39 0.0543(14) 0.0271(10) 0.0589(14) -0.0154(10) 0.0137(11) 0.0007(10) 
C40 0.0622(15) 0.0302(11) 0.0564(14) -0.0190(10) 0.0121(12) -0.0149(11) 
C41 0.0421(11) 0.0396(12) 0.0399(11) -0.0111(9) 0.0073(9) -0.0184(9) 
C42 0.0341(9) 0.0305(9) 0.0228(8) -0.0038(7) 0.0040(7) -0.0053(8) 
C43 0.0347(10) 0.0326(11) 0.0498(12) -0.0082(9) 0.0059(9) 0.0058(8) 
C44 0.0510(14) 0.0503(15) 0.0566(15) 0.0019(11) 0.0001(12) 0.0126(12) 
C45 0.0395(13) 0.075(2) 0.0704(18) 0.0158(15) 0.0178(13) 0.0092(13) 
C46 0.0279(9) 0.0402(11) 0.0403(11) -0.0089(9) -0.0002(8) -0.0028(8) 
C47 0.0481(14) 0.0596(16) 0.0577(15) -0.0082(12) 0.0235(12) 0.0022(12) 
C48 0.0446(15) 0.082(2) 0.0741(19) -0.0171(16) -0.0244(14) 0.0070(14) 
C49 0.0312(9) 0.0208(8) 0.0167(7) -0.0004(6) 0.0024(6) 0.0085(7) 
C50 0.0290(9) 0.0303(9) 0.0227(8) -0.0042(7) 0.0003(7) 0.0095(7) 
C51 0.0359(11) 0.0456(12) 0.0362(10) -0.0062(9) -0.0003(8) 0.0196(9) 
C52 0.0604(15) 0.0380(12) 0.0442(12) -0.0007(9) 0.0021(11) 0.0303(11) 
C53 0.0689(16) 0.0241(10) 0.0474(12) 0.0053(9) 0.0085(11) 0.0166(10) 
C54 0.0458(11) 0.0247(9) 0.0316(9) 0.0029(7) 0.0072(8) 0.0059(8) 
C55 0.0213(8) 0.0355(10) 0.0358(10) -0.0048(8) 0.0008(7) 0.0043(7) 
C56 0.0540(14) 0.0538(14) 0.0376(11) -0.0180(10) 0.0090(10) -0.0106(12) 
C57 0.0556(15) 0.0604(16) 0.0381(12) -0.0058(11) 0.0132(11) -0.0070(12) 
C58 0.0505(13) 0.0229(10) 0.0643(15) 0.0056(9) 0.0130(11) -0.0019(9) 
C59 0.067(2) 0.104(3) 0.074(2) 0.040(2) -0.0140(16) -0.0408(19) 
C60 0.082(2) 0.0496(16) 0.0590(16) 0.0109(12) 0.0232(15) -0.0123(14) 
C61 0.0252(8) 0.0161(7) 0.0203(7) 0.0036(5) 0.0099(6) 0.0040(6) 
C62 0.0298(8) 0.0209(8) 0.0216(7) 0.0020(6) 0.0090(6) 0.0001(7) 
C63 0.0385(10) 0.0277(9) 0.0227(8) 0.0004(7) 0.0111(7) 0.0021(8) 
C64 0.0378(10) 0.0313(10) 0.0307(9) 0.0053(7) 0.0194(8) 0.0068(8) 
C65 0.0259(9) 0.0294(9) 0.0382(10) 0.0062(7) 0.0147(8) 0.0025(7) 
C66 0.0243(8) 0.0207(8) 0.0285(8) 0.0053(6) 0.0079(7) 0.0019(6) 
C67 0.0310(9) 0.0287(9) 0.0243(8) -0.0015(7) 0.0082(7) -0.0046(7) 
C68 0.0450(12) 0.0340(11) 0.0510(13) -0.0117(9) 0.0096(10) -0.0101(9) 
C69 0.0329(10) 0.0404(12) 0.0521(13) 0.0099(10) 0.0052(9) -0.0012(9) 
C70 0.0241(8) 0.0328(10) 0.0340(9) -0.0023(7) 0.0062(7) -0.0033(7) 
C71 0.0570(16) 0.0557(16) 0.0593(16) -0.0084(12) -0.0224(13) 0.0172(13) 
C72 0.0683(17) 0.0398(13) 0.0568(15) -0.0082(11) 0.0151(13) -0.0198(12) 
C1S 0.073(2) 0.099(3) 0.0374(14) -0.0149(14) -0.0015(13) 0.0125(19) 
C2S 0.077(2) 0.101(3) 0.0392(14) -0.0105(15) 0.0004(14) 0.035(2) 
C3S 0.077(2) 0.105(3) 0.0441(15) -0.0114(16) 0.0059(15) 0.020(2) 
C4S 0.093(3) 0.103(3) 0.0392(15) -0.0091(16) 0.0052(15) 0.021(2) 
C5S 0.085(2) 0.097(3) 0.0478(16) -0.0176(17) -0.0008(16) 0.026(2) 
C6S 0.073(2) 0.110(3) 0.0430(15) -0.0192(17) -0.0038(14) 0.034(2) 
C7S 0.094(3) 0.149(5) 0.092(3) 0.000(3) 0.005(2) 0.023(3) 
 
_geom_special_details 
; 
 All esds (except the esd in the dihedral angle between two l.s. planes) 
 are estimated using the full covariance matrix.  The cell esds are taken 
 into account individually in the estimation of esds in distances, angles 
 and torsion angles; correlations between esds in cell parameters are only 
 used when they are defined by crystal symmetry.  An approximate (isotropic) 
 treatment of cell esds is used for estimating esds involving l.s. planes. 
; 
 
loop_ 
 _geom_bond_atom_site_label_1 
 _geom_bond_atom_site_label_2 
 _geom_bond_distance 
 _geom_bond_site_symmetry_2 
 _geom_bond_publ_flag 
Ag1 N9 2.1204(13) . ? 
Ag1 N1 2.1291(14) . ? 
Ag1 Ag3 2.92748(17) . ? 
Ag1 Ag2 3.01186(17) . ? 
Ag2 N4 2.1233(14) . ? 
Ag2 N3 2.1245(13) . ? 
Ag2 Ag3 2.95330(17) . ? 
Ag3 N6 2.0907(13) . ? 
Ag3 N7 2.0963(13) . ? 
N1 N2 1.297(2) . ? 
N1 C1 1.447(2) . ? 
N2 N3 1.3017(19) . ? 
N3 C13 1.444(2) . ? 
N4 N5 1.287(2) . ? 
N4 C25 1.450(2) . ? 
N5 N6 1.293(2) . ? 
N6 C37 1.442(2) . ? 
N7 N8 1.2939(19) . ? 
N7 C49 1.441(2) . ? 
N8 N9 1.2922(19) . ? 
N9 C61 1.448(2) . ? 
C1 C6 1.404(2) . ? 
C1 C2 1.404(2) . ? 
C2 C3 1.397(2) . ? 
C2 C7 1.521(2) . ? 
C3 C4 1.384(3) . ? 
C3 H3 0.9500 . ? 
C4 C5 1.386(3) . ? 
C4 H4 0.9500 . ? 
C5 C6 1.396(3) . ? 
C5 H5 0.9500 . ? 
C6 C10 1.515(3) . ? 
C7 C9 1.526(3) . ? 
C7 C8 1.527(3) . ? 
C7 H7 1.0000 . ? 
C8 H8A 0.9800 . ? 
C8 H8B 0.9800 . ? 
C8 H8C 0.9800 . ? 
C9 H9A 0.9800 . ? 
C9 H9B 0.9800 . ? 
C9 H9C 0.9800 . ? 
C10 C11 1.512(4) . ? 
C10 C12 1.531(3) . ? 
C10 H10 1.0000 . ? 
C11 H11A 0.9800 . ? 
C11 H11B 0.9800 . ? 
C11 H11C 0.9800 . ? 
C12 H12A 0.9800 . ? 
C12 H12B 0.9800 . ? 
C12 H12C 0.9800 . ? 
C13 C18 1.400(2) . ? 
C13 C14 1.409(2) . ? 
C14 C15 1.390(3) . ? 
C14 C19 1.519(2) . ? 
C15 C16 1.383(3) . ? 
C15 H15 0.9500 . ? 
C16 C17 1.380(3) . ? 
C16 H16 0.9500 . ? 
C17 C18 1.401(3) . ? 
C17 H17 0.9500 . ? 
C18 C22 1.519(3) . ? 
C19 C20 1.528(3) . ? 
C19 C21 1.529(3) . ? 
C19 H19 1.0000 . ? 
C20 H20A 0.9800 . ? 
C20 H20B 0.9800 . ? 
C20 H20C 0.9800 . ? 
C21 H21A 0.9800 . ? 
C21 H21B 0.9800 . ? 
C21 H21C 0.9800 . ? 
C22 C23 1.522(3) . ? 
C22 C24 1.531(3) . ? 
C22 H22 1.0000 . ? 
C23 H23A 0.9800 . ? 
C23 H23B 0.9800 . ? 
C23 H23C 0.9800 . ? 
C24 H24A 0.9800 . ? 
C24 H24B 0.9800 . ? 
C24 H24C 0.9800 . ? 
C25 C26 1.402(3) . ? 
C25 C30 1.408(3) . ? 
C26 C27 1.406(3) . ? 
C26 C31 1.520(3) . ? 
C27 C28 1.380(4) . ? 
C27 H27 0.9500 . ? 
C28 C29 1.377(4) . ? 
C28 H28 0.9500 . ? 
C29 C30 1.398(3) . ? 
C29 H29 0.9500 . ? 
C30 C34 1.519(3) . ? 
C31 C33 1.527(4) . ? 
C31 C32 1.527(4) . ? 
C31 H31 1.0000 . ? 
C32 H32A 0.9800 . ? 
C32 H32B 0.9800 . ? 
C32 H32C 0.9800 . ? 
C33 H33A 0.9800 . ? 
C33 H33B 0.9800 . ? 
C33 H33C 0.9800 . ? 
C34 C36 1.531(3) . ? 
C34 C35 1.532(3) . ? 
C34 H34 1.0000 . ? 
C35 H35A 0.9800 . ? 
C35 H35B 0.9800 . ? 
C35 H35C 0.9800 . ? 
C36 H36A 0.9800 . ? 
C36 H36B 0.9800 . ? 
C36 H36C 0.9800 . ? 
C37 C38 1.400(3) . ? 
C37 C42 1.405(3) . ? 
C38 C39 1.395(3) . ? 
C38 C43 1.519(3) . ? 
C39 C40 1.372(4) . ? 
C39 H39 0.9500 . ? 
C40 C41 1.374(4) . ? 
C40 H40 0.9500 . ? 
C41 C42 1.398(3) . ? 
C41 H41 0.9500 . ? 
C42 C46 1.516(3) . ? 
C43 C45 1.522(4) . ? 
C43 C44 1.526(3) . ? 
C43 H43 1.0000 . ? 
C44 H44A 0.9800 . ? 
C44 H44B 0.9800 . ? 
C44 H44C 0.9800 . ? 
C45 H45A 0.9800 . ? 
C45 H45B 0.9800 . ? 
C45 H45C 0.9800 . ? 
C46 C47 1.527(4) . ? 
C46 C48 1.530(3) . ? 
C46 H46 1.0000 . ? 
C47 H47A 0.9800 . ? 
C47 H47B 0.9800 . ? 
C47 H47C 0.9800 . ? 
C48 H48A 0.9800 . ? 
C48 H48B 0.9800 . ? 
C48 H48C 0.9800 . ? 
C49 C50 1.402(3) . ? 
C49 C54 1.409(3) . ? 
C50 C51 1.400(3) . ? 
C50 C55 1.517(3) . ? 
C51 C52 1.369(4) . ? 
C51 H51 0.9500 . ? 
C52 C53 1.382(4) . ? 
C52 H52 0.9500 . ? 
C53 C54 1.400(3) . ? 
C53 H53 0.9500 . ? 
C54 C58 1.514(3) . ? 
C55 C56 1.520(3) . ? 
C55 C57 1.532(3) . ? 
C55 H55 1.0000 . ? 
C56 H56A 0.9800 . ? 
C56 H56B 0.9800 . ? 
C56 H56C 0.9800 . ? 
C57 H57A 0.9800 . ? 
C57 H57B 0.9800 . ? 
C57 H57C 0.9800 . ? 
C58 C59 1.515(4) . ? 
C58 C60 1.523(3) . ? 
C58 H58 1.0000 . ? 
C59 H59A 0.9800 . ? 
C59 H59B 0.9800 . ? 
C59 H59C 0.9800 . ? 
C60 H60A 0.9800 . ? 
C60 H60B 0.9800 . ? 
C60 H60C 0.9800 . ? 
C61 C62 1.404(2) . ? 
C61 C66 1.406(2) . ? 
C62 C63 1.401(2) . ? 
C62 C67 1.519(3) . ? 
C63 C64 1.382(3) . ? 
C63 H63 0.9500 . ? 
C64 C65 1.382(3) . ? 
C64 H64 0.9500 . ? 
C65 C66 1.401(3) . ? 
C65 H65 0.9500 . ? 
C66 C70 1.517(3) . ? 
C67 C69 1.525(3) . ? 
C67 C68 1.530(3) . ? 
C67 H67 1.0000 . ? 
C68 H68A 0.9800 . ? 
C68 H68B 0.9800 . ? 
C68 H68C 0.9800 . ? 
C69 H69A 0.9800 . ? 
C69 H69B 0.9800 . ? 
C69 H69C 0.9800 . ? 
C70 C71 1.515(3) . ? 
C70 C72 1.528(3) . ? 
C70 H70 1.0000 . ? 
C71 H71A 0.9800 . ? 
C71 H71B 0.9800 . ? 
C71 H71C 0.9800 . ? 
C72 H72A 0.9800 . ? 
C72 H72B 0.9800 . ? 
C72 H72C 0.9800 . ? 
C1S C2S 1.382(5) . ? 
C1S C6S 1.410(5) . ? 
C1S C7S 1.449(7) . ? 
C2S C3S 1.358(6) . ? 
C2S H2S 0.9500 . ? 
C3S C4S 1.361(6) . ? 
C3S H3S 0.9500 . ? 
C4S C5S 1.381(5) . ? 
C4S H4S 0.9500 . ? 
C5S C6S 1.366(6) . ? 
C5S H5S 0.9500 . ? 
C6S H6S 0.9500 . ? 
C7S H7S1 0.9800 . ? 
C7S H7S2 0.9800 . ? 
C7S H7S3 0.9800 . ? 
 
loop_ 
 _geom_angle_atom_site_label_1 
 _geom_angle_atom_site_label_2 
 _geom_angle_atom_site_label_3 
 _geom_angle 
 _geom_angle_site_symmetry_1 
 _geom_angle_site_symmetry_3 
 _geom_angle_publ_flag 
N9 Ag1 N1 154.60(5) . . ? 
N9 Ag1 Ag3 78.07(4) . . ? 
N1 Ag1 Ag3 127.26(4) . . ? 
N9 Ag1 Ag2 128.83(4) . . ? 
N1 Ag1 Ag2 72.45(4) . . ? 
Ag3 Ag1 Ag2 59.615(4) . . ? 
N4 Ag2 N3 153.69(5) . . ? 
N4 Ag2 Ag3 77.35(4) . . ? 
N3 Ag2 Ag3 128.61(4) . . ? 
N4 Ag2 Ag1 130.27(4) . . ? 
N3 Ag2 Ag1 72.18(4) . . ? 
Ag3 Ag2 Ag1 58.772(4) . . ? 
N6 Ag3 N7 157.37(5) . . ? 
N6 Ag3 Ag1 121.37(4) . . ? 
N7 Ag3 Ag1 79.90(4) . . ? 
N6 Ag3 Ag2 78.66(4) . . ? 
N7 Ag3 Ag2 121.64(4) . . ? 
Ag1 Ag3 Ag2 61.613(4) . . ? 
N2 N1 C1 113.87(13) . . ? 
N2 N1 Ag1 121.37(10) . . ? 
C1 N1 Ag1 119.22(10) . . ? 
N1 N2 N3 114.39(13) . . ? 
N2 N3 C13 112.54(13) . . ? 
N2 N3 Ag2 121.81(10) . . ? 
C13 N3 Ag2 120.60(10) . . ? 
N5 N4 C25 111.22(13) . . ? 
N5 N4 Ag2 128.98(11) . . ? 
C25 N4 Ag2 118.02(11) . . ? 
N4 N5 N6 116.99(13) . . ? 
N5 N6 C37 111.78(13) . . ? 
N5 N6 Ag3 127.94(11) . . ? 
C37 N6 Ag3 116.32(10) . . ? 
N8 N7 C49 113.38(13) . . ? 
N8 N7 Ag3 129.04(11) . . ? 
C49 N7 Ag3 115.21(10) . . ? 
N9 N8 N7 116.05(13) . . ? 
N8 N9 C61 111.63(12) . . ? 
N8 N9 Ag1 130.94(10) . . ? 
C61 N9 Ag1 117.25(10) . . ? 
C6 C1 C2 121.92(16) . . ? 
C6 C1 N1 118.21(15) . . ? 
C2 C1 N1 119.73(14) . . ? 
C3 C2 C1 117.87(16) . . ? 
C3 C2 C7 120.78(16) . . ? 
C1 C2 C7 121.30(15) . . ? 
C4 C3 C2 121.24(18) . . ? 
C4 C3 H3 119.4 . . ? 
C2 C3 H3 119.4 . . ? 
C3 C4 C5 119.83(18) . . ? 
C3 C4 H4 120.1 . . ? 
C5 C4 H4 120.1 . . ? 
C4 C5 C6 121.33(18) . . ? 
C4 C5 H5 119.3 . . ? 
C6 C5 H5 119.3 . . ? 
C5 C6 C1 117.79(17) . . ? 
C5 C6 C10 120.62(17) . . ? 
C1 C6 C10 121.58(16) . . ? 
C2 C7 C9 110.49(16) . . ? 
C2 C7 C8 113.65(15) . . ? 
C9 C7 C8 110.24(16) . . ? 
C2 C7 H7 107.4 . . ? 
C9 C7 H7 107.4 . . ? 
C8 C7 H7 107.4 . . ? 
C7 C8 H8A 109.5 . . ? 
C7 C8 H8B 109.5 . . ? 
H8A C8 H8B 109.5 . . ? 
C7 C8 H8C 109.5 . . ? 
H8A C8 H8C 109.5 . . ? 
H8B C8 H8C 109.5 . . ? 
C7 C9 H9A 109.5 . . ? 
C7 C9 H9B 109.5 . . ? 
H9A C9 H9B 109.5 . . ? 
C7 C9 H9C 109.5 . . ? 
H9A C9 H9C 109.5 . . ? 
H9B C9 H9C 109.5 . . ? 
C11 C10 C6 110.7(2) . . ? 
C11 C10 C12 112.1(3) . . ? 
C6 C10 C12 112.23(18) . . ? 
C11 C10 H10 107.1 . . ? 
C6 C10 H10 107.1 . . ? 
C12 C10 H10 107.1 . . ? 
C10 C11 H11A 109.5 . . ? 
C10 C11 H11B 109.5 . . ? 
H11A C11 H11B 109.5 . . ? 
C10 C11 H11C 109.5 . . ? 
H11A C11 H11C 109.5 . . ? 
H11B C11 H11C 109.5 . . ? 
C10 C12 H12A 109.5 . . ? 
C10 C12 H12B 109.5 . . ? 
H12A C12 H12B 109.5 . . ? 
C10 C12 H12C 109.5 . . ? 
H12A C12 H12C 109.5 . . ? 
H12B C12 H12C 109.5 . . ? 
C18 C13 C14 121.72(16) . . ? 
C18 C13 N3 120.03(15) . . ? 
C14 C13 N3 118.18(14) . . ? 
C15 C14 C13 118.02(16) . . ? 
C15 C14 C19 121.45(16) . . ? 
C13 C14 C19 120.50(15) . . ? 
C16 C15 C14 121.14(18) . . ? 
C16 C15 H15 119.4 . . ? 
C14 C15 H15 119.4 . . ? 
C17 C16 C15 120.17(18) . . ? 
C17 C16 H16 119.9 . . ? 
C15 C16 H16 119.9 . . ? 
C16 C17 C18 121.08(18) . . ? 
C16 C17 H17 119.5 . . ? 
C18 C17 H17 119.5 . . ? 
C13 C18 C17 117.82(17) . . ? 
C13 C18 C22 121.76(16) . . ? 
C17 C18 C22 120.41(16) . . ? 
C14 C19 C20 110.66(16) . . ? 
C14 C19 C21 112.71(16) . . ? 
C20 C19 C21 110.03(17) . . ? 
C14 C19 H19 107.8 . . ? 
C20 C19 H19 107.8 . . ? 
C21 C19 H19 107.8 . . ? 
C19 C20 H20A 109.5 . . ? 
C19 C20 H20B 109.5 . . ? 
H20A C20 H20B 109.5 . . ? 
C19 C20 H20C 109.5 . . ? 
H20A C20 H20C 109.5 . . ? 
H20B C20 H20C 109.5 . . ? 
C19 C21 H21A 109.5 . . ? 
C19 C21 H21B 109.5 . . ? 
H21A C21 H21B 109.5 . . ? 
C19 C21 H21C 109.5 . . ? 
H21A C21 H21C 109.5 . . ? 
H21B C21 H21C 109.5 . . ? 
C18 C22 C23 110.79(17) . . ? 
C18 C22 C24 111.79(18) . . ? 
C23 C22 C24 111.31(17) . . ? 
C18 C22 H22 107.6 . . ? 
C23 C22 H22 107.6 . . ? 
C24 C22 H22 107.6 . . ? 
C22 C23 H23A 109.5 . . ? 
C22 C23 H23B 109.5 . . ? 
H23A C23 H23B 109.5 . . ? 
C22 C23 H23C 109.5 . . ? 
H23A C23 H23C 109.5 . . ? 
H23B C23 H23C 109.5 . . ? 
C22 C24 H24A 109.5 . . ? 
C22 C24 H24B 109.5 . . ? 
H24A C24 H24B 109.5 . . ? 
C22 C24 H24C 109.5 . . ? 
H24A C24 H24C 109.5 . . ? 
H24B C24 H24C 109.5 . . ? 
C26 C25 C30 122.58(17) . . ? 
C26 C25 N4 117.89(17) . . ? 
C30 C25 N4 119.53(18) . . ? 
C25 C26 C27 117.5(2) . . ? 
C25 C26 C31 121.47(17) . . ? 
C27 C26 C31 121.0(2) . . ? 
C28 C27 C26 120.6(2) . . ? 
C28 C27 H27 119.7 . . ? 
C26 C27 H27 119.7 . . ? 
C29 C28 C27 120.7(2) . . ? 
C29 C28 H28 119.6 . . ? 
C27 C28 H28 119.6 . . ? 
C28 C29 C30 121.4(2) . . ? 
C28 C29 H29 119.3 . . ? 
C30 C29 H29 119.3 . . ? 
C29 C30 C25 117.1(2) . . ? 
C29 C30 C34 120.7(2) . . ? 
C25 C30 C34 122.25(17) . . ? 
C26 C31 C33 112.9(2) . . ? 
C26 C31 C32 110.4(2) . . ? 
C33 C31 C32 111.3(2) . . ? 
C26 C31 H31 107.3 . . ? 
C33 C31 H31 107.3 . . ? 
C32 C31 H31 107.3 . . ? 
C31 C32 H32A 109.5 . . ? 
C31 C32 H32B 109.5 . . ? 
H32A C32 H32B 109.5 . . ? 
C31 C32 H32C 109.5 . . ? 
H32A C32 H32C 109.5 . . ? 
H32B C32 H32C 109.5 . . ? 
C31 C33 H33A 109.5 . . ? 
C31 C33 H33B 109.5 . . ? 
H33A C33 H33B 109.5 . . ? 
C31 C33 H33C 109.5 . . ? 
H33A C33 H33C 109.5 . . ? 
H33B C33 H33C 109.5 . . ? 
C30 C34 C36 112.4(2) . . ? 
C30 C34 C35 111.5(2) . . ? 
C36 C34 C35 109.9(2) . . ? 
C30 C34 H34 107.6 . . ? 
C36 C34 H34 107.6 . . ? 
C35 C34 H34 107.6 . . ? 
C34 C35 H35A 109.5 . . ? 
C34 C35 H35B 109.5 . . ? 
H35A C35 H35B 109.5 . . ? 
C34 C35 H35C 109.5 . . ? 
H35A C35 H35C 109.5 . . ? 
H35B C35 H35C 109.5 . . ? 
C34 C36 H36A 109.5 . . ? 
C34 C36 H36B 109.5 . . ? 
H36A C36 H36B 109.5 . . ? 
C34 C36 H36C 109.5 . . ? 
H36A C36 H36C 109.5 . . ? 
H36B C36 H36C 109.5 . . ? 
C38 C37 C42 122.21(16) . . ? 
C38 C37 N6 119.45(16) . . ? 
C42 C37 N6 118.31(16) . . ? 
C39 C38 C37 117.25(19) . . ? 
C39 C38 C43 120.27(19) . . ? 
C37 C38 C43 122.47(17) . . ? 
C40 C39 C38 121.6(2) . . ? 
C40 C39 H39 119.2 . . ? 
C38 C39 H39 119.2 . . ? 
C39 C40 C41 120.2(2) . . ? 
C39 C40 H40 119.9 . . ? 
C41 C40 H40 119.9 . . ? 
C40 C41 C42 121.2(2) . . ? 
C40 C41 H41 119.4 . . ? 
C42 C41 H41 119.4 . . ? 
C41 C42 C37 117.39(19) . . ? 
C41 C42 C46 121.55(18) . . ? 
C37 C42 C46 121.04(16) . . ? 
C38 C43 C45 111.1(2) . . ? 
C38 C43 C44 112.8(2) . . ? 
C45 C43 C44 111.3(2) . . ? 
C38 C43 H43 107.1 . . ? 
C45 C43 H43 107.1 . . ? 
C44 C43 H43 107.1 . . ? 
C43 C44 H44A 109.5 . . ? 
C43 C44 H44B 109.5 . . ? 
H44A C44 H44B 109.5 . . ? 
C43 C44 H44C 109.5 . . ? 
H44A C44 H44C 109.5 . . ? 
H44B C44 H44C 109.5 . . ? 
C43 C45 H45A 109.5 . . ? 
C43 C45 H45B 109.5 . . ? 
H45A C45 H45B 109.5 . . ? 
C43 C45 H45C 109.5 . . ? 
H45A C45 H45C 109.5 . . ? 
H45B C45 H45C 109.5 . . ? 
C42 C46 C47 110.17(19) . . ? 
C42 C46 C48 113.3(2) . . ? 
C47 C46 C48 110.1(2) . . ? 
C42 C46 H46 107.7 . . ? 
C47 C46 H46 107.7 . . ? 
C48 C46 H46 107.7 . . ? 
C46 C47 H47A 109.5 . . ? 
C46 C47 H47B 109.5 . . ? 
H47A C47 H47B 109.5 . . ? 
C46 C47 H47C 109.5 . . ? 
H47A C47 H47C 109.5 . . ? 
H47B C47 H47C 109.5 . . ? 
C46 C48 H48A 109.5 . . ? 
C46 C48 H48B 109.5 . . ? 
H48A C48 H48B 109.5 . . ? 
C46 C48 H48C 109.5 . . ? 
H48A C48 H48C 109.5 . . ? 
H48B C48 H48C 109.5 . . ? 
C50 C49 C54 122.32(16) . . ? 
C50 C49 N7 117.26(15) . . ? 
C54 C49 N7 120.32(16) . . ? 
C51 C50 C49 118.03(19) . . ? 
C51 C50 C55 120.60(18) . . ? 
C49 C50 C55 121.32(16) . . ? 
C52 C51 C50 120.7(2) . . ? 
C52 C51 H51 119.7 . . ? 
C50 C51 H51 119.7 . . ? 
C51 C52 C53 120.6(2) . . ? 
C51 C52 H52 119.7 . . ? 
C53 C52 H52 119.7 . . ? 
C52 C53 C54 121.6(2) . . ? 
C52 C53 H53 119.2 . . ? 
C54 C53 H53 119.2 . . ? 
C53 C54 C49 116.7(2) . . ? 
C53 C54 C58 121.4(2) . . ? 
C49 C54 C58 121.76(17) . . ? 
C50 C55 C56 110.42(18) . . ? 
C50 C55 C57 113.00(18) . . ? 
C56 C55 C57 110.49(19) . . ? 
C50 C55 H55 107.6 . . ? 
C56 C55 H55 107.6 . . ? 
C57 C55 H55 107.6 . . ? 
C55 C56 H56A 109.5 . . ? 
C55 C56 H56B 109.5 . . ? 
H56A C56 H56B 109.5 . . ? 
C55 C56 H56C 109.5 . . ? 
H56A C56 H56C 109.5 . . ? 
H56B C56 H56C 109.5 . . ? 
C55 C57 H57A 109.5 . . ? 
C55 C57 H57B 109.5 . . ? 
H57A C57 H57B 109.5 . . ? 
C55 C57 H57C 109.5 . . ? 
H57A C57 H57C 109.5 . . ? 
H57B C57 H57C 109.5 . . ? 
C54 C58 C59 109.8(2) . . ? 
C54 C58 C60 114.6(2) . . ? 
C59 C58 C60 109.9(2) . . ? 
C54 C58 H58 107.4 . . ? 
C59 C58 H58 107.4 . . ? 
C60 C58 H58 107.4 . . ? 
C58 C59 H59A 109.5 . . ? 
C58 C59 H59B 109.5 . . ? 
H59A C59 H59B 109.5 . . ? 
C58 C59 H59C 109.5 . . ? 
H59A C59 H59C 109.5 . . ? 
H59B C59 H59C 109.5 . . ? 
C58 C60 H60A 109.5 . . ? 
C58 C60 H60B 109.5 . . ? 
H60A C60 H60B 109.5 . . ? 
C58 C60 H60C 109.5 . . ? 
H60A C60 H60C 109.5 . . ? 
H60B C60 H60C 109.5 . . ? 
C62 C61 C66 122.16(15) . . ? 
C62 C61 N9 120.73(15) . . ? 
C66 C61 N9 117.10(15) . . ? 
C63 C62 C61 117.64(16) . . ? 
C63 C62 C67 120.21(16) . . ? 
C61 C62 C67 122.14(15) . . ? 
C64 C63 C62 121.14(17) . . ? 
C64 C63 H63 119.4 . . ? 
C62 C63 H63 119.4 . . ? 
C65 C64 C63 120.30(17) . . ? 
C65 C64 H64 119.9 . . ? 
C63 C64 H64 119.9 . . ? 
C64 C65 C66 121.07(18) . . ? 
C64 C65 H65 119.5 . . ? 
C66 C65 H65 119.5 . . ? 
C65 C66 C61 117.64(17) . . ? 
C65 C66 C70 120.67(16) . . ? 
C61 C66 C70 121.69(15) . . ? 
C62 C67 C69 111.04(16) . . ? 
C62 C67 C68 111.82(17) . . ? 
C69 C67 C68 110.62(18) . . ? 
C62 C67 H67 107.7 . . ? 
C69 C67 H67 107.7 . . ? 
C68 C67 H67 107.7 . . ? 
C67 C68 H68A 109.5 . . ? 
C67 C68 H68B 109.5 . . ? 
H68A C68 H68B 109.5 . . ? 
C67 C68 H68C 109.5 . . ? 
H68A C68 H68C 109.5 . . ? 
H68B C68 H68C 109.5 . . ? 
C67 C69 H69A 109.5 . . ? 
C67 C69 H69B 109.5 . . ? 
H69A C69 H69B 109.5 . . ? 
C67 C69 H69C 109.5 . . ? 
H69A C69 H69C 109.5 . . ? 
H69B C69 H69C 109.5 . . ? 
C71 C70 C66 111.42(18) . . ? 
C71 C70 C72 111.3(2) . . ? 
C66 C70 C72 111.62(18) . . ? 
C71 C70 H70 107.4 . . ? 
C66 C70 H70 107.4 . . ? 
C72 C70 H70 107.4 . . ? 
C70 C71 H71A 109.5 . . ? 
C70 C71 H71B 109.5 . . ? 
H71A C71 H71B 109.5 . . ? 
C70 C71 H71C 109.5 . . ? 
H71A C71 H71C 109.5 . . ? 
H71B C71 H71C 109.5 . . ? 
C70 C72 H72A 109.5 . . ? 
C70 C72 H72B 109.5 . . ? 
H72A C72 H72B 109.5 . . ? 
C70 C72 H72C 109.5 . . ? 
H72A C72 H72C 109.5 . . ? 
H72B C72 H72C 109.5 . . ? 
C2S C1S C6S 117.9(4) . . ? 
C2S C1S C7S 121.1(4) . . ? 
C6S C1S C7S 121.1(4) . . ? 
C3S C2S C1S 121.0(4) . . ? 
C3S C2S H2S 119.5 . . ? 
C1S C2S H2S 119.5 . . ? 
C2S C3S C4S 121.0(4) . . ? 
C2S C3S H3S 119.5 . . ? 
C4S C3S H3S 119.5 . . ? 
C3S C4S C5S 119.7(4) . . ? 
C3S C4S H4S 120.2 . . ? 
C5S C4S H4S 120.2 . . ? 
C6S C5S C4S 120.2(4) . . ? 
C6S C5S H5S 119.9 . . ? 
C4S C5S H5S 119.9 . . ? 
C5S C6S C1S 120.2(4) . . ? 
C5S C6S H6S 119.9 . . ? 
C1S C6S H6S 119.9 . . ? 
C1S C7S H7S1 109.5 . . ? 
C1S C7S H7S2 109.5 . . ? 
H7S1 C7S H7S2 109.5 . . ? 
C1S C7S H7S3 109.5 . . ? 
H7S1 C7S H7S3 109.5 . . ? 
H7S2 C7S H7S3 109.5 . . ? 
 
loop_ 
 _geom_torsion_atom_site_label_1 
 _geom_torsion_atom_site_label_2 
 _geom_torsion_atom_site_label_3 
 _geom_torsion_atom_site_label_4 
 _geom_torsion 
 _geom_torsion_site_symmetry_1 
 _geom_torsion_site_symmetry_2 
 _geom_torsion_site_symmetry_3 
 _geom_torsion_site_symmetry_4 
 _geom_torsion_publ_flag 
N9 Ag1 Ag2 N4 -70.63(7) . . . . ? 
N1 Ag1 Ag2 N4 125.28(7) . . . . ? 
Ag3 Ag1 Ag2 N4 -31.86(5) . . . . ? 
N9 Ag1 Ag2 N3 125.27(6) . . . . ? 
N1 Ag1 Ag2 N3 -38.82(6) . . . . ? 
Ag3 Ag1 Ag2 N3 164.04(4) . . . . ? 
N9 Ag1 Ag2 Ag3 -38.77(5) . . . . ? 
N1 Ag1 Ag2 Ag3 157.14(4) . . . . ? 
N9 Ag1 Ag3 N6 -156.15(6) . . . . ? 
N1 Ag1 Ag3 N6 26.02(7) . . . . ? 
Ag2 Ag1 Ag3 N6 53.75(5) . . . . ? 
N9 Ag1 Ag3 N7 15.52(6) . . . . ? 
N1 Ag1 Ag3 N7 -162.31(6) . . . . ? 
Ag2 Ag1 Ag3 N7 -134.58(4) . . . . ? 
N9 Ag1 Ag3 Ag2 150.09(4) . . . . ? 
N1 Ag1 Ag3 Ag2 -27.74(5) . . . . ? 
N4 Ag2 Ag3 N6 20.23(6) . . . . ? 
N3 Ag2 Ag3 N6 -154.96(6) . . . . ? 
Ag1 Ag2 Ag3 N6 -135.39(4) . . . . ? 
N4 Ag2 Ag3 N7 -148.93(6) . . . . ? 
N3 Ag2 Ag3 N7 35.88(7) . . . . ? 
Ag1 Ag2 Ag3 N7 55.45(4) . . . . ? 
N4 Ag2 Ag3 Ag1 155.62(4) . . . . ? 
N3 Ag2 Ag3 Ag1 -19.57(5) . . . . ? 
N9 Ag1 N1 N2 -98.49(16) . . . . ? 
Ag3 Ag1 N1 N2 76.56(12) . . . . ? 
Ag2 Ag1 N1 N2 51.66(11) . . . . ? 
N9 Ag1 N1 C1 53.63(19) . . . . ? 
Ag3 Ag1 N1 C1 -131.33(10) . . . . ? 
Ag2 Ag1 N1 C1 -156.23(12) . . . . ? 
C1 N1 N2 N3 175.72(13) . . . . ? 
Ag1 N1 N2 N3 -30.80(17) . . . . ? 
N1 N2 N3 C13 174.18(13) . . . . ? 
N1 N2 N3 Ag2 -30.86(17) . . . . ? 
N4 Ag2 N3 N2 -100.04(16) . . . . ? 
Ag3 Ag2 N3 N2 69.32(12) . . . . ? 
Ag1 Ag2 N3 N2 51.81(11) . . . . ? 
N4 Ag2 N3 C13 52.95(19) . . . . ? 
Ag3 Ag2 N3 C13 -137.69(10) . . . . ? 
Ag1 Ag2 N3 C13 -155.20(12) . . . . ? 
N3 Ag2 N4 N5 145.02(13) . . . . ? 
Ag3 Ag2 N4 N5 -26.47(14) . . . . ? 
Ag1 Ag2 N4 N5 1.09(17) . . . . ? 
N3 Ag2 N4 C25 -18.3(2) . . . . ? 
Ag3 Ag2 N4 C25 170.17(14) . . . . ? 
Ag1 Ag2 N4 C25 -162.27(11) . . . . ? 
C25 N4 N5 N6 178.50(15) . . . . ? 
Ag2 N4 N5 N6 14.2(2) . . . . ? 
N4 N5 N6 C37 176.49(15) . . . . ? 
N4 N5 N6 Ag3 20.0(2) . . . . ? 
N7 Ag3 N6 N5 125.83(16) . . . . ? 
Ag1 Ag3 N6 N5 -75.92(15) . . . . ? 
Ag2 Ag3 N6 N5 -29.57(13) . . . . ? 
N7 Ag3 N6 C37 -29.8(2) . . . . ? 
Ag1 Ag3 N6 C37 128.49(11) . . . . ? 
Ag2 Ag3 N6 C37 174.84(12) . . . . ? 
N6 Ag3 N7 N8 137.68(15) . . . . ? 
Ag1 Ag3 N7 N8 -23.57(13) . . . . ? 
Ag2 Ag3 N7 N8 -70.96(15) . . . . ? 
N6 Ag3 N7 C49 -23.5(2) . . . . ? 
Ag1 Ag3 N7 C49 175.25(12) . . . . ? 
Ag2 Ag3 N7 C49 127.86(11) . . . . ? 
C49 N7 N8 N9 178.02(14) . . . . ? 
Ag3 N7 N8 N9 16.6(2) . . . . ? 
N7 N8 N9 C61 -174.99(14) . . . . ? 
N7 N8 N9 Ag1 10.1(2) . . . . ? 
N1 Ag1 N9 N8 155.81(13) . . . . ? 
Ag3 Ag1 N9 N8 -20.16(13) . . . . ? 
Ag2 Ag1 N9 N8 13.35(17) . . . . ? 
N1 Ag1 N9 C61 -18.9(2) . . . . ? 
Ag3 Ag1 N9 C61 165.13(12) . . . . ? 
Ag2 Ag1 N9 C61 -161.35(9) . . . . ? 
N2 N1 C1 C6 -96.16(19) . . . . ? 
Ag1 N1 C1 C6 109.73(16) . . . . ? 
N2 N1 C1 C2 87.99(18) . . . . ? 
Ag1 N1 C1 C2 -66.12(18) . . . . ? 
C6 C1 C2 C3 -1.4(3) . . . . ? 
N1 C1 C2 C3 174.32(16) . . . . ? 
C6 C1 C2 C7 176.04(17) . . . . ? 
N1 C1 C2 C7 -8.3(2) . . . . ? 
C1 C2 C3 C4 0.0(3) . . . . ? 
C7 C2 C3 C4 -177.40(19) . . . . ? 
C2 C3 C4 C5 0.8(3) . . . . ? 
C3 C4 C5 C6 -0.4(4) . . . . ? 
C4 C5 C6 C1 -0.9(3) . . . . ? 
C4 C5 C6 C10 180.0(2) . . . . ? 
C2 C1 C6 C5 1.8(3) . . . . ? 
N1 C1 C6 C5 -173.95(18) . . . . ? 
C2 C1 C6 C10 -179.11(18) . . . . ? 
N1 C1 C6 C10 5.1(3) . . . . ? 
C3 C2 C7 C9 92.0(2) . . . . ? 
C1 C2 C7 C9 -85.3(2) . . . . ? 
C3 C2 C7 C8 -32.5(2) . . . . ? 
C1 C2 C7 C8 150.15(17) . . . . ? 
C5 C6 C10 C11 80.5(3) . . . . ? 
C1 C6 C10 C11 -98.6(3) . . . . ? 
C5 C6 C10 C12 -45.7(3) . . . . ? 
C1 C6 C10 C12 135.3(2) . . . . ? 
N2 N3 C13 C18 85.57(18) . . . . ? 
Ag2 N3 C13 C18 -69.73(18) . . . . ? 
N2 N3 C13 C14 -97.33(17) . . . . ? 
Ag2 N3 C13 C14 107.37(15) . . . . ? 
C18 C13 C14 C15 -2.3(3) . . . . ? 
N3 C13 C14 C15 -179.34(16) . . . . ? 
C18 C13 C14 C19 175.78(17) . . . . ? 
N3 C13 C14 C19 -1.3(2) . . . . ? 
C13 C14 C15 C16 0.6(3) . . . . ? 
C19 C14 C15 C16 -177.46(19) . . . . ? 
C14 C15 C16 C17 0.9(3) . . . . ? 
C15 C16 C17 C18 -0.7(3) . . . . ? 
C14 C13 C18 C17 2.4(3) . . . . ? 
N3 C13 C18 C17 179.44(16) . . . . ? 
C14 C13 C18 C22 -178.48(17) . . . . ? 
N3 C13 C18 C22 -1.5(3) . . . . ? 
C16 C17 C18 C13 -0.9(3) . . . . ? 
C16 C17 C18 C22 180.0(2) . . . . ? 
C15 C14 C19 C20 100.0(2) . . . . ? 
C13 C14 C19 C20 -78.0(2) . . . . ? 
C15 C14 C19 C21 -23.7(3) . . . . ? 
C13 C14 C19 C21 158.27(18) . . . . ? 
C13 C18 C22 C23 -94.5(2) . . . . ? 
C17 C18 C22 C23 84.5(2) . . . . ? 
C13 C18 C22 C24 140.67(18) . . . . ? 
C17 C18 C22 C24 -40.3(3) . . . . ? 
N5 N4 C25 C26 112.39(18) . . . . ? 
Ag2 N4 C25 C26 -81.42(18) . . . . ? 
N5 N4 C25 C30 -67.5(2) . . . . ? 
Ag2 N4 C25 C30 98.68(17) . . . . ? 
C30 C25 C26 C27 2.4(3) . . . . ? 
N4 C25 C26 C27 -177.50(17) . . . . ? 
C30 C25 C26 C31 -176.84(18) . . . . ? 
N4 C25 C26 C31 3.3(3) . . . . ? 
C25 C26 C27 C28 0.4(3) . . . . ? 
C31 C26 C27 C28 179.7(2) . . . . ? 
C26 C27 C28 C29 -2.4(4) . . . . ? 
C27 C28 C29 C30 1.5(4) . . . . ? 
C28 C29 C30 C25 1.2(3) . . . . ? 
C28 C29 C30 C34 -179.0(2) . . . . ? 
C26 C25 C30 C29 -3.2(3) . . . . ? 
N4 C25 C30 C29 176.70(17) . . . . ? 
C26 C25 C30 C34 176.97(18) . . . . ? 
N4 C25 C30 C34 -3.1(3) . . . . ? 
C25 C26 C31 C33 -137.3(2) . . . . ? 
C27 C26 C31 C33 43.5(3) . . . . ? 
C25 C26 C31 C32 97.4(2) . . . . ? 
C27 C26 C31 C32 -81.8(3) . . . . ? 
C29 C30 C34 C36 44.5(3) . . . . ? 
C25 C30 C34 C36 -135.6(2) . . . . ? 
C29 C30 C34 C35 -79.5(2) . . . . ? 
C25 C30 C34 C35 100.4(2) . . . . ? 
N5 N6 C37 C38 -76.0(2) . . . . ? 
Ag3 N6 C37 C38 83.42(18) . . . . ? 
N5 N6 C37 C42 106.09(18) . . . . ? 
Ag3 N6 C37 C42 -94.46(16) . . . . ? 
C42 C37 C38 C39 -3.2(3) . . . . ? 
N6 C37 C38 C39 179.01(18) . . . . ? 
C42 C37 C38 C43 176.95(18) . . . . ? 
N6 C37 C38 C43 -0.8(3) . . . . ? 
C37 C38 C39 C40 0.8(4) . . . . ? 
C43 C38 C39 C40 -179.3(2) . . . . ? 
C38 C39 C40 C41 1.5(4) . . . . ? 
C39 C40 C41 C42 -1.5(4) . . . . ? 
C40 C41 C42 C37 -0.8(3) . . . . ? 
C40 C41 C42 C46 177.6(2) . . . . ? 
C38 C37 C42 C41 3.2(3) . . . . ? 
N6 C37 C42 C41 -179.00(17) . . . . ? 
C38 C37 C42 C46 -175.18(18) . . . . ? 
N6 C37 C42 C46 2.6(3) . . . . ? 
C39 C38 C43 C45 -78.9(3) . . . . ? 
C37 C38 C43 C45 100.9(2) . . . . ? 
C39 C38 C43 C44 46.9(3) . . . . ? 
C37 C38 C43 C44 -133.3(2) . . . . ? 
C41 C42 C46 C47 -88.1(2) . . . . ? 
C37 C42 C46 C47 90.2(2) . . . . ? 
C41 C42 C46 C48 35.8(3) . . . . ? 
C37 C42 C46 C48 -145.9(2) . . . . ? 
N8 N7 C49 C50 117.04(16) . . . . ? 
Ag3 N7 C49 C50 -78.80(16) . . . . ? 
N8 N7 C49 C54 -66.4(2) . . . . ? 
Ag3 N7 C49 C54 97.72(16) . . . . ? 
C54 C49 C50 C51 2.2(3) . . . . ? 
N7 C49 C50 C51 178.63(15) . . . . ? 
C54 C49 C50 C55 179.65(17) . . . . ? 
N7 C49 C50 C55 -3.9(2) . . . . ? 
C49 C50 C51 C52 0.1(3) . . . . ? 
C55 C50 C51 C52 -177.35(19) . . . . ? 
C50 C51 C52 C53 -1.7(3) . . . . ? 
C51 C52 C53 C54 1.0(4) . . . . ? 
C52 C53 C54 C49 1.3(3) . . . . ? 
C52 C53 C54 C58 -174.5(2) . . . . ? 
C50 C49 C54 C53 -2.8(3) . . . . ? 
N7 C49 C54 C53 -179.18(17) . . . . ? 
C50 C49 C54 C58 172.86(19) . . . . ? 
N7 C49 C54 C58 -3.5(3) . . . . ? 
C51 C50 C55 C56 73.7(2) . . . . ? 
C49 C50 C55 C56 -103.7(2) . . . . ? 
C51 C50 C55 C57 -50.6(2) . . . . ? 
C49 C50 C55 C57 132.00(19) . . . . ? 
C53 C54 C58 C59 90.7(3) . . . . ? 
C49 C54 C58 C59 -84.8(3) . . . . ? 
C53 C54 C58 C60 -33.4(3) . . . . ? 
C49 C54 C58 C60 151.1(2) . . . . ? 
N8 N9 C61 C62 -73.51(19) . . . . ? 
Ag1 N9 C61 C62 102.19(15) . . . . ? 
N8 N9 C61 C66 107.68(16) . . . . ? 
Ag1 N9 C61 C66 -76.62(16) . . . . ? 
C66 C61 C62 C63 -2.3(2) . . . . ? 
N9 C61 C62 C63 178.94(15) . . . . ? 
C66 C61 C62 C67 178.86(16) . . . . ? 
N9 C61 C62 C67 0.1(2) . . . . ? 
C61 C62 C63 C64 1.4(3) . . . . ? 
C67 C62 C63 C64 -179.72(17) . . . . ? 
C62 C63 C64 C65 0.8(3) . . . . ? 
C63 C64 C65 C66 -2.2(3) . . . . ? 
C64 C65 C66 C61 1.3(3) . . . . ? 
C64 C65 C66 C70 -177.88(17) . . . . ? 
C62 C61 C66 C65 1.0(2) . . . . ? 
N9 C61 C66 C65 179.77(15) . . . . ? 
C62 C61 C66 C70 -179.86(16) . . . . ? 
N9 C61 C66 C70 -1.1(2) . . . . ? 
C63 C62 C67 C69 -77.0(2) . . . . ? 
C61 C62 C67 C69 101.8(2) . . . . ? 
C63 C62 C67 C68 47.1(2) . . . . ? 
C61 C62 C67 C68 -134.08(18) . . . . ? 
C65 C66 C70 C71 -66.2(3) . . . . ? 
C61 C66 C70 C71 114.7(2) . . . . ? 
C65 C66 C70 C72 59.0(2) . . . . ? 
C61 C66 C70 C72 -120.1(2) . . . . ? 
C6S C1S C2S C3S 0.3(4) . . . . ? 
C7S C1S C2S C3S -179.3(3) . . . . ? 
C1S C2S C3S C4S -1.1(5) . . . . ? 
C2S C3S C4S C5S 1.4(5) . . . . ? 
C3S C4S C5S C6S -0.9(5) . . . . ? 
C4S C5S C6S C1S 0.1(5) . . . . ? 
C2S C1S C6S C5S 0.2(4) . . . . ? 
C7S C1S C6S C5S 179.8(3) . . . . ? 
 
_diffrn_measured_fraction_theta_max    0.977 
_diffrn_reflns_theta_full              30.50 
_diffrn_measured_fraction_theta_full   0.977 
_refine_diff_density_max    0.936 
_refine_diff_density_min   -0.666 
_refine_diff_density_rms    0.070 

#===END

data_AuL2:2Tol
 
_audit_creation_method            SHELXL-97 
_chemical_name_systematic 
; 
 ? 
; 
_chemical_name_common             ? 
_chemical_melting_point           ? 
_chemical_formula_moiety          ? 
_chemical_formula_sum 
 'C62 H84 Au2 N6' 
_chemical_formula_weight          1307.29 
 
loop_ 
 _atom_type_symbol 
 _atom_type_description 
 _atom_type_scat_dispersion_real 
 _atom_type_scat_dispersion_imag 
 _atom_type_scat_source 
 'C'  'C'   0.0033   0.0016 
 'International Tables Vol C Tables 4.2.6.8 and 6.1.1.4' 
 'H'  'H'   0.0000   0.0000 
 'International Tables Vol C Tables 4.2.6.8 and 6.1.1.4' 
 'Au'  'Au'  -2.0133   8.8022 
 'International Tables Vol C Tables 4.2.6.8 and 6.1.1.4' 
 'N'  'N'   0.0061   0.0033 
 'International Tables Vol C Tables 4.2.6.8 and 6.1.1.4' 
 
_symmetry_cell_setting            Monoclinic 
_symmetry_space_group_name_H-M    P21/c
 
loop_ 
 _symmetry_equiv_pos_as_xyz 
 'x, y, z' 
 '-x, y+1/2, -z+1/2' 
 '-x, -y, -z' 
 'x, -y-1/2, z-1/2' 
 
_cell_length_a                    12.9430(2) 
_cell_length_b                    10.0730(2) 
_cell_length_c                    22.5260(5) 
_cell_angle_alpha                 90.00 
_cell_angle_beta                  102.6100(10) 
_cell_angle_gamma                 90.00 
_cell_volume                      2865.98(10) 
_cell_formula_units_Z             2 
_cell_measurement_temperature     150(2) 
_cell_measurement_reflns_used     44149
_cell_measurement_theta_min       8.17 
_cell_measurement_theta_max       27.48 
 
_exptl_crystal_description        Block 
_exptl_crystal_colour             Yellow 
_exptl_crystal_size_max           0.20 
_exptl_crystal_size_mid           0.17 
_exptl_crystal_size_min           0.10 
_exptl_crystal_density_meas       ? 
_exptl_crystal_density_diffrn     1.515 
_exptl_crystal_density_method     'not measured' 
_exptl_crystal_F_000              1312 
_exptl_absorpt_coefficient_mu     5.156 
_exptl_absorpt_correction_type    Multi-scan			 
_exptl_absorpt_correction_T_min   0.4253 
_exptl_absorpt_correction_T_max   0.6266 
_exptl_absorpt_process_details    'SORTAV (Blessing, 1995)'
 
_exptl_special_details 
; 
 ? 
; 
 
_diffrn_ambient_temperature       150(2) 
_diffrn_radiation_wavelength      0.71073 
_diffrn_radiation_type            MoK\a 
_diffrn_radiation_source          'fine-focus sealed tube' 
_diffrn_radiation_monochromator   graphite 
_diffrn_measurement_device_type   'Bruker Kappa CCD Diffractometer'
_diffrn_measurement_method        'omega and phi scans'
_diffrn_detector_area_resol_mean  ?
_diffrn_standards_number          0
_diffrn_standards_interval_count  0
_diffrn_standards_interval_time   0
_diffrn_standards_decay_%         0
_diffrn_reflns_number             44149 
_diffrn_reflns_av_R_equivalents   0.1134 
_diffrn_reflns_av_sigmaI/netI     0.0554 
_diffrn_reflns_limit_h_min        -16 
_diffrn_reflns_limit_h_max        16 
_diffrn_reflns_limit_k_min        -13 
_diffrn_reflns_limit_k_max        13 
_diffrn_reflns_limit_l_min        -29 
_diffrn_reflns_limit_l_max        29 
_diffrn_reflns_theta_min          8.17 
_diffrn_reflns_theta_max          27.48 
_reflns_number_total              6356 
_reflns_number_gt                 5154 
_reflns_threshold_expression      >2sigma(I) 
 
_computing_data_collection        'Kappa CCD'
_computing_cell_refinement        
                    'HKL Scalepack (Otwinowski & Minor 1997)'
_computing_data_reduction         
              'Denzo and Scalepak (Otwinowski & Minor, 1997)'
_computing_structure_solution     'SHELXS-86 (Sheldrick, 1986)'
_computing_structure_refinement   'SHELXL-97 (Sheldrick, 1997)'
_computing_molecular_graphics     'ORTEP 3 for Windows (Farrugia, 1997)'
_computing_publication_material   'SHELXL-97 (Sheldrick, 1997)'
 
_refine_special_details 
; 
 Refinement of F^2^ against ALL reflections.  The weighted R-factor wR and 
 goodness of fit S are based on F^2^, conventional R-factors R are based 
 on F, with F set to zero for negative F^2^. The threshold expression of 
 F^2^ > 2sigma(F^2^) is used only for calculating R-factors(gt) etc. and is 
 not relevant to the choice of reflections for refinement.  R-factors based 
 on F^2^ are statistically about twice as large as those based on F, and R- 
 factors based on ALL data will be even larger. 
; 
 
_refine_ls_structure_factor_coef  Fsqd  
_refine_ls_matrix_type            full 
_refine_ls_weighting_scheme       calc  
_refine_ls_weighting_details 
 'calc w=1/[\s^2^(Fo^2^)+(0.0810P)^2^+3.2686P] where P=(Fo^2^+2Fc^2^)/3' 
_atom_sites_solution_primary      direct 
_atom_sites_solution_secondary    difmap 
_atom_sites_solution_hydrogens    geom 
_refine_ls_hydrogen_treatment     Constr 
_refine_ls_extinction_method      none 
_refine_ls_extinction_coef        ? 
_refine_ls_number_reflns          6356 
_refine_ls_number_parameters      325 
_refine_ls_number_restraints      0 
_refine_ls_R_factor_all           0.0668 
_refine_ls_R_factor_gt            0.0504 
_refine_ls_wR_factor_ref          0.1398 
_refine_ls_wR_factor_gt           0.1220 
_refine_ls_goodness_of_fit_ref    1.153 
_refine_ls_restrained_S_all       1.153 
_refine_ls_shift/su_max           0.002 
_refine_ls_shift/su_mean          0.000 
 
loop_ 
 _atom_site_label 
 _atom_site_type_symbol 
 _atom_site_fract_x 
 _atom_site_fract_y 
 _atom_site_fract_z 
 _atom_site_U_iso_or_equiv 
 _atom_site_adp_type 
 _atom_site_occupancy 
 _atom_site_symmetry_multiplicity 
 _atom_site_calc_flag 
 _atom_site_refinement_flags 
 _atom_site_disorder_assembly 
 _atom_site_disorder_group 
Au1 Au 0.097702(15) 0.54063(2) 0.526301(9) 0.02599(12) Uani 1 1 d . . . 
N1 N 0.1030(4) 0.5983(5) 0.4399(2) 0.0279(10) Uani 1 1 d . . . 
N2 N 0.0274(4) 0.5847(5) 0.3913(2) 0.0260(10) Uani 1 1 d . . . 
N3 N -0.0617(4) 0.5314(5) 0.3959(2) 0.0267(10) Uani 1 1 d . . . 
C1 C 0.1984(5) 0.6557(6) 0.4261(3) 0.0295(12) Uani 1 1 d . . . 
C2 C 0.2752(5) 0.5729(7) 0.4114(3) 0.0335(13) Uani 1 1 d . . . 
C3 C 0.3674(5) 0.6296(7) 0.4011(3) 0.0379(14) Uani 1 1 d . . . 
H3 H 0.4205 0.5747 0.3908 0.045 Uiso 1 1 calc R . . 
C4 C 0.3824(5) 0.7653(7) 0.4057(3) 0.0377(14) Uani 1 1 d . . . 
H4 H 0.4459 0.8033 0.3987 0.045 Uiso 1 1 calc R . . 
C5 C 0.3059(5) 0.8455(7) 0.4203(3) 0.0359(14) Uani 1 1 d . . . 
H5 H 0.3176 0.9386 0.4235 0.043 Uiso 1 1 calc R . . 
C6 C 0.2116(5) 0.7940(7) 0.4306(3) 0.0317(12) Uani 1 1 d . . . 
C7 C 0.1290(5) 0.8845(7) 0.4482(3) 0.0346(13) Uani 1 1 d . . . 
H7 H 0.0588 0.8390 0.4364 0.042 Uiso 1 1 calc R . . 
C8 C 0.1198(8) 1.0179(9) 0.4157(5) 0.057(2) Uani 1 1 d . . . 
H8A H 0.1874 1.0652 0.4269 0.086 Uiso 1 1 calc R . . 
H8B H 0.0641 1.0709 0.4276 0.086 Uiso 1 1 calc R . . 
H8C H 0.1020 1.0034 0.3716 0.086 Uiso 1 1 calc R . . 
C9 C 0.1534(7) 0.9045(10) 0.5179(4) 0.055(2) Uani 1 1 d . . . 
H9A H 0.1539 0.8182 0.5380 0.082 Uiso 1 1 calc R . . 
H9B H 0.0990 0.9613 0.5289 0.082 Uiso 1 1 calc R . . 
H9C H 0.2229 0.9468 0.5310 0.082 Uiso 1 1 calc R . . 
C10 C 0.2610(6) 0.4211(8) 0.4095(4) 0.0414(16) Uani 1 1 d . . . 
H10 H 0.1837 0.4014 0.4031 0.050 Uiso 1 1 calc R . . 
C11 C 0.3026(6) 0.3560(8) 0.3576(4) 0.0468(17) Uani 1 1 d . . . 
H11A H 0.3795 0.3678 0.3649 0.070 Uiso 1 1 calc R . . 
H11B H 0.2691 0.3977 0.3189 0.070 Uiso 1 1 calc R . . 
H11C H 0.2858 0.2611 0.3560 0.070 Uiso 1 1 calc R . . 
C12 C 0.3166(7) 0.3630(8) 0.4711(4) 0.0504(18) Uani 1 1 d . . . 
H12A H 0.3087 0.2663 0.4701 0.076 Uiso 1 1 calc R . . 
H12B H 0.2846 0.3997 0.5032 0.076 Uiso 1 1 calc R . . 
H12C H 0.3919 0.3860 0.4794 0.076 Uiso 1 1 calc R . . 
C13 C -0.1346(5) 0.5269(6) 0.3374(3) 0.0262(12) Uani 1 1 d . . . 
C14 C -0.1275(5) 0.4237(6) 0.2962(3) 0.0302(12) Uani 1 1 d . . . 
C15 C -0.1963(5) 0.4274(7) 0.2395(3) 0.0337(13) Uani 1 1 d . . . 
H15 H -0.1913 0.3612 0.2102 0.040 Uiso 1 1 calc R . . 
C16 C -0.2722(5) 0.5262(6) 0.2250(3) 0.0336(14) Uani 1 1 d . . . 
H16 H -0.3180 0.5273 0.1858 0.040 Uiso 1 1 calc R . . 
C17 C -0.2819(5) 0.6225(7) 0.2665(3) 0.0337(13) Uani 1 1 d . . . 
H17 H -0.3352 0.6884 0.2562 0.040 Uiso 1 1 calc R . . 
C18 C -0.2136(4) 0.6241(6) 0.3241(3) 0.0289(12) Uani 1 1 d . . . 
C19 C -0.0496(5) 0.3097(6) 0.3110(3) 0.0332(13) Uani 1 1 d . . . 
H19 H -0.0108 0.3198 0.3543 0.040 Uiso 1 1 calc R . . 
C20 C 0.0314(6) 0.3121(9) 0.2716(4) 0.055(2) Uani 1 1 d . . . 
H20A H -0.0043 0.2988 0.2289 0.083 Uiso 1 1 calc R . . 
H20B H 0.0831 0.2409 0.2843 0.083 Uiso 1 1 calc R . . 
H20C H 0.0678 0.3980 0.2760 0.083 Uiso 1 1 calc R . . 
C21 C -0.1086(7) 0.1772(8) 0.3053(5) 0.058(2) Uani 1 1 d . . . 
H21A H -0.1424 0.1612 0.2626 0.086 Uiso 1 1 calc R . . 
H21B H -0.1629 0.1800 0.3296 0.086 Uiso 1 1 calc R . . 
H21C H -0.0585 0.1055 0.3201 0.086 Uiso 1 1 calc R . . 
C22 C -0.2224(5) 0.7350(6) 0.3688(3) 0.0333(13) Uani 1 1 d . . . 
H22 H -0.1810 0.7087 0.4099 0.040 Uiso 1 1 calc R . . 
C23 C -0.1741(6) 0.8620(7) 0.3495(3) 0.0443(16) Uani 1 1 d . . . 
H23A H -0.0989 0.8474 0.3505 0.066 Uiso 1 1 calc R . . 
H23B H -0.1816 0.9340 0.3776 0.066 Uiso 1 1 calc R . . 
H23C H -0.2110 0.8862 0.3082 0.066 Uiso 1 1 calc R . . 
C24 C -0.3371(6) 0.7604(7) 0.3731(3) 0.0417(15) Uani 1 1 d . . . 
H24A H -0.3778 0.7919 0.3337 0.063 Uiso 1 1 calc R . . 
H24B H -0.3387 0.8278 0.4043 0.063 Uiso 1 1 calc R . . 
H24C H -0.3684 0.6778 0.3841 0.063 Uiso 1 1 calc R . . 
C1S C 0.4192(6) 0.8297(8) 0.6826(4) 0.0469(17) Uani 1 1 d . . . 
C2S C 0.3788(6) 0.7027(9) 0.6676(4) 0.055(2) Uani 1 1 d . . . 
H2S H 0.3538 0.6519 0.6972 0.066 Uiso 1 1 calc R . . 
C3S C 0.3744(6) 0.6494(8) 0.6101(5) 0.056(2) Uani 1 1 d . . . 
H3S H 0.3469 0.5626 0.6011 0.067 Uiso 1 1 calc R . . 
C4S C 0.4083(6) 0.7182(9) 0.5678(4) 0.0538(19) Uani 1 1 d . . . 
H4S H 0.4040 0.6815 0.5284 0.065 Uiso 1 1 calc R . . 
C5S C 0.4504(6) 0.8452(9) 0.5816(4) 0.055(2) Uani 1 1 d . . . 
H5S H 0.4757 0.8946 0.5518 0.066 Uiso 1 1 calc R . . 
C6S C 0.4554(5) 0.8987(7) 0.6381(4) 0.0466(17) Uani 1 1 d . . . 
H6S H 0.4842 0.9850 0.6469 0.056 Uiso 1 1 calc R . . 
C7S C 0.4203(8) 0.8915(14) 0.7436(5) 0.076(3) Uani 1 1 d . . . 
H7S1 H 0.4846 0.9448 0.7565 0.114 Uiso 1 1 calc R . . 
H7S2 H 0.4189 0.8214 0.7736 0.114 Uiso 1 1 calc R . . 
H7S3 H 0.3580 0.9485 0.7405 0.114 Uiso 1 1 calc R . . 
 
loop_ 
 _atom_site_aniso_label 
 _atom_site_aniso_U_11 
 _atom_site_aniso_U_22 
 _atom_site_aniso_U_33 
 _atom_site_aniso_U_23 
 _atom_site_aniso_U_13 
 _atom_site_aniso_U_12 
Au1 0.02633(16) 0.03454(17) 0.01729(16) 0.00080(8) 0.00517(9) -0.00268(8) 
N1 0.026(2) 0.037(3) 0.022(2) 0.002(2) 0.0081(18) -0.003(2) 
N2 0.028(2) 0.032(2) 0.018(2) 0.0004(19) 0.0061(18) 0.001(2) 
N3 0.027(2) 0.034(3) 0.020(2) 0.0017(19) 0.0067(19) -0.0014(19) 
C1 0.029(3) 0.040(3) 0.018(3) 0.003(2) 0.004(2) -0.003(2) 
C2 0.029(3) 0.042(3) 0.030(3) -0.001(3) 0.007(2) -0.002(3) 
C3 0.031(3) 0.050(4) 0.034(3) 0.000(3) 0.011(2) -0.001(3) 
C4 0.033(3) 0.051(4) 0.030(3) 0.007(3) 0.010(2) -0.003(3) 
C5 0.035(3) 0.045(4) 0.027(3) 0.003(3) 0.006(2) -0.007(3) 
C6 0.032(3) 0.040(3) 0.022(3) 0.004(2) 0.004(2) 0.000(3) 
C7 0.035(3) 0.037(3) 0.033(3) 0.001(3) 0.008(2) -0.003(3) 
C8 0.061(5) 0.049(4) 0.070(6) 0.007(4) 0.031(5) 0.009(4) 
C9 0.056(5) 0.077(6) 0.033(4) -0.011(4) 0.011(3) 0.014(4) 
C10 0.036(3) 0.043(4) 0.049(4) -0.008(3) 0.018(3) -0.003(3) 
C11 0.041(4) 0.057(4) 0.042(4) -0.014(3) 0.008(3) 0.000(3) 
C12 0.068(5) 0.039(4) 0.044(4) 0.000(3) 0.013(4) -0.002(4) 
C13 0.031(3) 0.032(3) 0.017(3) 0.003(2) 0.008(2) -0.004(2) 
C14 0.031(3) 0.036(3) 0.023(3) 0.003(2) 0.008(2) -0.003(2) 
C15 0.042(3) 0.034(3) 0.024(3) -0.004(2) 0.005(3) -0.003(3) 
C16 0.035(3) 0.042(4) 0.022(3) 0.003(2) 0.002(2) -0.008(3) 
C17 0.032(3) 0.038(3) 0.029(3) 0.002(3) 0.004(2) 0.004(3) 
C18 0.030(3) 0.034(3) 0.023(3) 0.003(2) 0.006(2) -0.002(2) 
C19 0.035(3) 0.033(3) 0.031(3) -0.004(3) 0.005(2) 0.000(3) 
C20 0.047(4) 0.067(5) 0.057(5) 0.006(4) 0.024(4) 0.010(4) 
C21 0.057(5) 0.035(4) 0.077(6) 0.003(4) 0.006(4) 0.007(3) 
C22 0.033(3) 0.035(3) 0.031(3) -0.001(3) 0.007(2) 0.005(2) 
C23 0.056(4) 0.041(4) 0.038(4) -0.011(3) 0.015(3) -0.012(3) 
C24 0.043(4) 0.040(4) 0.043(4) 0.002(3) 0.012(3) 0.012(3) 
C1S 0.038(4) 0.061(5) 0.042(4) -0.003(3) 0.008(3) 0.013(3) 
C2S 0.041(4) 0.066(5) 0.062(5) 0.017(4) 0.019(4) -0.005(4) 
C3S 0.045(4) 0.048(4) 0.076(6) -0.003(4) 0.013(4) -0.006(3) 
C4S 0.045(4) 0.072(5) 0.039(4) -0.005(4) -0.001(3) 0.007(4) 
C5S 0.047(4) 0.068(5) 0.049(5) 0.023(4) 0.006(3) 0.002(4) 
C6S 0.036(3) 0.037(4) 0.061(5) 0.002(3) -0.002(3) 0.002(3) 
C7S 0.051(5) 0.124(9) 0.051(5) -0.019(6) 0.007(4) 0.025(6) 
 
_geom_special_details 
; 
 All esds (except the esd in the dihedral angle between two l.s. planes) 
 are estimated using the full covariance matrix.  The cell esds are taken 
 into account individually in the estimation of esds in distances, angles 
 and torsion angles; correlations between esds in cell parameters are only 
 used when they are defined by crystal symmetry.  An approximate (isotropic) 
 treatment of cell esds is used for estimating esds involving l.s. planes. 
; 
 
loop_ 
 _geom_bond_atom_site_label_1 
 _geom_bond_atom_site_label_2 
 _geom_bond_distance 
 _geom_bond_site_symmetry_2 
 _geom_bond_publ_flag 
Au1 N3 2.042(5) 3_566 ? 
Au1 N1 2.046(5) . ? 
Au1 Au1 2.6762(4) 3_566 ? 
N1 N2 1.308(7) . ? 
N1 C1 1.456(7) . ? 
N2 N3 1.297(7) . ? 
N3 C13 1.443(8) . ? 
N3 Au1 2.042(5) 3_566 ? 
C1 C2 1.392(9) . ? 
C1 C6 1.404(9) . ? 
C2 C3 1.387(9) . ? 
C2 C10 1.540(9) . ? 
C3 C4 1.382(10) . ? 
C3 H3 0.9500 . ? 
C4 C5 1.373(10) . ? 
C4 H4 0.9500 . ? 
C5 C6 1.392(9) . ? 
C5 H5 0.9500 . ? 
C6 C7 1.522(9) . ? 
C7 C8 1.523(11) . ? 
C7 C9 1.545(10) . ? 
C7 H7 1.0000 . ? 
C8 H8A 0.9800 . ? 
C8 H8B 0.9800 . ? 
C8 H8C 0.9800 . ? 
C9 H9A 0.9800 . ? 
C9 H9B 0.9800 . ? 
C9 H9C 0.9800 . ? 
C10 C12 1.532(11) . ? 
C10 C11 1.536(10) . ? 
C10 H10 1.0000 . ? 
C11 H11A 0.9800 . ? 
C11 H11B 0.9800 . ? 
C11 H11C 0.9800 . ? 
C12 H12A 0.9800 . ? 
C12 H12B 0.9800 . ? 
C12 H12C 0.9800 . ? 
C13 C18 1.400(9) . ? 
C13 C14 1.411(9) . ? 
C14 C15 1.389(9) . ? 
C14 C19 1.516(9) . ? 
C15 C16 1.386(10) . ? 
C15 H15 0.9500 . ? 
C16 C17 1.373(10) . ? 
C16 H16 0.9500 . ? 
C17 C18 1.401(8) . ? 
C17 H17 0.9500 . ? 
C18 C22 1.524(9) . ? 
C19 C20 1.515(10) . ? 
C19 C21 1.530(10) . ? 
C19 H19 1.0000 . ? 
C20 H20A 0.9800 . ? 
C20 H20B 0.9800 . ? 
C20 H20C 0.9800 . ? 
C21 H21A 0.9800 . ? 
C21 H21B 0.9800 . ? 
C21 H21C 0.9800 . ? 
C22 C23 1.527(10) . ? 
C22 C24 1.531(9) . ? 
C22 H22 1.0000 . ? 
C23 H23A 0.9800 . ? 
C23 H23B 0.9800 . ? 
C23 H23C 0.9800 . ? 
C24 H24A 0.9800 . ? 
C24 H24B 0.9800 . ? 
C24 H24C 0.9800 . ? 
C1S C6S 1.381(12) . ? 
C1S C2S 1.395(13) . ? 
C1S C7S 1.507(12) . ? 
C2S C3S 1.392(14) . ? 
C2S H2S 0.9500 . ? 
C3S C4S 1.329(13) . ? 
C3S H3S 0.9500 . ? 
C4S C5S 1.399(13) . ? 
C4S H4S 0.9500 . ? 
C5S C6S 1.370(13) . ? 
C5S H5S 0.9500 . ? 
C6S H6S 0.9500 . ? 
C7S H7S1 0.9800 . ? 
C7S H7S2 0.9800 . ? 
C7S H7S3 0.9800 . ? 
 
loop_ 
 _geom_angle_atom_site_label_1 
 _geom_angle_atom_site_label_2 
 _geom_angle_atom_site_label_3 
 _geom_angle 
 _geom_angle_site_symmetry_1 
 _geom_angle_site_symmetry_3 
 _geom_angle_publ_flag 
N3 Au1 N1 168.0(2) 3_566 . ? 
N3 Au1 Au1 84.32(14) 3_566 3_566 ? 
N1 Au1 Au1 83.71(13) . 3_566 ? 
N2 N1 C1 112.2(5) . . ? 
N2 N1 Au1 126.4(4) . . ? 
C1 N1 Au1 121.4(4) . . ? 
N3 N2 N1 119.5(5) . . ? 
N2 N3 C13 110.8(5) . . ? 
N2 N3 Au1 126.1(4) . 3_566 ? 
C13 N3 Au1 123.1(4) . 3_566 ? 
C2 C1 C6 121.9(6) . . ? 
C2 C1 N1 119.7(6) . . ? 
C6 C1 N1 118.3(5) . . ? 
C3 C2 C1 118.6(6) . . ? 
C3 C2 C10 120.4(6) . . ? 
C1 C2 C10 121.0(6) . . ? 
C4 C3 C2 120.4(6) . . ? 
C4 C3 H3 119.8 . . ? 
C2 C3 H3 119.8 . . ? 
C5 C4 C3 120.2(6) . . ? 
C5 C4 H4 119.9 . . ? 
C3 C4 H4 119.9 . . ? 
C4 C5 C6 121.7(6) . . ? 
C4 C5 H5 119.1 . . ? 
C6 C5 H5 119.1 . . ? 
C5 C6 C1 117.1(6) . . ? 
C5 C6 C7 120.8(6) . . ? 
C1 C6 C7 122.1(5) . . ? 
C6 C7 C8 112.8(6) . . ? 
C6 C7 C9 110.1(5) . . ? 
C8 C7 C9 110.5(7) . . ? 
C6 C7 H7 107.7 . . ? 
C8 C7 H7 107.7 . . ? 
C9 C7 H7 107.7 . . ? 
C7 C8 H8A 109.5 . . ? 
C7 C8 H8B 109.5 . . ? 
H8A C8 H8B 109.5 . . ? 
C7 C8 H8C 109.5 . . ? 
H8A C8 H8C 109.5 . . ? 
H8B C8 H8C 109.5 . . ? 
C7 C9 H9A 109.5 . . ? 
C7 C9 H9B 109.5 . . ? 
H9A C9 H9B 109.5 . . ? 
C7 C9 H9C 109.5 . . ? 
H9A C9 H9C 109.5 . . ? 
H9B C9 H9C 109.5 . . ? 
C12 C10 C11 110.6(6) . . ? 
C12 C10 C2 108.9(6) . . ? 
C11 C10 C2 112.7(6) . . ? 
C12 C10 H10 108.1 . . ? 
C11 C10 H10 108.1 . . ? 
C2 C10 H10 108.1 . . ? 
C10 C11 H11A 109.5 . . ? 
C10 C11 H11B 109.5 . . ? 
H11A C11 H11B 109.5 . . ? 
C10 C11 H11C 109.5 . . ? 
H11A C11 H11C 109.5 . . ? 
H11B C11 H11C 109.5 . . ? 
C10 C12 H12A 109.5 . . ? 
C10 C12 H12B 109.5 . . ? 
H12A C12 H12B 109.5 . . ? 
C10 C12 H12C 109.5 . . ? 
H12A C12 H12C 109.5 . . ? 
H12B C12 H12C 109.5 . . ? 
C18 C13 C14 121.6(6) . . ? 
C18 C13 N3 118.4(5) . . ? 
C14 C13 N3 120.0(5) . . ? 
C15 C14 C13 117.7(6) . . ? 
C15 C14 C19 119.0(6) . . ? 
C13 C14 C19 123.3(5) . . ? 
C16 C15 C14 121.1(6) . . ? 
C16 C15 H15 119.5 . . ? 
C14 C15 H15 119.5 . . ? 
C17 C16 C15 120.7(6) . . ? 
C17 C16 H16 119.6 . . ? 
C15 C16 H16 119.6 . . ? 
C16 C17 C18 120.5(6) . . ? 
C16 C17 H17 119.8 . . ? 
C18 C17 H17 119.8 . . ? 
C13 C18 C17 118.3(6) . . ? 
C13 C18 C22 121.8(5) . . ? 
C17 C18 C22 119.8(5) . . ? 
C20 C19 C14 111.8(6) . . ? 
C20 C19 C21 111.2(7) . . ? 
C14 C19 C21 110.3(5) . . ? 
C20 C19 H19 107.8 . . ? 
C14 C19 H19 107.8 . . ? 
C21 C19 H19 107.8 . . ? 
C19 C20 H20A 109.5 . . ? 
C19 C20 H20B 109.5 . . ? 
H20A C20 H20B 109.5 . . ? 
C19 C20 H20C 109.5 . . ? 
H20A C20 H20C 109.5 . . ? 
H20B C20 H20C 109.5 . . ? 
C19 C21 H21A 109.5 . . ? 
C19 C21 H21B 109.5 . . ? 
H21A C21 H21B 109.5 . . ? 
C19 C21 H21C 109.5 . . ? 
H21A C21 H21C 109.5 . . ? 
H21B C21 H21C 109.5 . . ? 
C18 C22 C23 109.4(5) . . ? 
C18 C22 C24 112.2(5) . . ? 
C23 C22 C24 109.9(6) . . ? 
C18 C22 H22 108.4 . . ? 
C23 C22 H22 108.4 . . ? 
C24 C22 H22 108.4 . . ? 
C22 C23 H23A 109.5 . . ? 
C22 C23 H23B 109.5 . . ? 
H23A C23 H23B 109.5 . . ? 
C22 C23 H23C 109.5 . . ? 
H23A C23 H23C 109.5 . . ? 
H23B C23 H23C 109.5 . . ? 
C22 C24 H24A 109.5 . . ? 
C22 C24 H24B 109.5 . . ? 
H24A C24 H24B 109.5 . . ? 
C22 C24 H24C 109.5 . . ? 
H24A C24 H24C 109.5 . . ? 
H24B C24 H24C 109.5 . . ? 
C6S C1S C2S 117.1(7) . . ? 
C6S C1S C7S 121.1(9) . . ? 
C2S C1S C7S 121.8(9) . . ? 
C3S C2S C1S 121.0(8) . . ? 
C3S C2S H2S 119.5 . . ? 
C1S C2S H2S 119.5 . . ? 
C4S C3S C2S 120.9(8) . . ? 
C4S C3S H3S 119.5 . . ? 
C2S C3S H3S 119.5 . . ? 
C3S C4S C5S 119.3(8) . . ? 
C3S C4S H4S 120.3 . . ? 
C5S C4S H4S 120.3 . . ? 
C6S C5S C4S 120.3(8) . . ? 
C6S C5S H5S 119.9 . . ? 
C4S C5S H5S 119.9 . . ? 
C5S C6S C1S 121.4(7) . . ? 
C5S C6S H6S 119.3 . . ? 
C1S C6S H6S 119.3 . . ? 
C1S C7S H7S1 109.5 . . ? 
C1S C7S H7S2 109.5 . . ? 
H7S1 C7S H7S2 109.5 . . ? 
C1S C7S H7S3 109.5 . . ? 
H7S1 C7S H7S3 109.5 . . ? 
H7S2 C7S H7S3 109.5 . . ? 
 
loop_ 
 _geom_torsion_atom_site_label_1 
 _geom_torsion_atom_site_label_2 
 _geom_torsion_atom_site_label_3 
 _geom_torsion_atom_site_label_4 
 _geom_torsion 
 _geom_torsion_site_symmetry_1 
 _geom_torsion_site_symmetry_2 
 _geom_torsion_site_symmetry_3 
 _geom_torsion_site_symmetry_4 
 _geom_torsion_publ_flag 
N3 Au1 N1 N2 2.2(13) 3_566 . . . ? 
Au1 Au1 N1 N2 0.0(5) 3_566 . . . ? 
N3 Au1 N1 C1 -174.9(8) 3_566 . . . ? 
Au1 Au1 N1 C1 -177.0(5) 3_566 . . . ? 
C1 N1 N2 N3 178.1(5) . . . . ? 
Au1 N1 N2 N3 0.8(8) . . . . ? 
N1 N2 N3 C13 179.4(5) . . . . ? 
N1 N2 N3 Au1 -1.5(8) . . . 3_566 ? 
N2 N1 C1 C2 -89.6(7) . . . . ? 
Au1 N1 C1 C2 87.8(6) . . . . ? 
N2 N1 C1 C6 93.0(6) . . . . ? 
Au1 N1 C1 C6 -89.6(6) . . . . ? 
C6 C1 C2 C3 0.1(10) . . . . ? 
N1 C1 C2 C3 -177.2(6) . . . . ? 
C6 C1 C2 C10 177.3(6) . . . . ? 
N1 C1 C2 C10 0.0(9) . . . . ? 
C1 C2 C3 C4 0.3(10) . . . . ? 
C10 C2 C3 C4 -176.9(6) . . . . ? 
C2 C3 C4 C5 -0.3(10) . . . . ? 
C3 C4 C5 C6 -0.3(10) . . . . ? 
C4 C5 C6 C1 0.8(9) . . . . ? 
C4 C5 C6 C7 178.6(6) . . . . ? 
C2 C1 C6 C5 -0.7(9) . . . . ? 
N1 C1 C6 C5 176.7(5) . . . . ? 
C2 C1 C6 C7 -178.5(6) . . . . ? 
N1 C1 C6 C7 -1.1(8) . . . . ? 
C5 C6 C7 C8 37.4(9) . . . . ? 
C1 C6 C7 C8 -144.9(7) . . . . ? 
C5 C6 C7 C9 -86.6(8) . . . . ? 
C1 C6 C7 C9 91.1(8) . . . . ? 
C3 C2 C10 C12 82.6(8) . . . . ? 
C1 C2 C10 C12 -94.6(7) . . . . ? 
C3 C2 C10 C11 -40.6(9) . . . . ? 
C1 C2 C10 C11 142.2(6) . . . . ? 
N2 N3 C13 C18 -100.1(6) . . . . ? 
Au1 N3 C13 C18 80.7(6) 3_566 . . . ? 
N2 N3 C13 C14 82.0(7) . . . . ? 
Au1 N3 C13 C14 -97.2(6) 3_566 . . . ? 
C18 C13 C14 C15 5.1(9) . . . . ? 
N3 C13 C14 C15 -177.1(5) . . . . ? 
C18 C13 C14 C19 -174.4(5) . . . . ? 
N3 C13 C14 C19 3.4(9) . . . . ? 
C13 C14 C15 C16 -2.6(9) . . . . ? 
C19 C14 C15 C16 177.0(6) . . . . ? 
C14 C15 C16 C17 -0.6(10) . . . . ? 
C15 C16 C17 C18 1.4(10) . . . . ? 
C14 C13 C18 C17 -4.4(8) . . . . ? 
N3 C13 C18 C17 177.8(5) . . . . ? 
C14 C13 C18 C22 179.3(6) . . . . ? 
N3 C13 C18 C22 1.5(8) . . . . ? 
C16 C17 C18 C13 1.1(9) . . . . ? 
C16 C17 C18 C22 177.5(6) . . . . ? 
C15 C14 C19 C20 65.8(8) . . . . ? 
C13 C14 C19 C20 -114.7(7) . . . . ? 
C15 C14 C19 C21 -58.4(8) . . . . ? 
C13 C14 C19 C21 121.1(7) . . . . ? 
C13 C18 C22 C23 100.6(7) . . . . ? 
C17 C18 C22 C23 -75.6(7) . . . . ? 
C13 C18 C22 C24 -137.1(6) . . . . ? 
C17 C18 C22 C24 46.6(8) . . . . ? 
C6S C1S C2S C3S -0.6(11) . . . . ? 
C7S C1S C2S C3S 177.3(8) . . . . ? 
C1S C2S C3S C4S -0.3(13) . . . . ? 
C2S C3S C4S C5S 1.0(12) . . . . ? 
C3S C4S C5S C6S -0.8(12) . . . . ? 
C4S C5S C6S C1S -0.1(11) . . . . ? 
C2S C1S C6S C5S 0.8(11) . . . . ? 
C7S C1S C6S C5S -177.2(7) . . . . ? 
 
_diffrn_measured_fraction_theta_max    0.969 
_diffrn_reflns_theta_full              27.48 
_diffrn_measured_fraction_theta_full   0.969 
_refine_diff_density_max    4.751 
_refine_diff_density_min   -4.512 
_refine_diff_density_rms    0.220 


#===END

data_Cu3L2Mes:2Tol
 
_audit_creation_method            SHELXL-97 
_chemical_name_systematic 
; 
 ? 
; 
_chemical_name_common             ? 
_chemical_melting_point           ? 
_chemical_formula_moiety          ? 
_chemical_formula_sum 
 'C71 H95 Cu3 N6' 
_chemical_formula_weight          1223.15 
 
loop_ 
 _atom_type_symbol 
 _atom_type_description 
 _atom_type_scat_dispersion_real 
 _atom_type_scat_dispersion_imag 
 _atom_type_scat_source 
 'C'  'C'   0.0033   0.0016 
 'International Tables Vol C Tables 4.2.6.8 and 6.1.1.4' 
 'H'  'H'   0.0000   0.0000 
 'International Tables Vol C Tables 4.2.6.8 and 6.1.1.4' 
 'Cu'  'Cu'   0.3201   1.2651 
 'International Tables Vol C Tables 4.2.6.8 and 6.1.1.4' 
 'N'  'N'   0.0061   0.0033 
 'International Tables Vol C Tables 4.2.6.8 and 6.1.1.4' 
 
_symmetry_cell_setting            Triclinic 
_symmetry_space_group_name_H-M    P-1 
 
loop_ 
 _symmetry_equiv_pos_as_xyz 
 'x, y, z' 
 '-x, -y, -z' 
 
_cell_length_a                    11.5430(2) 
_cell_length_b                    15.3140(2) 
_cell_length_c                    20.2000(3) 
_cell_angle_alpha                 71.6040(10) 
_cell_angle_beta                  81.2990(10) 
_cell_angle_gamma                 83.8170(10) 
_cell_volume                      3342.43(9) 
_cell_formula_units_Z             2 
_cell_measurement_temperature     150(2) 
_cell_measurement_reflns_used     53645 
_cell_measurement_theta_min       8.53 
_cell_measurement_theta_max       27.56 
 
_exptl_crystal_description        Block 
_exptl_crystal_colour             Colorless 
_exptl_crystal_size_max           0.40 
_exptl_crystal_size_mid           0.20 
_exptl_crystal_size_min           0.20 
_exptl_crystal_density_meas       ? 
_exptl_crystal_density_diffrn     1.215 
_exptl_crystal_density_method     'not measured' 
_exptl_crystal_F_000              1300 
_exptl_absorpt_coefficient_mu     0.989 
_exptl_absorpt_correction_type    Multi-scan 
_exptl_absorpt_correction_T_min   0.6930 
_exptl_absorpt_correction_T_max   0.8267 
_exptl_absorpt_process_details    'SORTAV (Blessing, 1995)' 
 
_exptl_special_details 
; 
 ? 
; 
 
_diffrn_ambient_temperature       150(2) 
_diffrn_radiation_wavelength      0.71073 
_diffrn_radiation_type            MoK\a 
_diffrn_radiation_source          'fine-focus sealed tube' 
_diffrn_radiation_monochromator   graphite 
_diffrn_measurement_device_type   'Bruker Kappa CCD Diffractometer'
_diffrn_measurement_method        'omega and phi scans'
_diffrn_detector_area_resol_mean  ?
_diffrn_standards_number          0
_diffrn_standards_interval_count  0
_diffrn_standards_interval_time   0
_diffrn_standards_decay_%         0
_diffrn_reflns_number             53645 
_diffrn_reflns_av_R_equivalents   0.0528 
_diffrn_reflns_av_sigmaI/netI     0.0566 
_diffrn_reflns_limit_h_min        -14 
_diffrn_reflns_limit_h_max        15 
_diffrn_reflns_limit_k_min        -19 
_diffrn_reflns_limit_k_max        19 
_diffrn_reflns_limit_l_min        -26 
_diffrn_reflns_limit_l_max        26 
_diffrn_reflns_theta_min          8.53 
_diffrn_reflns_theta_max          27.56 
_reflns_number_total              14779 
_reflns_number_gt                 10898 
_reflns_threshold_expression      >2sigma(I) 
 
_computing_data_collection        'Kappa CCD'
_computing_cell_refinement        
                    'HKL Scalepack (Otwinowski & Minor 1997)'
_computing_data_reduction         
              'Denzo and Scalepak (Otwinowski & Minor, 1997)'
_computing_structure_solution     'SHELXS-86 (Sheldrick, 1986)'
_computing_structure_refinement   'SHELXL-97 (Sheldrick, 1997)'
_computing_molecular_graphics     'ORTEP 3 for Windows (Farrugia, 1997)'
_computing_publication_material   'SHELXL-97 (Sheldrick, 1997)'
 
_refine_special_details 
; 
 Refinement of F^2^ against ALL reflections.  The weighted R-factor wR and 
 goodness of fit S are based on F^2^, conventional R-factors R are based 
 on F, with F set to zero for negative F^2^. The threshold expression of 
 F^2^ > 2sigma(F^2^) is used only for calculating R-factors(gt) etc. and is 
 not relevant to the choice of reflections for refinement.  R-factors based 
 on F^2^ are statistically about twice as large as those based on F, and R- 
 factors based on ALL data will be even larger. 
; 
 
_refine_ls_structure_factor_coef  Fsqd  
_refine_ls_matrix_type            full 
_refine_ls_weighting_scheme       calc  
_refine_ls_weighting_details 
 'calc w=1/[\s^2^(Fo^2^)+(0.0415P)^2^+1.6134P] where P=(Fo^2^+2Fc^2^)/3' 
_atom_sites_solution_primary      direct 
_atom_sites_solution_secondary    difmap 
_atom_sites_solution_hydrogens    geom 
_refine_ls_hydrogen_treatment     Constr 
_refine_ls_extinction_method      none 
_refine_ls_extinction_coef        ? 
_refine_ls_number_reflns          14779 
_refine_ls_number_parameters      724 
_refine_ls_number_restraints      0 
_refine_ls_R_factor_all           0.0690 
_refine_ls_R_factor_gt            0.0404 
_refine_ls_wR_factor_ref          0.0993 
_refine_ls_wR_factor_gt           0.0872 
_refine_ls_goodness_of_fit_ref    1.023 
_refine_ls_restrained_S_all       1.023 
_refine_ls_shift/su_max           0.001 
_refine_ls_shift/su_mean          0.000 
 
loop_ 
 _atom_site_label 
 _atom_site_type_symbol 
 _atom_site_fract_x 
 _atom_site_fract_y 
 _atom_site_fract_z 
 _atom_site_U_iso_or_equiv 
 _atom_site_adp_type 
 _atom_site_occupancy 
 _atom_site_symmetry_multiplicity 
 _atom_site_calc_flag 
 _atom_site_refinement_flags 
 _atom_site_disorder_assembly 
 _atom_site_disorder_group 
Cu1 Cu 0.24278(2) 0.218198(16) 0.183976(13) 0.02092(7) Uani 1 1 d . . . 
Cu2 Cu 0.31367(2) 0.153535(17) 0.313432(13) 0.02278(7) Uani 1 1 d . . . 
Cu3 Cu 0.32941(2) 0.046301(17) 0.244778(13) 0.02418(8) Uani 1 1 d . . . 
N1 N 0.14631(15) 0.28930(11) 0.23476(9) 0.0204(4) Uani 1 1 d . . . 
N2 N 0.16095(15) 0.31302(11) 0.28919(9) 0.0211(4) Uani 1 1 d . . . 
N3 N 0.24747(15) 0.26842(12) 0.32250(9) 0.0217(4) Uani 1 1 d . . . 
N4 N 0.31002(16) 0.18377(11) 0.10366(9) 0.0228(4) Uani 1 1 d . . . 
N5 N 0.32925(17) 0.10175(12) 0.09663(10) 0.0263(4) Uani 1 1 d . . . 
N6 N 0.31927(18) 0.03521(12) 0.15565(10) 0.0276(4) Uani 1 1 d . . . 
C1 C 0.04363(18) 0.33635(14) 0.20298(11) 0.0219(4) Uani 1 1 d . . . 
C2 C -0.06196(19) 0.29234(15) 0.22259(12) 0.0262(5) Uani 1 1 d . . . 
C3 C -0.1570(2) 0.33471(17) 0.18737(13) 0.0319(5) Uani 1 1 d . . . 
H3 H -0.2294 0.3059 0.1997 0.038 Uiso 1 1 calc R . . 
C4 C -0.1483(2) 0.41760(17) 0.13490(13) 0.0337(5) Uani 1 1 d . . . 
H4 H -0.2142 0.4451 0.1110 0.040 Uiso 1 1 calc R . . 
C5 C -0.0442(2) 0.46093(16) 0.11682(13) 0.0326(5) Uani 1 1 d . . . 
H5 H -0.0397 0.5189 0.0812 0.039 Uiso 1 1 calc R . . 
C6 C 0.0544(2) 0.42116(15) 0.14988(12) 0.0264(5) Uani 1 1 d . . . 
C7 C 0.1691(2) 0.46893(16) 0.12912(13) 0.0334(5) Uani 1 1 d . . . 
H7 H 0.2315 0.4230 0.1511 0.040 Uiso 1 1 calc R . . 
C8 C 0.2050(3) 0.4980(2) 0.05022(15) 0.0449(6) Uani 1 1 d . . . 
H8A H 0.2052 0.4450 0.0330 0.067 Uiso 1 1 calc R . . 
H8B H 0.2839 0.5210 0.0396 0.067 Uiso 1 1 calc R . . 
H8C H 0.1492 0.5469 0.0272 0.067 Uiso 1 1 calc R . . 
C9 C 0.1641(3) 0.5492(3) 0.1579(2) 0.0627(9) Uani 1 1 d . . . 
H9A H 0.1041 0.5960 0.1372 0.094 Uiso 1 1 calc R . . 
H9B H 0.2407 0.5760 0.1461 0.094 Uiso 1 1 calc R . . 
H9C H 0.1443 0.5277 0.2091 0.094 Uiso 1 1 calc R . . 
C10 C -0.0736(2) 0.19953(16) 0.27954(13) 0.0333(5) Uani 1 1 d . . . 
H10 H -0.0040 0.1879 0.3059 0.040 Uiso 1 1 calc R . . 
C11 C -0.0711(3) 0.12229(19) 0.24661(18) 0.0539(8) Uani 1 1 d . . . 
H11A H -0.1369 0.1333 0.2189 0.081 Uiso 1 1 calc R . . 
H11B H -0.0780 0.0631 0.2838 0.081 Uiso 1 1 calc R . . 
H11C H 0.0031 0.1209 0.2160 0.081 Uiso 1 1 calc R . . 
C12 C -0.1836(2) 0.1990(2) 0.33206(15) 0.0445(6) Uani 1 1 d . . . 
H12A H -0.1836 0.2495 0.3522 0.067 Uiso 1 1 calc R . . 
H12B H -0.1845 0.1401 0.3697 0.067 Uiso 1 1 calc R . . 
H12C H -0.2535 0.2072 0.3080 0.067 Uiso 1 1 calc R . . 
C13 C 0.25745(19) 0.29991(14) 0.38176(11) 0.0240(4) Uani 1 1 d . . . 
C14 C 0.3219(2) 0.37706(15) 0.37146(12) 0.0282(5) Uani 1 1 d . . . 
C15 C 0.3243(3) 0.40803(18) 0.42874(13) 0.0390(6) Uani 1 1 d . . . 
H15 H 0.3648 0.4614 0.4227 0.047 Uiso 1 1 calc R . . 
C16 C 0.2689(3) 0.3628(2) 0.49447(14) 0.0435(6) Uani 1 1 d . . . 
H16 H 0.2712 0.3854 0.5330 0.052 Uiso 1 1 calc R . . 
C17 C 0.2104(2) 0.28516(19) 0.50417(13) 0.0402(6) Uani 1 1 d . . . 
H17 H 0.1744 0.2536 0.5498 0.048 Uiso 1 1 calc R . . 
C18 C 0.2029(2) 0.25196(16) 0.44836(12) 0.0300(5) Uani 1 1 d . . . 
C19 C 0.1320(2) 0.16974(17) 0.45897(13) 0.0329(5) Uani 1 1 d . . . 
H19 H 0.1571 0.1467 0.4175 0.039 Uiso 1 1 calc R . . 
C20 C 0.0022(3) 0.1996(2) 0.45834(17) 0.0497(7) Uani 1 1 d . . . 
H20A H -0.0262 0.2214 0.4990 0.075 Uiso 1 1 calc R . . 
H20B H -0.0417 0.1472 0.4606 0.075 Uiso 1 1 calc R . . 
H20C H -0.0091 0.2496 0.4150 0.075 Uiso 1 1 calc R . . 
C21 C 0.1529(3) 0.0900(2) 0.52391(16) 0.0486(7) Uani 1 1 d . . . 
H21A H 0.2365 0.0699 0.5217 0.073 Uiso 1 1 calc R . . 
H21B H 0.1067 0.0388 0.5262 0.073 Uiso 1 1 calc R . . 
H21C H 0.1288 0.1098 0.5659 0.073 Uiso 1 1 calc R . . 
C22 C 0.3904(2) 0.42308(15) 0.30038(12) 0.0300(5) Uani 1 1 d . . . 
H22 H 0.3485 0.4150 0.2630 0.036 Uiso 1 1 calc R . . 
C23 C 0.5117(3) 0.3736(2) 0.29623(15) 0.0443(6) Uani 1 1 d . . . 
H23A H 0.5538 0.3791 0.3332 0.066 Uiso 1 1 calc R . . 
H23B H 0.5558 0.4014 0.2501 0.066 Uiso 1 1 calc R . . 
H23C H 0.5036 0.3082 0.3027 0.066 Uiso 1 1 calc R . . 
C24 C 0.4014(3) 0.52593(18) 0.28554(16) 0.0483(7) Uani 1 1 d . . . 
H24A H 0.3232 0.5563 0.2922 0.073 Uiso 1 1 calc R . . 
H24B H 0.4373 0.5524 0.2370 0.073 Uiso 1 1 calc R . . 
H24C H 0.4507 0.5353 0.3179 0.073 Uiso 1 1 calc R . . 
C25 C 0.3367(2) 0.25504(14) 0.03749(11) 0.0237(4) Uani 1 1 d . . . 
C26 C 0.2607(2) 0.27795(15) -0.01463(12) 0.0276(5) Uani 1 1 d . . . 
C27 C 0.2905(2) 0.35012(16) -0.07574(12) 0.0345(5) Uani 1 1 d . . . 
H27 H 0.2415 0.3668 -0.1122 0.041 Uiso 1 1 calc R . . 
C28 C 0.3895(2) 0.39761(16) -0.08431(13) 0.0366(6) Uani 1 1 d . . . 
H28 H 0.4072 0.4470 -0.1260 0.044 Uiso 1 1 calc R . . 
C29 C 0.4624(2) 0.37382(16) -0.03277(13) 0.0350(5) Uani 1 1 d . . . 
H29 H 0.5301 0.4072 -0.0392 0.042 Uiso 1 1 calc R . . 
C30 C 0.4387(2) 0.30134(15) 0.02898(12) 0.0288(5) Uani 1 1 d . . . 
C31 C 0.5223(2) 0.27428(18) 0.08447(13) 0.0372(6) Uani 1 1 d . . . 
H31 H 0.4930 0.2189 0.1227 0.045 Uiso 1 1 calc R . . 
C32 C 0.5247(3) 0.3512(3) 0.1165(2) 0.0707(11) Uani 1 1 d . . . 
H32A H 0.5538 0.4062 0.0800 0.106 Uiso 1 1 calc R . . 
H32B H 0.5767 0.3315 0.1534 0.106 Uiso 1 1 calc R . . 
H32C H 0.4452 0.3657 0.1369 0.106 Uiso 1 1 calc R . . 
C33 C 0.6466(3) 0.2491(2) 0.05460(19) 0.0554(8) Uani 1 1 d . . . 
H33A H 0.6442 0.2007 0.0328 0.083 Uiso 1 1 calc R . . 
H33B H 0.6962 0.2269 0.0926 0.083 Uiso 1 1 calc R . . 
H33C H 0.6791 0.3038 0.0192 0.083 Uiso 1 1 calc R . . 
C34 C 0.1499(2) 0.22757(17) -0.00439(14) 0.0347(5) Uani 1 1 d . . . 
H34 H 0.1686 0.1608 0.0197 0.042 Uiso 1 1 calc R . . 
C35 C 0.0522(3) 0.2621(2) 0.04254(16) 0.0463(7) Uani 1 1 d . . . 
H35A H 0.0788 0.2542 0.0880 0.069 Uiso 1 1 calc R . . 
H35B H -0.0171 0.2268 0.0498 0.069 Uiso 1 1 calc R . . 
H35C H 0.0319 0.3276 0.0201 0.069 Uiso 1 1 calc R . . 
C36 C 0.1055(3) 0.2351(3) -0.07383(17) 0.0578(8) Uani 1 1 d . . . 
H36A H 0.0785 0.2992 -0.0962 0.087 Uiso 1 1 calc R . . 
H36B H 0.0403 0.1952 -0.0646 0.087 Uiso 1 1 calc R . . 
H36C H 0.1694 0.2159 -0.1051 0.087 Uiso 1 1 calc R . . 
C37 C 0.3370(2) -0.05487(15) 0.14583(12) 0.0330(5) Uani 1 1 d . . . 
C38 C 0.2382(3) -0.10366(18) 0.15197(15) 0.0452(7) Uani 1 1 d . . . 
C39 C 0.2573(4) -0.1916(2) 0.14365(18) 0.0597(9) Uani 1 1 d . . . 
H39 H 0.1919 -0.2263 0.1474 0.072 Uiso 1 1 calc R . . 
C40 C 0.3681(4) -0.22829(19) 0.13027(17) 0.0593(9) Uani 1 1 d . . . 
H40 H 0.3787 -0.2878 0.1242 0.071 Uiso 1 1 calc R . . 
C41 C 0.4649(3) -0.17989(18) 0.12550(15) 0.0517(8) Uani 1 1 d . . . 
H41 H 0.5414 -0.2067 0.1165 0.062 Uiso 1 1 calc R . . 
C42 C 0.4519(3) -0.09221(16) 0.13376(13) 0.0386(6) Uani 1 1 d . . . 
C43 C 0.5591(3) -0.04084(18) 0.13064(15) 0.0428(6) Uani 1 1 d . . . 
H43 H 0.5305 0.0171 0.1425 0.051 Uiso 1 1 calc R . . 
C44 C 0.6267(4) -0.0129(3) 0.05715(18) 0.0635(9) Uani 1 1 d . . . 
H44A H 0.6954 0.0195 0.0572 0.095 Uiso 1 1 calc R . . 
H44B H 0.5758 0.0279 0.0240 0.095 Uiso 1 1 calc R . . 
H44C H 0.6525 -0.0681 0.0429 0.095 Uiso 1 1 calc R . . 
C45 C 0.6396(3) -0.0962(3) 0.1848(2) 0.0687(9) Uani 1 1 d . . . 
H45A H 0.5940 -0.1146 0.2315 0.103 Uiso 1 1 calc R . . 
H45B H 0.7025 -0.0582 0.1850 0.103 Uiso 1 1 calc R . . 
H45C H 0.6738 -0.1514 0.1726 0.103 Uiso 1 1 calc R . . 
C46 C 0.1152(3) -0.0617(2) 0.1642(2) 0.0635(9) Uani 1 1 d . . . 
H46 H 0.1214 -0.0079 0.1811 0.076 Uiso 1 1 calc R . . 
C47 C 0.0355(4) -0.1282(3) 0.2201(3) 0.0815(12) Uani 1 1 d . . . 
H47A H 0.0242 -0.1802 0.2039 0.122 Uiso 1 1 calc R . . 
H47B H -0.0407 -0.0961 0.2287 0.122 Uiso 1 1 calc R . . 
H47C H 0.0717 -0.1511 0.2638 0.122 Uiso 1 1 calc R . . 
C48 C 0.0609(4) -0.0253(3) 0.0957(3) 0.0922(14) Uani 1 1 d . . . 
H48A H 0.1116 0.0192 0.0609 0.138 Uiso 1 1 calc R . . 
H48B H -0.0167 0.0050 0.1041 0.138 Uiso 1 1 calc R . . 
H48C H 0.0528 -0.0767 0.0779 0.138 Uiso 1 1 calc R . . 
C101 C 0.3663(2) 0.02137(14) 0.34063(11) 0.0253(5) Uani 1 1 d . . . 
C102 C 0.4852(2) 0.00976(16) 0.35278(13) 0.0295(5) Uani 1 1 d . . . 
C103 C 0.5178(2) -0.05385(18) 0.41400(14) 0.0394(6) Uani 1 1 d . . . 
H103 H 0.5980 -0.0608 0.4216 0.047 Uiso 1 1 calc R . . 
C104 C 0.4376(2) -0.10785(17) 0.46472(13) 0.0370(6) Uani 1 1 d . . . 
C105 C 0.3221(2) -0.09828(16) 0.45197(13) 0.0339(5) Uani 1 1 d . . . 
H105 H 0.2664 -0.1357 0.4854 0.041 Uiso 1 1 calc R . . 
C106 C 0.2852(2) -0.03539(15) 0.39152(12) 0.0268(5) Uani 1 1 d . . . 
C107 C 0.5766(2) 0.0666(2) 0.29979(16) 0.0448(6) Uani 1 1 d . . . 
H10A H 0.6552 0.0416 0.3118 0.067 Uiso 1 1 calc R . . 
H10B H 0.5651 0.1307 0.3005 0.067 Uiso 1 1 calc R . . 
H10C H 0.5688 0.0644 0.2527 0.067 Uiso 1 1 calc R . . 
C108 C 0.4755(3) -0.1746(2) 0.53151(16) 0.0586(8) Uani 1 1 d . . . 
H10D H 0.5046 -0.1405 0.5587 0.088 Uiso 1 1 calc R . . 
H10E H 0.5382 -0.2178 0.5199 0.088 Uiso 1 1 calc R . . 
H10F H 0.4085 -0.2088 0.5594 0.088 Uiso 1 1 calc R . . 
C109 C 0.1580(2) -0.02996(18) 0.38044(14) 0.0390(6) Uani 1 1 d . . . 
H10G H 0.1394 -0.0884 0.3756 0.058 Uiso 1 1 calc R . . 
H10H H 0.1440 0.0202 0.3376 0.058 Uiso 1 1 calc R . . 
H10I H 0.1080 -0.0182 0.4209 0.058 Uiso 1 1 calc R . . 
C1S C 0.3503(3) 0.70156(13) 0.39095(11) 0.0812(13) Uani 1 1 d G . . 
C2S C 0.4238(2) 0.65855(19) 0.44198(14) 0.1001(15) Uani 1 1 d G . . 
H2S H 0.5055 0.6676 0.4322 0.120 Uiso 1 1 calc R . . 
C3S C 0.3777(3) 0.60234(18) 0.50725(13) 0.171(4) Uani 1 1 d G . . 
H3S H 0.4280 0.5729 0.5421 0.205 Uiso 1 1 calc R . . 
C4S C 0.2582(2) 0.58914(13) 0.52149(11) 0.182(6) Uani 1 1 d G . . 
H4S H 0.2267 0.5507 0.5661 0.219 Uiso 1 1 calc R . . 
C5S C 0.1846(2) 0.63215(17) 0.47046(15) 0.172(4) Uani 1 1 d G . . 
H5S H 0.1029 0.6231 0.4802 0.206 Uiso 1 1 calc R . . 
C6S C 0.2307(3) 0.68836(16) 0.40519(14) 0.111(2) Uani 1 1 d G . . 
H6S H 0.1805 0.7178 0.3703 0.133 Uiso 1 1 calc R . . 
C7S C 0.3975(3) 0.76045(16) 0.32549(13) 0.149(3) Uani 1 1 d G . . 
H7S1 H 0.4800 0.7408 0.3149 0.223 Uiso 1 1 calc R . . 
H7S2 H 0.3922 0.8239 0.3275 0.223 Uiso 1 1 calc R . . 
H7S3 H 0.3532 0.7576 0.2886 0.223 Uiso 1 1 calc R . . 
C21S C 0.0667(3) 0.4447(2) 0.67250(16) 0.0517(7) Uani 1 1 d . . . 
C22S C 0.1277(3) 0.4921(2) 0.70400(18) 0.0585(9) Uani 1 1 d . . . 
H22S H 0.0983 0.5515 0.7064 0.070 Uiso 1 1 calc R . . 
C23S C 0.2307(3) 0.4526(3) 0.73182(17) 0.0616(9) Uani 1 1 d . . . 
H23S H 0.2717 0.4855 0.7528 0.074 Uiso 1 1 calc R . . 
C24S C 0.2732(4) 0.3678(3) 0.72925(19) 0.0665(9) Uani 1 1 d . . . 
H24S H 0.3443 0.3416 0.7478 0.080 Uiso 1 1 calc R . . 
C25S C 0.2141(4) 0.31972(18) 0.70009(14) 0.0677(10) Uani 1 1 d G . . 
H25S H 0.2435 0.2597 0.6991 0.081 Uiso 1 1 calc R . . 
C26S C 0.1132(3) 0.3574(2) 0.67229(17) 0.0532(8) Uani 1 1 d . . . 
H26S H 0.0734 0.3228 0.6521 0.064 Uiso 1 1 calc R . . 
C27S C -0.0416(4) 0.4871(3) 0.6405(3) 0.0835(12) Uani 1 1 d . . . 
H27A H -0.0260 0.5002 0.5893 0.125 Uiso 1 1 calc R . . 
H27B H -0.0656 0.5447 0.6517 0.125 Uiso 1 1 calc R . . 
H27C H -0.1045 0.4444 0.6592 0.125 Uiso 1 1 calc R . . 
 
loop_ 
 _atom_site_aniso_label 
 _atom_site_aniso_U_11 
 _atom_site_aniso_U_22 
 _atom_site_aniso_U_33 
 _atom_site_aniso_U_23 
 _atom_site_aniso_U_13 
 _atom_site_aniso_U_12 
Cu1 0.02159(14) 0.01873(13) 0.02205(13) -0.00570(10) -0.00332(10) -0.00033(9) 
Cu2 0.02386(14) 0.01930(13) 0.02433(14) -0.00497(10) -0.00585(11) 0.00117(10) 
Cu3 0.02904(15) 0.01881(13) 0.02316(14) -0.00415(10) -0.00358(11) -0.00124(10) 
N1 0.0182(9) 0.0195(8) 0.0221(9) -0.0038(7) -0.0047(7) -0.0005(7) 
N2 0.0201(9) 0.0199(8) 0.0225(9) -0.0048(7) -0.0029(7) -0.0021(7) 
N3 0.0205(9) 0.0222(9) 0.0232(9) -0.0066(7) -0.0070(7) 0.0002(7) 
N4 0.0265(10) 0.0180(8) 0.0236(9) -0.0053(7) -0.0040(8) -0.0022(7) 
N5 0.0323(11) 0.0202(9) 0.0258(9) -0.0060(7) -0.0036(8) -0.0024(7) 
N6 0.0378(11) 0.0186(9) 0.0257(10) -0.0066(7) -0.0014(8) -0.0023(7) 
C1 0.0207(11) 0.0227(10) 0.0233(10) -0.0080(8) -0.0064(9) 0.0021(8) 
C2 0.0219(11) 0.0275(11) 0.0296(12) -0.0087(9) -0.0049(9) -0.0006(9) 
C3 0.0213(12) 0.0364(13) 0.0394(13) -0.0116(11) -0.0077(10) -0.0013(9) 
C4 0.0251(12) 0.0368(13) 0.0387(13) -0.0088(11) -0.0140(10) 0.0062(10) 
C5 0.0323(13) 0.0270(11) 0.0339(13) -0.0015(10) -0.0113(10) 0.0044(9) 
C6 0.0249(12) 0.0248(11) 0.0280(11) -0.0058(9) -0.0053(9) 0.0004(8) 
C7 0.0288(13) 0.0285(12) 0.0369(13) 0.0016(10) -0.0088(10) -0.0040(9) 
C8 0.0400(16) 0.0467(15) 0.0457(16) -0.0104(12) 0.0029(13) -0.0153(12) 
C9 0.064(2) 0.072(2) 0.068(2) -0.0387(18) 0.0027(17) -0.0326(17) 
C10 0.0256(12) 0.0318(12) 0.0387(13) -0.0017(10) -0.0085(10) -0.0068(9) 
C11 0.062(2) 0.0321(14) 0.0620(19) -0.0073(13) -0.0058(16) -0.0052(13) 
C12 0.0309(14) 0.0525(16) 0.0438(15) -0.0037(12) -0.0020(12) -0.0134(12) 
C13 0.0233(11) 0.0258(11) 0.0241(11) -0.0090(9) -0.0061(9) 0.0015(8) 
C14 0.0312(13) 0.0276(11) 0.0280(11) -0.0093(9) -0.0085(10) -0.0020(9) 
C15 0.0499(16) 0.0373(13) 0.0348(13) -0.0141(11) -0.0081(12) -0.0119(11) 
C16 0.0580(18) 0.0518(16) 0.0291(13) -0.0223(12) -0.0028(12) -0.0132(13) 
C17 0.0446(16) 0.0505(15) 0.0257(12) -0.0132(11) 0.0028(11) -0.0100(12) 
C18 0.0278(12) 0.0348(12) 0.0278(12) -0.0100(10) -0.0028(10) -0.0025(9) 
C19 0.0312(13) 0.0373(13) 0.0286(12) -0.0077(10) 0.0015(10) -0.0101(10) 
C20 0.0346(15) 0.0527(17) 0.0538(17) -0.0001(14) -0.0093(13) -0.0116(12) 
C21 0.0440(17) 0.0429(15) 0.0527(17) -0.0004(13) -0.0121(14) -0.0108(12) 
C22 0.0351(13) 0.0291(12) 0.0270(12) -0.0069(9) -0.0061(10) -0.0090(9) 
C23 0.0425(16) 0.0461(15) 0.0386(14) -0.0084(12) 0.0030(12) -0.0035(12) 
C24 0.0577(19) 0.0332(14) 0.0495(17) -0.0087(12) 0.0054(14) -0.0119(12) 
C25 0.0298(12) 0.0191(10) 0.0222(10) -0.0065(8) -0.0042(9) 0.0005(8) 
C26 0.0334(13) 0.0237(11) 0.0268(11) -0.0090(9) -0.0067(10) 0.0020(9) 
C27 0.0442(15) 0.0323(12) 0.0249(12) -0.0070(10) -0.0092(11) 0.0087(11) 
C28 0.0472(16) 0.0262(12) 0.0264(12) 0.0014(9) 0.0025(11) 0.0014(10) 
C29 0.0343(14) 0.0282(12) 0.0378(13) -0.0047(10) 0.0020(11) -0.0076(10) 
C30 0.0314(13) 0.0263(11) 0.0265(11) -0.0041(9) -0.0040(10) -0.0036(9) 
C31 0.0312(13) 0.0440(14) 0.0333(13) -0.0028(11) -0.0076(11) -0.0118(11) 
C32 0.0467(19) 0.111(3) 0.081(2) -0.066(2) -0.0309(18) 0.0229(19) 
C33 0.0457(17) 0.0557(18) 0.069(2) -0.0237(16) -0.0226(15) 0.0159(14) 
C34 0.0365(14) 0.0305(12) 0.0421(14) -0.0139(11) -0.0152(11) -0.0013(10) 
C35 0.0368(15) 0.0576(17) 0.0498(16) -0.0225(14) -0.0023(13) -0.0120(13) 
C36 0.0530(19) 0.081(2) 0.0539(18) -0.0353(17) -0.0170(15) -0.0068(16) 
C37 0.0515(16) 0.0196(11) 0.0269(12) -0.0077(9) -0.0008(11) -0.0025(10) 
C38 0.0631(19) 0.0294(13) 0.0468(16) -0.0161(12) -0.0034(14) -0.0101(12) 
C39 0.088(3) 0.0345(15) 0.064(2) -0.0241(14) 0.0008(18) -0.0200(16) 
C40 0.103(3) 0.0233(13) 0.0518(18) -0.0179(12) 0.0077(18) -0.0076(15) 
C41 0.081(2) 0.0280(13) 0.0403(15) -0.0118(11) 0.0065(15) 0.0076(14) 
C42 0.0599(18) 0.0232(11) 0.0278(12) -0.0060(10) 0.0020(12) 0.0023(11) 
C43 0.0473(16) 0.0337(13) 0.0434(15) -0.0135(11) 0.0025(13) 0.0084(11) 
C44 0.072(2) 0.064(2) 0.0510(19) -0.0176(16) 0.0118(17) -0.0137(17) 
C45 0.064(2) 0.068(2) 0.066(2) -0.0126(18) -0.0117(18) 0.0115(17) 
C46 0.056(2) 0.0467(17) 0.101(3) -0.0374(18) -0.0084(19) -0.0173(15) 
C47 0.063(2) 0.089(3) 0.097(3) -0.035(2) 0.005(2) -0.021(2) 
C48 0.084(3) 0.058(2) 0.130(4) -0.005(2) -0.038(3) -0.022(2) 
C101 0.0268(12) 0.0206(10) 0.0264(11) -0.0045(9) -0.0035(9) -0.0001(8) 
C102 0.0249(12) 0.0291(11) 0.0364(13) -0.0116(10) -0.0082(10) 0.0016(9) 
C103 0.0298(13) 0.0449(14) 0.0443(15) -0.0124(12) -0.0168(12) 0.0068(11) 
C104 0.0435(15) 0.0340(13) 0.0297(12) -0.0044(10) -0.0129(11) 0.0100(11) 
C105 0.0389(14) 0.0272(12) 0.0289(12) -0.0013(9) -0.0024(11) 0.0024(10) 
C106 0.0269(12) 0.0245(11) 0.0269(11) -0.0050(9) -0.0043(9) 0.0008(9) 
C107 0.0268(13) 0.0490(16) 0.0555(17) -0.0104(13) -0.0025(12) -0.0094(11) 
C108 0.066(2) 0.0590(19) 0.0395(16) 0.0012(14) -0.0229(15) 0.0192(16) 
C109 0.0278(13) 0.0403(14) 0.0405(14) 0.0006(11) -0.0029(11) -0.0074(10) 
C1S 0.127(4) 0.048(2) 0.069(2) -0.0276(18) 0.014(3) -0.012(2) 
C2S 0.115(4) 0.085(3) 0.109(4) -0.021(3) -0.051(3) -0.020(3) 
C3S 0.299(12) 0.117(5) 0.129(6) -0.041(5) -0.088(7) -0.058(6) 
C4S 0.359(16) 0.107(5) 0.087(4) -0.059(4) 0.083(7) -0.109(8) 
C5S 0.169(8) 0.120(6) 0.236(10) -0.111(7) 0.094(8) -0.049(5) 
C6S 0.067(3) 0.093(3) 0.208(7) -0.101(4) -0.018(3) 0.011(2) 
C7S 0.282(9) 0.058(3) 0.091(3) -0.034(3) 0.057(5) -0.024(4) 
C21S 0.0464(17) 0.0580(18) 0.0484(17) -0.0199(14) 0.0077(14) -0.0012(14) 
C22S 0.072(2) 0.0474(17) 0.0580(19) -0.0262(15) 0.0141(17) -0.0106(16) 
C23S 0.071(2) 0.073(2) 0.0444(17) -0.0180(16) -0.0019(17) -0.0242(19) 
C24S 0.065(2) 0.076(2) 0.054(2) -0.0145(18) -0.0087(17) 0.0025(18) 
C25S 0.083(3) 0.0531(19) 0.063(2) -0.0157(17) -0.011(2) 0.0107(18) 
C26S 0.062(2) 0.0486(17) 0.0537(18) -0.0248(14) 0.0022(16) -0.0074(15) 
C27S 0.060(2) 0.091(3) 0.101(3) -0.037(2) -0.014(2) 0.015(2) 
 
_geom_special_details 
; 
 All esds (except the esd in the dihedral angle between two l.s. planes) 
 are estimated using the full covariance matrix.  The cell esds are taken 
 into account individually in the estimation of esds in distances, angles 
 and torsion angles; correlations between esds in cell parameters are only 
 used when they are defined by crystal symmetry.  An approximate (isotropic) 
 treatment of cell esds is used for estimating esds involving l.s. planes. 
; 
 
loop_ 
 _geom_bond_atom_site_label_1 
 _geom_bond_atom_site_label_2 
 _geom_bond_distance 
 _geom_bond_site_symmetry_2 
 _geom_bond_publ_flag 
Cu1 N1 1.8911(17) . ? 
Cu1 N4 1.8928(18) . ? 
Cu1 Cu3 2.6836(3) . ? 
Cu1 Cu2 2.7068(4) . ? 
Cu2 N3 1.8932(17) . ? 
Cu2 C101 1.975(2) . ? 
Cu2 Cu3 2.4393(4) . ? 
Cu3 N6 1.8828(19) . ? 
Cu3 C101 1.956(2) . ? 
N1 N2 1.300(2) . ? 
N1 C1 1.446(3) . ? 
N2 N3 1.297(2) . ? 
N3 C13 1.448(3) . ? 
N4 N5 1.300(2) . ? 
N4 C25 1.449(3) . ? 
N5 N6 1.300(3) . ? 
N6 C37 1.443(3) . ? 
C1 C2 1.400(3) . ? 
C1 C6 1.403(3) . ? 
C2 C3 1.386(3) . ? 
C2 C10 1.524(3) . ? 
C3 C4 1.375(4) . ? 
C3 H3 0.9500 . ? 
C4 C5 1.381(4) . ? 
C4 H4 0.9500 . ? 
C5 C6 1.391(3) . ? 
C5 H5 0.9500 . ? 
C6 C7 1.521(3) . ? 
C7 C9 1.510(4) . ? 
C7 C8 1.517(4) . ? 
C7 H7 1.0000 . ? 
C8 H8A 0.9800 . ? 
C8 H8B 0.9800 . ? 
C8 H8C 0.9800 . ? 
C9 H9A 0.9800 . ? 
C9 H9B 0.9800 . ? 
C9 H9C 0.9800 . ? 
C10 C11 1.525(4) . ? 
C10 C12 1.526(4) . ? 
C10 H10 1.0000 . ? 
C11 H11A 0.9800 . ? 
C11 H11B 0.9800 . ? 
C11 H11C 0.9800 . ? 
C12 H12A 0.9800 . ? 
C12 H12B 0.9800 . ? 
C12 H12C 0.9800 . ? 
C13 C18 1.402(3) . ? 
C13 C14 1.407(3) . ? 
C14 C15 1.387(3) . ? 
C14 C22 1.524(3) . ? 
C15 C16 1.382(4) . ? 
C15 H15 0.9500 . ? 
C16 C17 1.377(4) . ? 
C16 H16 0.9500 . ? 
C17 C18 1.392(3) . ? 
C17 H17 0.9500 . ? 
C18 C19 1.517(3) . ? 
C19 C21 1.513(4) . ? 
C19 C20 1.519(4) . ? 
C19 H19 1.0000 . ? 
C20 H20A 0.9800 . ? 
C20 H20B 0.9800 . ? 
C20 H20C 0.9800 . ? 
C21 H21A 0.9800 . ? 
C21 H21B 0.9800 . ? 
C21 H21C 0.9800 . ? 
C22 C23 1.523(4) . ? 
C22 C24 1.523(3) . ? 
C22 H22 1.0000 . ? 
C23 H23A 0.9800 . ? 
C23 H23B 0.9800 . ? 
C23 H23C 0.9800 . ? 
C24 H24A 0.9800 . ? 
C24 H24B 0.9800 . ? 
C24 H24C 0.9800 . ? 
C25 C30 1.400(3) . ? 
C25 C26 1.408(3) . ? 
C26 C27 1.399(3) . ? 
C26 C34 1.519(3) . ? 
C27 C28 1.380(4) . ? 
C27 H27 0.9500 . ? 
C28 C29 1.373(4) . ? 
C28 H28 0.9500 . ? 
C29 C30 1.397(3) . ? 
C29 H29 0.9500 . ? 
C30 C31 1.519(3) . ? 
C31 C32 1.518(4) . ? 
C31 C33 1.529(4) . ? 
C31 H31 1.0000 . ? 
C32 H32A 0.9800 . ? 
C32 H32B 0.9800 . ? 
C32 H32C 0.9800 . ? 
C33 H33A 0.9800 . ? 
C33 H33B 0.9800 . ? 
C33 H33C 0.9800 . ? 
C34 C35 1.521(4) . ? 
C34 C36 1.531(4) . ? 
C34 H34 1.0000 . ? 
C35 H35A 0.9800 . ? 
C35 H35B 0.9800 . ? 
C35 H35C 0.9800 . ? 
C36 H36A 0.9800 . ? 
C36 H36B 0.9800 . ? 
C36 H36C 0.9800 . ? 
C37 C38 1.399(4) . ? 
C37 C42 1.404(4) . ? 
C38 C39 1.399(4) . ? 
C38 C46 1.512(5) . ? 
C39 C40 1.364(5) . ? 
C39 H39 0.9500 . ? 
C40 C41 1.382(5) . ? 
C40 H40 0.9500 . ? 
C41 C42 1.394(4) . ? 
C41 H41 0.9500 . ? 
C42 C43 1.519(4) . ? 
C43 C44 1.522(4) . ? 
C43 C45 1.527(5) . ? 
C43 H43 1.0000 . ? 
C44 H44A 0.9800 . ? 
C44 H44B 0.9800 . ? 
C44 H44C 0.9800 . ? 
C45 H45A 0.9800 . ? 
C45 H45B 0.9800 . ? 
C45 H45C 0.9800 . ? 
C46 C48 1.523(7) . ? 
C46 C47 1.524(6) . ? 
C46 H46 1.0000 . ? 
C47 H47A 0.9800 . ? 
C47 H47B 0.9800 . ? 
C47 H47C 0.9800 . ? 
C48 H48A 0.9800 . ? 
C48 H48B 0.9800 . ? 
C48 H48C 0.9800 . ? 
C101 C102 1.413(3) . ? 
C101 C106 1.417(3) . ? 
C102 C103 1.386(4) . ? 
C102 C107 1.512(4) . ? 
C103 C104 1.390(4) . ? 
C103 H103 0.9500 . ? 
C104 C105 1.380(4) . ? 
C104 C108 1.506(4) . ? 
C105 C106 1.388(3) . ? 
C105 H105 0.9500 . ? 
C106 C109 1.508(3) . ? 
C107 H10A 0.9800 . ? 
C107 H10B 0.9800 . ? 
C107 H10C 0.9800 . ? 
C108 H10D 0.9800 . ? 
C108 H10E 0.9800 . ? 
C108 H10F 0.9800 . ? 
C109 H10G 0.9800 . ? 
C109 H10H 0.9800 . ? 
C109 H10I 0.9800 . ? 
C1S C2S 1.3900 . ? 
C1S C6S 1.3900 . ? 
C1S C7S 1.4123 . ? 
C2S C3S 1.3900 . ? 
C2S H2S 0.9500 . ? 
C3S C4S 1.3900 . ? 
C3S H3S 0.9500 . ? 
C4S C5S 1.3900 . ? 
C4S H4S 0.9500 . ? 
C5S C6S 1.3900 . ? 
C5S H5S 0.9500 . ? 
C6S H6S 0.9500 . ? 
C7S H7S1 0.9800 . ? 
C7S H7S2 0.9800 . ? 
C7S H7S3 0.9800 . ? 
C21S C26S 1.387(4) . ? 
C21S C22S 1.401(5) . ? 
C21S C27S 1.486(5) . ? 
C22S C23S 1.389(5) . ? 
C22S H22S 0.9500 . ? 
C23S C24S 1.352(5) . ? 
C23S H23S 0.9500 . ? 
C24S C25S 1.362(5) . ? 
C24S H24S 0.9500 . ? 
C25S C26S 1.362(5) . ? 
C25S H25S 0.9500 . ? 
C26S H26S 0.9500 . ? 
C27S H27A 0.9800 . ? 
C27S H27B 0.9800 . ? 
C27S H27C 0.9800 . ? 
 
loop_ 
 _geom_angle_atom_site_label_1 
 _geom_angle_atom_site_label_2 
 _geom_angle_atom_site_label_3 
 _geom_angle 
 _geom_angle_site_symmetry_1 
 _geom_angle_site_symmetry_3 
 _geom_angle_publ_flag 
N1 Cu1 N4 156.50(7) . . ? 
N1 Cu1 Cu3 123.06(5) . . ? 
N4 Cu1 Cu3 79.37(5) . . ? 
N1 Cu1 Cu2 76.76(5) . . ? 
N4 Cu1 Cu2 126.34(5) . . ? 
Cu3 Cu1 Cu2 53.808(9) . . ? 
N3 Cu2 C101 159.44(8) . . ? 
N3 Cu2 Cu3 145.63(5) . . ? 
C101 Cu2 Cu3 51.28(6) . . ? 
N3 Cu2 Cu1 83.99(5) . . ? 
C101 Cu2 Cu1 113.84(7) . . ? 
Cu3 Cu2 Cu1 62.610(10) . . ? 
N6 Cu3 C101 162.48(8) . . ? 
N6 Cu3 Cu2 144.83(5) . . ? 
C101 Cu3 Cu2 52.01(6) . . ? 
N6 Cu3 Cu1 81.69(5) . . ? 
C101 Cu3 Cu1 115.54(6) . . ? 
Cu2 Cu3 Cu1 63.581(10) . . ? 
N2 N1 C1 112.35(16) . . ? 
N2 N1 Cu1 132.08(14) . . ? 
C1 N1 Cu1 115.04(13) . . ? 
N3 N2 N1 114.91(16) . . ? 
N2 N3 C13 110.95(16) . . ? 
N2 N3 Cu2 122.29(13) . . ? 
C13 N3 Cu2 123.65(13) . . ? 
N5 N4 C25 111.77(16) . . ? 
N5 N4 Cu1 128.83(14) . . ? 
C25 N4 Cu1 119.18(13) . . ? 
N6 N5 N4 114.16(17) . . ? 
N5 N6 C37 112.74(17) . . ? 
N5 N6 Cu3 125.45(14) . . ? 
C37 N6 Cu3 119.13(15) . . ? 
C2 C1 C6 121.82(19) . . ? 
C2 C1 N1 118.64(18) . . ? 
C6 C1 N1 119.36(19) . . ? 
C3 C2 C1 118.0(2) . . ? 
C3 C2 C10 120.0(2) . . ? 
C1 C2 C10 122.01(19) . . ? 
C4 C3 C2 121.2(2) . . ? 
C4 C3 H3 119.4 . . ? 
C2 C3 H3 119.4 . . ? 
C3 C4 C5 120.2(2) . . ? 
C3 C4 H4 119.9 . . ? 
C5 C4 H4 119.9 . . ? 
C4 C5 C6 121.1(2) . . ? 
C4 C5 H5 119.5 . . ? 
C6 C5 H5 119.5 . . ? 
C5 C6 C1 117.7(2) . . ? 
C5 C6 C7 120.7(2) . . ? 
C1 C6 C7 121.6(2) . . ? 
C9 C7 C8 111.4(2) . . ? 
C9 C7 C6 111.5(2) . . ? 
C8 C7 C6 112.1(2) . . ? 
C9 C7 H7 107.2 . . ? 
C8 C7 H7 107.2 . . ? 
C6 C7 H7 107.2 . . ? 
C7 C8 H8A 109.5 . . ? 
C7 C8 H8B 109.5 . . ? 
H8A C8 H8B 109.5 . . ? 
C7 C8 H8C 109.5 . . ? 
H8A C8 H8C 109.5 . . ? 
H8B C8 H8C 109.5 . . ? 
C7 C9 H9A 109.5 . . ? 
C7 C9 H9B 109.5 . . ? 
H9A C9 H9B 109.5 . . ? 
C7 C9 H9C 109.5 . . ? 
H9A C9 H9C 109.5 . . ? 
H9B C9 H9C 109.5 . . ? 
C2 C10 C11 110.4(2) . . ? 
C2 C10 C12 112.1(2) . . ? 
C11 C10 C12 111.0(2) . . ? 
C2 C10 H10 107.7 . . ? 
C11 C10 H10 107.7 . . ? 
C12 C10 H10 107.7 . . ? 
C10 C11 H11A 109.5 . . ? 
C10 C11 H11B 109.5 . . ? 
H11A C11 H11B 109.5 . . ? 
C10 C11 H11C 109.5 . . ? 
H11A C11 H11C 109.5 . . ? 
H11B C11 H11C 109.5 . . ? 
C10 C12 H12A 109.5 . . ? 
C10 C12 H12B 109.5 . . ? 
H12A C12 H12B 109.5 . . ? 
C10 C12 H12C 109.5 . . ? 
H12A C12 H12C 109.5 . . ? 
H12B C12 H12C 109.5 . . ? 
C18 C13 C14 121.6(2) . . ? 
C18 C13 N3 118.83(19) . . ? 
C14 C13 N3 119.57(19) . . ? 
C15 C14 C13 117.8(2) . . ? 
C15 C14 C22 121.0(2) . . ? 
C13 C14 C22 121.14(19) . . ? 
C16 C15 C14 121.3(2) . . ? 
C16 C15 H15 119.4 . . ? 
C14 C15 H15 119.4 . . ? 
C17 C16 C15 120.0(2) . . ? 
C17 C16 H16 120.0 . . ? 
C15 C16 H16 120.0 . . ? 
C16 C17 C18 121.3(2) . . ? 
C16 C17 H17 119.4 . . ? 
C18 C17 H17 119.4 . . ? 
C17 C18 C13 117.9(2) . . ? 
C17 C18 C19 120.6(2) . . ? 
C13 C18 C19 121.4(2) . . ? 
C21 C19 C18 114.1(2) . . ? 
C21 C19 C20 111.2(2) . . ? 
C18 C19 C20 110.3(2) . . ? 
C21 C19 H19 107.0 . . ? 
C18 C19 H19 107.0 . . ? 
C20 C19 H19 107.0 . . ? 
C19 C20 H20A 109.5 . . ? 
C19 C20 H20B 109.5 . . ? 
H20A C20 H20B 109.5 . . ? 
C19 C20 H20C 109.5 . . ? 
H20A C20 H20C 109.5 . . ? 
H20B C20 H20C 109.5 . . ? 
C19 C21 H21A 109.5 . . ? 
C19 C21 H21B 109.5 . . ? 
H21A C21 H21B 109.5 . . ? 
C19 C21 H21C 109.5 . . ? 
H21A C21 H21C 109.5 . . ? 
H21B C21 H21C 109.5 . . ? 
C23 C22 C24 110.2(2) . . ? 
C23 C22 C14 108.8(2) . . ? 
C24 C22 C14 113.9(2) . . ? 
C23 C22 H22 107.9 . . ? 
C24 C22 H22 107.9 . . ? 
C14 C22 H22 107.9 . . ? 
C22 C23 H23A 109.5 . . ? 
C22 C23 H23B 109.5 . . ? 
H23A C23 H23B 109.5 . . ? 
C22 C23 H23C 109.5 . . ? 
H23A C23 H23C 109.5 . . ? 
H23B C23 H23C 109.5 . . ? 
C22 C24 H24A 109.5 . . ? 
C22 C24 H24B 109.5 . . ? 
H24A C24 H24B 109.5 . . ? 
C22 C24 H24C 109.5 . . ? 
H24A C24 H24C 109.5 . . ? 
H24B C24 H24C 109.5 . . ? 
C30 C25 C26 122.0(2) . . ? 
C30 C25 N4 117.10(19) . . ? 
C26 C25 N4 120.86(19) . . ? 
C27 C26 C25 117.2(2) . . ? 
C27 C26 C34 121.4(2) . . ? 
C25 C26 C34 121.4(2) . . ? 
C28 C27 C26 121.5(2) . . ? 
C28 C27 H27 119.3 . . ? 
C26 C27 H27 119.3 . . ? 
C29 C28 C27 120.3(2) . . ? 
C29 C28 H28 119.9 . . ? 
C27 C28 H28 119.9 . . ? 
C28 C29 C30 121.1(2) . . ? 
C28 C29 H29 119.5 . . ? 
C30 C29 H29 119.5 . . ? 
C29 C30 C25 118.0(2) . . ? 
C29 C30 C31 120.3(2) . . ? 
C25 C30 C31 121.7(2) . . ? 
C32 C31 C30 110.8(2) . . ? 
C32 C31 C33 109.9(2) . . ? 
C30 C31 C33 111.8(2) . . ? 
C32 C31 H31 108.1 . . ? 
C30 C31 H31 108.1 . . ? 
C33 C31 H31 108.1 . . ? 
C31 C32 H32A 109.5 . . ? 
C31 C32 H32B 109.5 . . ? 
H32A C32 H32B 109.5 . . ? 
C31 C32 H32C 109.5 . . ? 
H32A C32 H32C 109.5 . . ? 
H32B C32 H32C 109.5 . . ? 
C31 C33 H33A 109.5 . . ? 
C31 C33 H33B 109.5 . . ? 
H33A C33 H33B 109.5 . . ? 
C31 C33 H33C 109.5 . . ? 
H33A C33 H33C 109.5 . . ? 
H33B C33 H33C 109.5 . . ? 
C26 C34 C35 111.2(2) . . ? 
C26 C34 C36 112.9(2) . . ? 
C35 C34 C36 109.3(2) . . ? 
C26 C34 H34 107.7 . . ? 
C35 C34 H34 107.7 . . ? 
C36 C34 H34 107.7 . . ? 
C34 C35 H35A 109.5 . . ? 
C34 C35 H35B 109.5 . . ? 
H35A C35 H35B 109.5 . . ? 
C34 C35 H35C 109.5 . . ? 
H35A C35 H35C 109.5 . . ? 
H35B C35 H35C 109.5 . . ? 
C34 C36 H36A 109.5 . . ? 
C34 C36 H36B 109.5 . . ? 
H36A C36 H36B 109.5 . . ? 
C34 C36 H36C 109.5 . . ? 
H36A C36 H36C 109.5 . . ? 
H36B C36 H36C 109.5 . . ? 
C38 C37 C42 122.3(2) . . ? 
C38 C37 N6 118.3(2) . . ? 
C42 C37 N6 119.4(2) . . ? 
C39 C38 C37 117.4(3) . . ? 
C39 C38 C46 121.1(3) . . ? 
C37 C38 C46 121.4(2) . . ? 
C40 C39 C38 121.2(3) . . ? 
C40 C39 H39 119.4 . . ? 
C38 C39 H39 119.4 . . ? 
C39 C40 C41 120.7(3) . . ? 
C39 C40 H40 119.6 . . ? 
C41 C40 H40 119.6 . . ? 
C40 C41 C42 120.9(3) . . ? 
C40 C41 H41 119.5 . . ? 
C42 C41 H41 119.5 . . ? 
C41 C42 C37 117.4(3) . . ? 
C41 C42 C43 120.4(3) . . ? 
C37 C42 C43 122.1(2) . . ? 
C42 C43 C44 111.8(3) . . ? 
C42 C43 C45 111.9(3) . . ? 
C44 C43 C45 110.8(3) . . ? 
C42 C43 H43 107.4 . . ? 
C44 C43 H43 107.4 . . ? 
C45 C43 H43 107.4 . . ? 
C43 C44 H44A 109.5 . . ? 
C43 C44 H44B 109.5 . . ? 
H44A C44 H44B 109.5 . . ? 
C43 C44 H44C 109.5 . . ? 
H44A C44 H44C 109.5 . . ? 
H44B C44 H44C 109.5 . . ? 
C43 C45 H45A 109.5 . . ? 
C43 C45 H45B 109.5 . . ? 
H45A C45 H45B 109.5 . . ? 
C43 C45 H45C 109.5 . . ? 
H45A C45 H45C 109.5 . . ? 
H45B C45 H45C 109.5 . . ? 
C38 C46 C48 110.7(3) . . ? 
C38 C46 C47 112.9(3) . . ? 
C48 C46 C47 110.5(3) . . ? 
C38 C46 H46 107.5 . . ? 
C48 C46 H46 107.5 . . ? 
C47 C46 H46 107.5 . . ? 
C46 C47 H47A 109.5 . . ? 
C46 C47 H47B 109.5 . . ? 
H47A C47 H47B 109.5 . . ? 
C46 C47 H47C 109.5 . . ? 
H47A C47 H47C 109.5 . . ? 
H47B C47 H47C 109.5 . . ? 
C46 C48 H48A 109.5 . . ? 
C46 C48 H48B 109.5 . . ? 
H48A C48 H48B 109.5 . . ? 
C46 C48 H48C 109.5 . . ? 
H48A C48 H48C 109.5 . . ? 
H48B C48 H48C 109.5 . . ? 
C102 C101 C106 117.8(2) . . ? 
C102 C101 Cu3 119.07(16) . . ? 
C106 C101 Cu3 112.46(16) . . ? 
C102 C101 Cu2 110.26(15) . . ? 
C106 C101 Cu2 113.40(15) . . ? 
Cu3 C101 Cu2 76.71(8) . . ? 
C103 C102 C101 119.6(2) . . ? 
C103 C102 C107 119.9(2) . . ? 
C101 C102 C107 120.5(2) . . ? 
C102 C103 C104 122.5(2) . . ? 
C102 C103 H103 118.7 . . ? 
C104 C103 H103 118.7 . . ? 
C105 C104 C103 117.9(2) . . ? 
C105 C104 C108 121.0(3) . . ? 
C103 C104 C108 121.1(3) . . ? 
C104 C105 C106 121.7(2) . . ? 
C104 C105 H105 119.1 . . ? 
C106 C105 H105 119.1 . . ? 
C105 C106 C101 120.4(2) . . ? 
C105 C106 C109 118.8(2) . . ? 
C101 C106 C109 120.8(2) . . ? 
C102 C107 H10A 109.5 . . ? 
C102 C107 H10B 109.5 . . ? 
H10A C107 H10B 109.5 . . ? 
C102 C107 H10C 109.5 . . ? 
H10A C107 H10C 109.5 . . ? 
H10B C107 H10C 109.5 . . ? 
C104 C108 H10D 109.5 . . ? 
C104 C108 H10E 109.5 . . ? 
H10D C108 H10E 109.5 . . ? 
C104 C108 H10F 109.5 . . ? 
H10D C108 H10F 109.5 . . ? 
H10E C108 H10F 109.5 . . ? 
C106 C109 H10G 109.5 . . ? 
C106 C109 H10H 109.5 . . ? 
H10G C109 H10H 109.5 . . ? 
C106 C109 H10I 109.5 . . ? 
H10G C109 H10I 109.5 . . ? 
H10H C109 H10I 109.5 . . ? 
C2S C1S C6S 120.0 . . ? 
C2S C1S C7S 119.5 . . ? 
C6S C1S C7S 120.5 . . ? 
C1S C2S C3S 120.0 . . ? 
C1S C2S H2S 120.0 . . ? 
C3S C2S H2S 120.0 . . ? 
C2S C3S C4S 120.0 . . ? 
C2S C3S H3S 120.0 . . ? 
C4S C3S H3S 120.0 . . ? 
C5S C4S C3S 120.0 . . ? 
C5S C4S H4S 120.0 . . ? 
C3S C4S H4S 120.0 . . ? 
C4S C5S C6S 120.0 . . ? 
C4S C5S H5S 120.0 . . ? 
C6S C5S H5S 120.0 . . ? 
C5S C6S C1S 120.0 . . ? 
C5S C6S H6S 120.0 . . ? 
C1S C6S H6S 120.0 . . ? 
C1S C7S H7S1 109.5 . . ? 
C1S C7S H7S2 109.5 . . ? 
H7S1 C7S H7S2 109.5 . . ? 
C1S C7S H7S3 109.5 . . ? 
H7S1 C7S H7S3 109.5 . . ? 
H7S2 C7S H7S3 109.5 . . ? 
C26S C21S C22S 116.7(3) . . ? 
C26S C21S C27S 122.2(3) . . ? 
C22S C21S C27S 121.1(3) . . ? 
C23S C22S C21S 120.4(3) . . ? 
C23S C22S H22S 119.8 . . ? 
C21S C22S H22S 119.8 . . ? 
C24S C23S C22S 120.4(3) . . ? 
C24S C23S H23S 119.8 . . ? 
C22S C23S H23S 119.8 . . ? 
C23S C24S C25S 120.2(4) . . ? 
C23S C24S H24S 119.9 . . ? 
C25S C24S H24S 119.9 . . ? 
C26S C25S C24S 120.3(3) . . ? 
C26S C25S H25S 119.9 . . ? 
C24S C25S H25S 119.9 . . ? 
C25S C26S C21S 122.0(3) . . ? 
C25S C26S H26S 119.0 . . ? 
C21S C26S H26S 119.0 . . ? 
C21S C27S H27A 109.5 . . ? 
C21S C27S H27B 109.5 . . ? 
H27A C27S H27B 109.5 . . ? 
C21S C27S H27C 109.5 . . ? 
H27A C27S H27C 109.5 . . ? 
H27B C27S H27C 109.5 . . ? 
 
loop_ 
 _geom_torsion_atom_site_label_1 
 _geom_torsion_atom_site_label_2 
 _geom_torsion_atom_site_label_3 
 _geom_torsion_atom_site_label_4 
 _geom_torsion 
 _geom_torsion_site_symmetry_1 
 _geom_torsion_site_symmetry_2 
 _geom_torsion_site_symmetry_3 
 _geom_torsion_site_symmetry_4 
 _geom_torsion_publ_flag 
N1 Cu1 Cu2 N3 -21.58(7) . . . . ? 
N4 Cu1 Cu2 N3 153.63(9) . . . . ? 
Cu3 Cu1 Cu2 N3 -171.65(6) . . . . ? 
N1 Cu1 Cu2 C101 147.77(9) . . . . ? 
N4 Cu1 Cu2 C101 -37.01(10) . . . . ? 
Cu3 Cu1 Cu2 C101 -2.30(7) . . . . ? 
N1 Cu1 Cu2 Cu3 150.07(5) . . . . ? 
N4 Cu1 Cu2 Cu3 -34.71(7) . . . . ? 
N3 Cu2 Cu3 N6 24.64(15) . . . . ? 
C101 Cu2 Cu3 N6 -172.88(14) . . . . ? 
Cu1 Cu2 Cu3 N6 9.82(11) . . . . ? 
N3 Cu2 Cu3 C101 -162.48(13) . . . . ? 
Cu1 Cu2 Cu3 C101 -177.30(8) . . . . ? 
N3 Cu2 Cu3 Cu1 14.82(10) . . . . ? 
C101 Cu2 Cu3 Cu1 177.30(8) . . . . ? 
N1 Cu1 Cu3 N6 150.28(9) . . . . ? 
N4 Cu1 Cu3 N6 -22.12(8) . . . . ? 
Cu2 Cu1 Cu3 N6 -174.30(6) . . . . ? 
N1 Cu1 Cu3 C101 -33.07(10) . . . . ? 
N4 Cu1 Cu3 C101 154.53(9) . . . . ? 
Cu2 Cu1 Cu3 C101 2.35(7) . . . . ? 
N1 Cu1 Cu3 Cu2 -35.42(6) . . . . ? 
N4 Cu1 Cu3 Cu2 152.18(6) . . . . ? 
N4 Cu1 N1 N2 -144.35(19) . . . . ? 
Cu3 Cu1 N1 N2 54.68(19) . . . . ? 
Cu2 Cu1 N1 N2 25.96(17) . . . . ? 
N4 Cu1 N1 C1 26.5(3) . . . . ? 
Cu3 Cu1 N1 C1 -134.51(12) . . . . ? 
Cu2 Cu1 N1 C1 -163.23(14) . . . . ? 
C1 N1 N2 N3 175.71(17) . . . . ? 
Cu1 N1 N2 N3 -13.3(3) . . . . ? 
N1 N2 N3 C13 179.56(17) . . . . ? 
N1 N2 N3 Cu2 -19.7(2) . . . . ? 
C101 Cu2 N3 N2 -122.7(2) . . . . ? 
Cu3 Cu2 N3 N2 15.3(2) . . . . ? 
Cu1 Cu2 N3 N2 28.50(15) . . . . ? 
C101 Cu2 N3 C13 35.5(3) . . . . ? 
Cu3 Cu2 N3 C13 173.53(12) . . . . ? 
Cu1 Cu2 N3 C13 -173.26(16) . . . . ? 
N1 Cu1 N4 N5 -137.97(19) . . . . ? 
Cu3 Cu1 N4 N5 25.89(17) . . . . ? 
Cu2 Cu1 N4 N5 53.8(2) . . . . ? 
N1 Cu1 N4 C25 36.1(3) . . . . ? 
Cu3 Cu1 N4 C25 -160.08(16) . . . . ? 
Cu2 Cu1 N4 C25 -132.20(13) . . . . ? 
C25 N4 N5 N6 172.72(18) . . . . ? 
Cu1 N4 N5 N6 -12.9(3) . . . . ? 
N4 N5 N6 C37 177.93(19) . . . . ? 
N4 N5 N6 Cu3 -20.9(3) . . . . ? 
C101 Cu3 N6 N5 -139.9(3) . . . . ? 
Cu2 Cu3 N6 N5 21.1(3) . . . . ? 
Cu1 Cu3 N6 N5 30.00(18) . . . . ? 
C101 Cu3 N6 C37 20.1(4) . . . . ? 
Cu2 Cu3 N6 C37 -178.82(13) . . . . ? 
Cu1 Cu3 N6 C37 -169.94(18) . . . . ? 
N2 N1 C1 C2 -94.8(2) . . . . ? 
Cu1 N1 C1 C2 92.5(2) . . . . ? 
N2 N1 C1 C6 89.9(2) . . . . ? 
Cu1 N1 C1 C6 -82.8(2) . . . . ? 
C6 C1 C2 C3 0.6(3) . . . . ? 
N1 C1 C2 C3 -174.59(19) . . . . ? 
C6 C1 C2 C10 179.1(2) . . . . ? 
N1 C1 C2 C10 4.0(3) . . . . ? 
C1 C2 C3 C4 -0.2(3) . . . . ? 
C10 C2 C3 C4 -178.8(2) . . . . ? 
C2 C3 C4 C5 -0.8(4) . . . . ? 
C3 C4 C5 C6 1.4(4) . . . . ? 
C4 C5 C6 C1 -1.1(3) . . . . ? 
C4 C5 C6 C7 179.4(2) . . . . ? 
C2 C1 C6 C5 0.1(3) . . . . ? 
N1 C1 C6 C5 175.2(2) . . . . ? 
C2 C1 C6 C7 179.6(2) . . . . ? 
N1 C1 C6 C7 -5.3(3) . . . . ? 
C5 C6 C7 C9 75.4(3) . . . . ? 
C1 C6 C7 C9 -104.1(3) . . . . ? 
C5 C6 C7 C8 -50.3(3) . . . . ? 
C1 C6 C7 C8 130.1(2) . . . . ? 
C3 C2 C10 C11 75.7(3) . . . . ? 
C1 C2 C10 C11 -102.8(3) . . . . ? 
C3 C2 C10 C12 -48.6(3) . . . . ? 
C1 C2 C10 C12 132.9(2) . . . . ? 
N2 N3 C13 C18 94.8(2) . . . . ? 
Cu2 N3 C13 C18 -65.5(2) . . . . ? 
N2 N3 C13 C14 -85.6(2) . . . . ? 
Cu2 N3 C13 C14 114.0(2) . . . . ? 
C18 C13 C14 C15 -3.8(3) . . . . ? 
N3 C13 C14 C15 176.7(2) . . . . ? 
C18 C13 C14 C22 174.1(2) . . . . ? 
N3 C13 C14 C22 -5.4(3) . . . . ? 
C13 C14 C15 C16 2.3(4) . . . . ? 
C22 C14 C15 C16 -175.6(3) . . . . ? 
C14 C15 C16 C17 0.3(4) . . . . ? 
C15 C16 C17 C18 -1.7(4) . . . . ? 
C16 C17 C18 C13 0.3(4) . . . . ? 
C16 C17 C18 C19 -176.3(3) . . . . ? 
C14 C13 C18 C17 2.5(3) . . . . ? 
N3 C13 C18 C17 -177.9(2) . . . . ? 
C14 C13 C18 C19 179.1(2) . . . . ? 
N3 C13 C18 C19 -1.4(3) . . . . ? 
C17 C18 C19 C21 -45.8(3) . . . . ? 
C13 C18 C19 C21 137.8(2) . . . . ? 
C17 C18 C19 C20 80.2(3) . . . . ? 
C13 C18 C19 C20 -96.3(3) . . . . ? 
C15 C14 C22 C23 91.5(3) . . . . ? 
C13 C14 C22 C23 -86.4(3) . . . . ? 
C15 C14 C22 C24 -31.8(3) . . . . ? 
C13 C14 C22 C24 150.3(2) . . . . ? 
N5 N4 C25 C30 -106.8(2) . . . . ? 
Cu1 N4 C25 C30 78.2(2) . . . . ? 
N5 N4 C25 C26 75.1(2) . . . . ? 
Cu1 N4 C25 C26 -99.9(2) . . . . ? 
C30 C25 C26 C27 -0.6(3) . . . . ? 
N4 C25 C26 C27 177.41(19) . . . . ? 
C30 C25 C26 C34 -179.5(2) . . . . ? 
N4 C25 C26 C34 -1.5(3) . . . . ? 
C25 C26 C27 C28 -0.7(3) . . . . ? 
C34 C26 C27 C28 178.2(2) . . . . ? 
C26 C27 C28 C29 0.9(4) . . . . ? 
C27 C28 C29 C30 0.2(4) . . . . ? 
C28 C29 C30 C25 -1.5(3) . . . . ? 
C28 C29 C30 C31 178.2(2) . . . . ? 
C26 C25 C30 C29 1.6(3) . . . . ? 
N4 C25 C30 C29 -176.40(19) . . . . ? 
C26 C25 C30 C31 -178.1(2) . . . . ? 
N4 C25 C30 C31 3.9(3) . . . . ? 
C29 C30 C31 C32 65.5(3) . . . . ? 
C25 C30 C31 C32 -114.8(3) . . . . ? 
C29 C30 C31 C33 -57.4(3) . . . . ? 
C25 C30 C31 C33 122.3(3) . . . . ? 
C27 C26 C34 C35 -100.3(3) . . . . ? 
C25 C26 C34 C35 78.6(3) . . . . ? 
C27 C26 C34 C36 23.0(3) . . . . ? 
C25 C26 C34 C36 -158.1(2) . . . . ? 
N5 N6 C37 C38 -102.2(3) . . . . ? 
Cu3 N6 C37 C38 95.3(2) . . . . ? 
N5 N6 C37 C42 80.6(3) . . . . ? 
Cu3 N6 C37 C42 -81.8(2) . . . . ? 
C42 C37 C38 C39 -1.7(4) . . . . ? 
N6 C37 C38 C39 -178.8(2) . . . . ? 
C42 C37 C38 C46 -179.3(3) . . . . ? 
N6 C37 C38 C46 3.6(4) . . . . ? 
C37 C38 C39 C40 0.2(5) . . . . ? 
C46 C38 C39 C40 177.8(3) . . . . ? 
C38 C39 C40 C41 0.9(5) . . . . ? 
C39 C40 C41 C42 -0.4(5) . . . . ? 
C40 C41 C42 C37 -1.1(4) . . . . ? 
C40 C41 C42 C43 178.1(3) . . . . ? 
C38 C37 C42 C41 2.2(4) . . . . ? 
N6 C37 C42 C41 179.2(2) . . . . ? 
C38 C37 C42 C43 -177.0(2) . . . . ? 
N6 C37 C42 C43 0.0(3) . . . . ? 
C41 C42 C43 C44 68.0(3) . . . . ? 
C37 C42 C43 C44 -112.9(3) . . . . ? 
C41 C42 C43 C45 -56.8(3) . . . . ? 
C37 C42 C43 C45 122.3(3) . . . . ? 
C39 C38 C46 C48 -77.6(4) . . . . ? 
C37 C38 C46 C48 99.9(3) . . . . ? 
C39 C38 C46 C47 46.8(4) . . . . ? 
C37 C38 C46 C47 -135.7(3) . . . . ? 
N6 Cu3 C101 C102 60.3(4) . . . . ? 
Cu2 Cu3 C101 C102 -106.01(18) . . . . ? 
Cu1 Cu3 C101 C102 -108.69(16) . . . . ? 
N6 Cu3 C101 C106 -83.6(3) . . . . ? 
Cu2 Cu3 C101 C106 110.11(17) . . . . ? 
Cu1 Cu3 C101 C106 107.43(14) . . . . ? 
N6 Cu3 C101 Cu2 166.3(3) . . . . ? 
Cu1 Cu3 C101 Cu2 -2.68(8) . . . . ? 
N3 Cu2 C101 C102 -92.5(3) . . . . ? 
Cu3 Cu2 C101 C102 116.42(18) . . . . ? 
Cu1 Cu2 C101 C102 119.04(15) . . . . ? 
N3 Cu2 C101 C106 42.1(3) . . . . ? 
Cu3 Cu2 C101 C106 -109.00(18) . . . . ? 
Cu1 Cu2 C101 C106 -106.38(16) . . . . ? 
N3 Cu2 C101 Cu3 151.1(2) . . . . ? 
Cu1 Cu2 C101 Cu3 2.62(8) . . . . ? 
C106 C101 C102 C103 -1.8(3) . . . . ? 
Cu3 C101 C102 C103 -143.8(2) . . . . ? 
Cu2 C101 C102 C103 130.5(2) . . . . ? 
C106 C101 C102 C107 178.6(2) . . . . ? 
Cu3 C101 C102 C107 36.7(3) . . . . ? 
Cu2 C101 C102 C107 -49.0(3) . . . . ? 
C101 C102 C103 C104 0.2(4) . . . . ? 
C107 C102 C103 C104 179.8(2) . . . . ? 
C102 C103 C104 C105 1.5(4) . . . . ? 
C102 C103 C104 C108 -178.4(3) . . . . ? 
C103 C104 C105 C106 -1.6(4) . . . . ? 
C108 C104 C105 C106 178.3(3) . . . . ? 
C104 C105 C106 C101 0.0(4) . . . . ? 
C104 C105 C106 C109 178.9(2) . . . . ? 
C102 C101 C106 C105 1.7(3) . . . . ? 
Cu3 C101 C106 C105 146.05(19) . . . . ? 
Cu2 C101 C106 C105 -129.2(2) . . . . ? 
C102 C101 C106 C109 -177.1(2) . . . . ? 
Cu3 C101 C106 C109 -32.8(3) . . . . ? 
Cu2 C101 C106 C109 51.9(3) . . . . ? 
C6S C1S C2S C3S 0.0 . . . . ? 
C7S C1S C2S C3S 178.3 . . . . ? 
C1S C2S C3S C4S 0.0 . . . . ? 
C2S C3S C4S C5S 0.0 . . . . ? 
C3S C4S C5S C6S 0.0 . . . . ? 
C4S C5S C6S C1S 0.0 . . . . ? 
C2S C1S C6S C5S 0.0 . . . . ? 
C7S C1S C6S C5S -178.3 . . . . ? 
C26S C21S C22S C23S 1.4(4) . . . . ? 
C27S C21S C22S C23S -178.0(3) . . . . ? 
C21S C22S C23S C24S -0.4(5) . . . . ? 
C22S C23S C24S C25S -0.9(5) . . . . ? 
C23S C24S C25S C26S 1.1(5) . . . . ? 
C24S C25S C26S C21S -0.1(5) . . . . ? 
C22S C21S C26S C25S -1.1(4) . . . . ? 
C27S C21S C26S C25S 178.3(3) . . . . ? 
 
_diffrn_measured_fraction_theta_max    0.958 
_diffrn_reflns_theta_full              27.56 
_diffrn_measured_fraction_theta_full   0.958 
_refine_diff_density_max    0.784 
_refine_diff_density_min   -0.500 
_refine_diff_density_rms    0.060 


#===END
 
data_Cu3L2Mes 
 
_audit_creation_method            SHELXL-97 
_chemical_name_systematic 
; 
 ? 
; 
_chemical_name_common             ? 
_chemical_melting_point           ? 
_chemical_formula_moiety          ? 
_chemical_formula_sum 
 'C57 H79 Cu3 N6' 
_chemical_formula_weight          1038.88 
 
loop_ 
 _atom_type_symbol 
 _atom_type_description 
 _atom_type_scat_dispersion_real 
 _atom_type_scat_dispersion_imag 
 _atom_type_scat_source 
 'C'  'C'   0.0033   0.0016 
 'International Tables Vol C Tables 4.2.6.8 and 6.1.1.4' 
 'H'  'H'   0.0000   0.0000 
 'International Tables Vol C Tables 4.2.6.8 and 6.1.1.4' 
 'N'  'N'   0.0061   0.0033 
 'International Tables Vol C Tables 4.2.6.8 and 6.1.1.4' 
 'Cu'  'Cu'   0.3201   1.2651 
 'International Tables Vol C Tables 4.2.6.8 and 6.1.1.4' 
 
_symmetry_cell_setting            Triclinic 
_symmetry_space_group_name_H-M    P-1 
 
loop_ 
 _symmetry_equiv_pos_as_xyz 
 'x, y, z' 
 '-x, -y, -z' 
 
_cell_length_a                    11.9480(3) 
_cell_length_b                    15.3420(4) 
_cell_length_c                    15.5620(4) 
_cell_angle_alpha                 93.0140(10) 
_cell_angle_beta                  99.3270(10) 
_cell_angle_gamma                 92.364(2) 
_cell_volume                      2807.42(12) 
_cell_formula_units_Z             2 
_cell_measurement_temperature     150(2) 
_cell_measurement_reflns_used     53616 
_cell_measurement_theta_min       8.52 
_cell_measurement_theta_max       27.56 
 
_exptl_crystal_description        Block 
_exptl_crystal_colour             Colorless 
_exptl_crystal_size_max           0.25 
_exptl_crystal_size_mid           0.25 
_exptl_crystal_size_min           0.13 
_exptl_crystal_density_meas       ? 
_exptl_crystal_density_diffrn     1.229 
_exptl_crystal_density_method     'not measured' 
_exptl_crystal_F_000              1100 
_exptl_absorpt_coefficient_mu     1.166 
_exptl_absorpt_correction_type    Multi-scan 
_exptl_absorpt_correction_T_min   0.7593 
_exptl_absorpt_correction_T_max   0.8680 
_exptl_absorpt_process_details    'SORTAV (Blessing, 1995)' 
 
_exptl_special_details 
; 
 ? 
; 
 
_diffrn_ambient_temperature       150(2) 
_diffrn_radiation_wavelength      0.71073 
_diffrn_radiation_type            MoK\a 
_diffrn_radiation_source          'fine-focus sealed tube' 
_diffrn_radiation_monochromator   graphite 
_diffrn_measurement_device_type   'Bruker Kappa CCD Diffractometer'
_diffrn_measurement_method        'omega and phi scans'
_diffrn_detector_area_resol_mean  ?
_diffrn_standards_number          0
_diffrn_standards_interval_count  0
_diffrn_standards_interval_time   0
_diffrn_standards_decay_%         0
_diffrn_reflns_number             53616 
_diffrn_reflns_av_R_equivalents   0.0692 
_diffrn_reflns_av_sigmaI/netI     0.0672 
_diffrn_reflns_limit_h_min        -15 
_diffrn_reflns_limit_h_max        15 
_diffrn_reflns_limit_k_min        -19 
_diffrn_reflns_limit_k_max        19 
_diffrn_reflns_limit_l_min        -20 
_diffrn_reflns_limit_l_max        20 
_diffrn_reflns_theta_min          8.52 
_diffrn_reflns_theta_max          27.56 
_reflns_number_total              12403 
_reflns_number_gt                 8645 
_reflns_threshold_expression      >2sigma(I) 
 
_computing_data_collection        'Kappa CCD'
_computing_cell_refinement        
                    'HKL Scalepack (Otwinowski & Minor 1997)'
_computing_data_reduction         
              'Denzo and Scalepak (Otwinowski & Minor, 1997)'
_computing_structure_solution     'SHELXS-86 (Sheldrick, 1986)'
_computing_structure_refinement   'SHELXL-97 (Sheldrick, 1997)'
_computing_molecular_graphics     'ORTEP 3 for Windows (Farrugia, 1997)'
_computing_publication_material   'SHELXL-97 (Sheldrick, 1997)'
 
_refine_special_details 
; 
 Refinement of F^2^ against ALL reflections.  The weighted R-factor wR and 
 goodness of fit S are based on F^2^, conventional R-factors R are based 
 on F, with F set to zero for negative F^2^. The threshold expression of 
 F^2^ > 2sigma(F^2^) is used only for calculating R-factors(gt) etc. and is 
 not relevant to the choice of reflections for refinement.  R-factors based 
 on F^2^ are statistically about twice as large as those based on F, and R- 
 factors based on ALL data will be even larger. 
; 
 
_refine_ls_structure_factor_coef  Fsqd  
_refine_ls_matrix_type            full 
_refine_ls_weighting_scheme       calc  
_refine_ls_weighting_details 
 'calc w=1/[\s^2^(Fo^2^)+(0.0469P)^2^+1.5379P] where P=(Fo^2^+2Fc^2^)/3' 
_atom_sites_solution_primary      direct 
_atom_sites_solution_secondary    difmap 
_atom_sites_solution_hydrogens    geom 
_refine_ls_hydrogen_treatment     Constr 
_refine_ls_extinction_method      none 
_refine_ls_extinction_coef        ? 
_refine_ls_number_reflns          12403 
_refine_ls_number_parameters      614 
_refine_ls_number_restraints      0 
_refine_ls_R_factor_all           0.0812 
_refine_ls_R_factor_gt            0.0442 
_refine_ls_wR_factor_ref          0.1106 
_refine_ls_wR_factor_gt           0.0943 
_refine_ls_goodness_of_fit_ref    1.026 
_refine_ls_restrained_S_all       1.026 
_refine_ls_shift/su_max           0.001 
_refine_ls_shift/su_mean          0.000 
 
loop_ 
 _atom_site_label 
 _atom_site_type_symbol 
 _atom_site_fract_x 
 _atom_site_fract_y 
 _atom_site_fract_z 
 _atom_site_U_iso_or_equiv 
 _atom_site_adp_type 
 _atom_site_occupancy 
 _atom_site_symmetry_multiplicity 
 _atom_site_calc_flag 
 _atom_site_refinement_flags 
 _atom_site_disorder_assembly 
 _atom_site_disorder_group 
Cu2 Cu 0.21855(3) 0.22567(2) 0.87776(2) 0.02539(9) Uani 1 1 d . . . 
Cu3 Cu 0.17235(3) 0.35534(2) 0.799252(19) 0.02467(9) Uani 1 1 d . . . 
Cu1 Cu 0.28639(2) 0.23102(2) 0.72134(2) 0.02415(9) Uani 1 1 d . . . 
N4 N 0.21606(17) 0.28696(13) 0.62347(13) 0.0234(4) Uani 1 1 d . . . 
N5 N 0.17139(17) 0.36318(14) 0.61561(14) 0.0246(5) Uani 1 1 d . . . 
N2 N 0.37158(18) 0.10048(14) 0.84000(14) 0.0257(5) Uani 1 1 d . . . 
C106 C 0.0495(3) 0.31857(19) 0.94030(19) 0.0358(7) Uani 1 1 d . . . 
N3 N 0.28414(17) 0.11621(13) 0.87724(13) 0.0239(4) Uani 1 1 d . . . 
N1 N 0.38734(18) 0.15329(14) 0.78001(14) 0.0257(5) Uani 1 1 d . . . 
N6 N 0.15797(18) 0.40334(14) 0.68864(14) 0.0252(5) Uani 1 1 d . . . 
C101 C 0.1606(2) 0.33387(17) 0.92167(17) 0.0270(6) Uani 1 1 d . . . 
C13 C 0.2677(2) 0.05579(17) 0.94272(17) 0.0257(5) Uani 1 1 d . . . 
C25 C 0.2152(2) 0.24244(16) 0.53914(16) 0.0249(5) Uani 1 1 d . . . 
C1 C 0.4917(2) 0.13976(18) 0.74772(17) 0.0284(6) Uani 1 1 d . . . 
C30 C 0.1202(2) 0.18782(17) 0.50372(17) 0.0275(6) Uani 1 1 d . . . 
C2 C 0.5792(2) 0.2049(2) 0.76973(19) 0.0355(7) Uani 1 1 d . . . 
C26 C 0.3110(2) 0.25108(18) 0.49757(18) 0.0320(6) Uani 1 1 d . . . 
C42 C 0.1728(3) 0.56175(18) 0.71208(18) 0.0342(6) Uani 1 1 d . . . 
C18 C 0.1924(2) -0.01749(18) 0.91926(18) 0.0312(6) Uani 1 1 d . . . 
C108 C 0.0473(5) 0.4689(3) 1.1422(3) 0.0761(13) Uani 1 1 d . . . 
H10A H 0.0377 0.4277 1.1868 0.114 Uiso 1 1 calc R . . 
H10B H -0.0256 0.4942 1.1218 0.114 Uiso 1 1 calc R . . 
H10C H 0.1033 0.5156 1.1673 0.114 Uiso 1 1 calc R . . 
C38 C -0.0038(2) 0.49122(18) 0.62900(17) 0.0302(6) Uani 1 1 d . . . 
C29 C 0.1219(2) 0.14250(19) 0.42442(18) 0.0338(6) Uani 1 1 d . . . 
H29 H 0.0592 0.1041 0.3997 0.041 Uiso 1 1 calc R . . 
C37 C 0.1081(2) 0.48690(16) 0.67557(16) 0.0259(5) Uani 1 1 d . . . 
C47 C -0.1099(3) 0.3572(2) 0.6663(2) 0.0402(7) Uani 1 1 d . . . 
H47A H -0.0419 0.3439 0.7068 0.060 Uiso 1 1 calc R . . 
H47B H -0.1508 0.3026 0.6416 0.060 Uiso 1 1 calc R . . 
H47C H -0.1593 0.3918 0.6976 0.060 Uiso 1 1 calc R . . 
C34 C 0.0213(2) 0.17578(19) 0.55283(18) 0.0321(6) Uani 1 1 d . . . 
H34 H 0.0207 0.2296 0.5918 0.039 Uiso 1 1 calc R . . 
C14 C 0.3236(2) 0.07406(18) 1.02837(18) 0.0305(6) Uani 1 1 d . . . 
C102 C 0.2358(3) 0.39240(18) 0.97981(18) 0.0339(6) Uani 1 1 d . . . 
C27 C 0.3065(3) 0.2061(2) 0.4168(2) 0.0405(7) Uani 1 1 d . . . 
H27 H 0.3686 0.2127 0.3861 0.049 Uiso 1 1 calc R . . 
C19 C 0.1287(3) -0.03481(19) 0.8267(2) 0.0366(7) Uani 1 1 d . . . 
H19 H 0.1585 0.0094 0.7899 0.044 Uiso 1 1 calc R . . 
C46 C -0.0752(2) 0.40908(19) 0.59297(18) 0.0322(6) Uani 1 1 d . . . 
H46 H -0.0266 0.3714 0.5616 0.039 Uiso 1 1 calc R . . 
C6 C 0.5030(3) 0.0650(2) 0.6943(2) 0.0383(7) Uani 1 1 d . . . 
C39 C -0.0466(3) 0.5739(2) 0.6202(2) 0.0390(7) Uani 1 1 d . . . 
H39 H -0.1209 0.5791 0.5887 0.047 Uiso 1 1 calc R . . 
C103 C 0.1975(3) 0.4351(2) 1.0492(2) 0.0441(8) Uani 1 1 d . . . 
H103 H 0.2481 0.4753 1.0866 0.053 Uiso 1 1 calc R . . 
C105 C 0.0164(3) 0.3619(2) 1.0123(2) 0.0449(8) Uani 1 1 d . . . 
H105 H -0.0579 0.3501 1.0246 0.054 Uiso 1 1 calc R . . 
C15 C 0.3038(3) 0.0144(2) 1.0905(2) 0.0381(7) Uani 1 1 d . . . 
H15 H 0.3411 0.0246 1.1492 0.046 Uiso 1 1 calc R . . 
C31 C 0.4152(3) 0.3070(2) 0.5392(2) 0.0423(7) Uani 1 1 d . . . 
H31 H 0.4126 0.3126 0.6032 0.051 Uiso 1 1 calc R . . 
C16 C 0.2320(3) -0.0579(2) 1.0683(2) 0.0412(7) Uani 1 1 d . . . 
H16 H 0.2207 -0.0976 1.1113 0.049 Uiso 1 1 calc R . . 
C7 C 0.4041(3) 0.0004(2) 0.6633(3) 0.0537(9) Uani 1 1 d . . . 
H7 H 0.3478 0.0072 0.7039 0.064 Uiso 1 1 calc R . . 
C11 C 0.6378(6) 0.2880(4) 0.9142(3) 0.105(2) Uani 1 1 d . . . 
H11A H 0.7179 0.2916 0.9073 0.158 Uiso 1 1 calc R . . 
H11B H 0.6219 0.2346 0.9429 0.158 Uiso 1 1 calc R . . 
H11C H 0.6214 0.3390 0.9498 0.158 Uiso 1 1 calc R . . 
C40 C 0.0157(3) 0.6484(2) 0.6560(2) 0.0456(8) Uani 1 1 d . . . 
H40 H -0.0160 0.7039 0.6492 0.055 Uiso 1 1 calc R . . 
C104 C 0.0883(3) 0.4212(2) 1.0660(2) 0.0495(9) Uani 1 1 d . . . 
C43 C 0.2939(3) 0.5578(2) 0.7594(2) 0.0430(7) Uani 1 1 d . . . 
H43 H 0.3079 0.4953 0.7707 0.052 Uiso 1 1 calc R . . 
C28 C 0.2137(3) 0.1524(2) 0.38058(19) 0.0395(7) Uani 1 1 d . . . 
H28 H 0.2126 0.1221 0.3256 0.047 Uiso 1 1 calc R . . 
C17 C 0.1762(3) -0.0734(2) 0.9841(2) 0.0400(7) Uani 1 1 d . . . 
H17 H 0.1255 -0.1233 0.9699 0.048 Uiso 1 1 calc R . . 
C22 C 0.4034(3) 0.1534(2) 1.05484(19) 0.0376(7) Uani 1 1 d . . . 
H22 H 0.3983 0.1906 1.0036 0.045 Uiso 1 1 calc R . . 
C33 C 0.5253(3) 0.2663(3) 0.5295(2) 0.0508(8) Uani 1 1 d . . . 
H33A H 0.5341 0.2634 0.4679 0.076 Uiso 1 1 calc R . . 
H33B H 0.5248 0.2072 0.5505 0.076 Uiso 1 1 calc R . . 
H33C H 0.5887 0.3019 0.5638 0.076 Uiso 1 1 calc R . . 
C4 C 0.6947(3) 0.1178(3) 0.6890(2) 0.0537(10) Uani 1 1 d . . . 
H4 H 0.7651 0.1094 0.6697 0.064 Uiso 1 1 calc R . . 
C35 C -0.0944(3) 0.1658(2) 0.4932(2) 0.0448(8) Uani 1 1 d . . . 
H35A H -0.1037 0.2156 0.4561 0.067 Uiso 1 1 calc R . . 
H35B H -0.1549 0.1639 0.5288 0.067 Uiso 1 1 calc R . . 
H35C H -0.0987 0.1115 0.4564 0.067 Uiso 1 1 calc R . . 
C10 C 0.5648(3) 0.2861(2) 0.8265(2) 0.0430(7) Uani 1 1 d . . . 
H10 H 0.4840 0.2843 0.8362 0.052 Uiso 1 1 calc R . . 
C44 C 0.3779(4) 0.5892(5) 0.7023(3) 0.0938(17) Uani 1 1 d . . . 
H44A H 0.3709 0.5502 0.6496 0.141 Uiso 1 1 calc R . . 
H44B H 0.4553 0.5889 0.7348 0.141 Uiso 1 1 calc R . . 
H44C H 0.3614 0.6487 0.6859 0.141 Uiso 1 1 calc R . . 
C36 C 0.0385(3) 0.0991(2) 0.6112(2) 0.0495(8) Uani 1 1 d . . . 
H36A H 0.0426 0.0453 0.5752 0.074 Uiso 1 1 calc R . . 
H36B H -0.0254 0.0931 0.6431 0.074 Uiso 1 1 calc R . . 
H36C H 0.1093 0.1096 0.6527 0.074 Uiso 1 1 calc R . . 
C41 C 0.1234(3) 0.64277(19) 0.7015(2) 0.0442(8) Uani 1 1 d . . . 
H41 H 0.1652 0.6946 0.7263 0.053 Uiso 1 1 calc R . . 
C5 C 0.6076(3) 0.0554(3) 0.6668(2) 0.0507(9) Uani 1 1 d . . . 
H5A H 0.6188 0.0047 0.6321 0.061 Uiso 1 1 calc R . . 
C23 C 0.3700(4) 0.2081(2) 1.1301(2) 0.0571(9) Uani 1 1 d . . . 
H23A H 0.2920 0.2261 1.1137 0.086 Uiso 1 1 calc R . . 
H23B H 0.4217 0.2600 1.1435 0.086 Uiso 1 1 calc R . . 
H23C H 0.3747 0.1734 1.1815 0.086 Uiso 1 1 calc R . . 
C24 C 0.5259(3) 0.1255(3) 1.0757(3) 0.0615(10) Uani 1 1 d . . . 
H24A H 0.5324 0.0857 1.1233 0.092 Uiso 1 1 calc R . . 
H24B H 0.5769 0.1773 1.0933 0.092 Uiso 1 1 calc R . . 
H24C H 0.5469 0.0957 1.0237 0.092 Uiso 1 1 calc R . . 
C107 C 0.3584(3) 0.4072(2) 0.9686(2) 0.0448(8) Uani 1 1 d . . . 
H10D H 0.3841 0.4676 0.9877 0.067 Uiso 1 1 calc R . . 
H10E H 0.3650 0.3965 0.9071 0.067 Uiso 1 1 calc R . . 
H10F H 0.4055 0.3671 1.0039 0.067 Uiso 1 1 calc R . . 
C109 C -0.0331(3) 0.2543(3) 0.8843(2) 0.0494(8) Uani 1 1 d . . . 
H10G H -0.0443 0.2024 0.9167 0.074 Uiso 1 1 calc R . . 
H10H H -0.0030 0.2372 0.8312 0.074 Uiso 1 1 calc R . . 
H10I H -0.1059 0.2813 0.8684 0.074 Uiso 1 1 calc R . . 
C48 C -0.1815(3) 0.4255(2) 0.5278(2) 0.0434(7) Uani 1 1 d . . . 
H48A H -0.2354 0.4564 0.5581 0.065 Uiso 1 1 calc R . . 
H48B H -0.2170 0.3695 0.5016 0.065 Uiso 1 1 calc R . . 
H48C H -0.1604 0.4612 0.4819 0.065 Uiso 1 1 calc R . . 
C21 C 0.1502(4) -0.1247(3) 0.7886(3) 0.0672(11) Uani 1 1 d . . . 
H21A H 0.2321 -0.1307 0.7919 0.101 Uiso 1 1 calc R . . 
H21B H 0.1131 -0.1316 0.7276 0.101 Uiso 1 1 calc R . . 
H21C H 0.1192 -0.1697 0.8219 0.101 Uiso 1 1 calc R . . 
C3 C 0.6813(3) 0.1922(3) 0.7387(2) 0.0471(8) Uani 1 1 d . . . 
H3 H 0.7419 0.2353 0.7522 0.057 Uiso 1 1 calc R . . 
C20 C 0.0034(3) -0.0220(3) 0.8226(3) 0.0672(11) Uani 1 1 d . . . 
H20A H -0.0284 -0.0641 0.8585 0.101 Uiso 1 1 calc R . . 
H20B H -0.0352 -0.0310 0.7621 0.101 Uiso 1 1 calc R . . 
H20C H -0.0075 0.0376 0.8447 0.101 Uiso 1 1 calc R . . 
C8 C 0.3471(5) 0.0201(4) 0.5738(5) 0.114(2) Uani 1 1 d . . . 
H8A H 0.3298 0.0819 0.5733 0.172 Uiso 1 1 calc R . . 
H8B H 0.2766 -0.0162 0.5579 0.172 Uiso 1 1 calc R . . 
H8C H 0.3978 0.0073 0.5316 0.172 Uiso 1 1 calc R . . 
C12 C 0.5852(8) 0.3690(3) 0.7843(4) 0.128(3) Uani 1 1 d . . . 
H12A H 0.5663 0.4186 0.8207 0.192 Uiso 1 1 calc R . . 
H12B H 0.5374 0.3677 0.7267 0.192 Uiso 1 1 calc R . . 
H12C H 0.6653 0.3753 0.7778 0.192 Uiso 1 1 calc R . . 
C9 C 0.4355(6) -0.0946(3) 0.6604(4) 0.0997(19) Uani 1 1 d . . . 
H9A H 0.4778 -0.1057 0.6123 0.150 Uiso 1 1 calc R . . 
H9B H 0.3662 -0.1327 0.6514 0.150 Uiso 1 1 calc R . . 
H9C H 0.4828 -0.1066 0.7156 0.150 Uiso 1 1 calc R . . 
C45 C 0.3138(4) 0.6101(3) 0.8469(3) 0.0741(12) Uani 1 1 d . . . 
H45A H 0.3002 0.6717 0.8376 0.111 Uiso 1 1 calc R . . 
H45B H 0.3923 0.6048 0.8756 0.111 Uiso 1 1 calc R . . 
H45C H 0.2617 0.5874 0.8840 0.111 Uiso 1 1 calc R . . 
C32 C 0.4110(4) 0.3969(3) 0.5081(5) 0.0961(18) Uani 1 1 d . . . 
H32A H 0.4120 0.3945 0.4452 0.144 Uiso 1 1 calc R . . 
H32B H 0.4770 0.4325 0.5385 0.144 Uiso 1 1 calc R . . 
H32C H 0.3413 0.4231 0.5201 0.144 Uiso 1 1 calc R . . 
 
loop_ 
 _atom_site_aniso_label 
 _atom_site_aniso_U_11 
 _atom_site_aniso_U_22 
 _atom_site_aniso_U_33 
 _atom_site_aniso_U_23 
 _atom_site_aniso_U_13 
 _atom_site_aniso_U_12 
Cu2 0.02849(17) 0.02337(17) 0.02595(17) 0.00355(13) 0.00700(13) 0.00811(12) 
Cu3 0.02877(17) 0.02358(17) 0.02265(17) 0.00316(12) 0.00521(12) 0.00688(12) 
Cu1 0.02504(17) 0.02377(17) 0.02430(17) 0.00421(12) 0.00379(12) 0.00684(12) 
N4 0.0251(11) 0.0215(11) 0.0237(11) -0.0004(9) 0.0039(8) 0.0038(8) 
N5 0.0255(11) 0.0226(11) 0.0260(11) 0.0031(9) 0.0046(9) 0.0027(9) 
N2 0.0265(11) 0.0245(11) 0.0277(11) 0.0035(9) 0.0068(9) 0.0066(9) 
C106 0.0402(16) 0.0374(16) 0.0339(16) 0.0111(13) 0.0127(13) 0.0146(13) 
N3 0.0237(11) 0.0234(11) 0.0252(11) 0.0030(9) 0.0045(9) 0.0047(8) 
N1 0.0269(11) 0.0278(12) 0.0236(11) 0.0049(9) 0.0055(9) 0.0060(9) 
N6 0.0282(11) 0.0236(11) 0.0244(11) 0.0022(9) 0.0041(9) 0.0060(9) 
C101 0.0310(14) 0.0270(14) 0.0245(13) 0.0049(11) 0.0064(11) 0.0093(11) 
C13 0.0258(13) 0.0268(14) 0.0263(13) 0.0068(11) 0.0059(10) 0.0102(11) 
C25 0.0280(13) 0.0233(13) 0.0240(13) 0.0028(10) 0.0040(10) 0.0074(10) 
C1 0.0274(14) 0.0363(15) 0.0239(13) 0.0105(11) 0.0057(10) 0.0119(11) 
C30 0.0293(14) 0.0252(13) 0.0277(14) 0.0021(11) 0.0020(11) 0.0075(11) 
C2 0.0267(14) 0.0485(18) 0.0322(15) 0.0105(13) 0.0033(11) 0.0078(13) 
C26 0.0336(15) 0.0326(15) 0.0319(15) 0.0035(12) 0.0095(12) 0.0063(12) 
C42 0.0473(17) 0.0270(15) 0.0289(14) 0.0030(12) 0.0068(12) 0.0067(12) 
C18 0.0341(15) 0.0271(14) 0.0338(15) 0.0064(12) 0.0069(12) 0.0053(11) 
C108 0.126(4) 0.063(3) 0.051(2) -0.0050(19) 0.046(2) 0.030(2) 
C38 0.0372(15) 0.0301(14) 0.0267(14) 0.0090(11) 0.0111(11) 0.0110(12) 
C29 0.0351(15) 0.0316(15) 0.0319(15) -0.0055(12) -0.0013(12) 0.0053(12) 
C37 0.0361(14) 0.0200(13) 0.0237(13) 0.0053(10) 0.0080(11) 0.0087(11) 
C47 0.0410(17) 0.0431(18) 0.0376(17) 0.0109(14) 0.0073(13) 0.0011(13) 
C34 0.0299(14) 0.0328(15) 0.0334(15) -0.0004(12) 0.0058(11) -0.0011(11) 
C14 0.0312(14) 0.0310(15) 0.0300(14) 0.0027(12) 0.0053(11) 0.0069(11) 
C102 0.0458(17) 0.0288(15) 0.0268(14) 0.0029(12) 0.0035(12) 0.0080(12) 
C27 0.0403(17) 0.0474(18) 0.0367(17) 0.0003(14) 0.0152(13) 0.0067(14) 
C19 0.0397(16) 0.0308(15) 0.0365(16) 0.0015(12) -0.0003(13) -0.0042(12) 
C46 0.0319(14) 0.0355(15) 0.0309(15) 0.0075(12) 0.0070(11) 0.0088(12) 
C6 0.0450(17) 0.0392(17) 0.0354(16) 0.0078(13) 0.0150(13) 0.0170(14) 
C39 0.0429(17) 0.0378(17) 0.0401(17) 0.0132(14) 0.0110(13) 0.0181(14) 
C103 0.069(2) 0.0348(17) 0.0273(15) -0.0043(13) 0.0072(15) 0.0059(15) 
C105 0.0494(19) 0.0497(19) 0.0438(18) 0.0107(16) 0.0262(15) 0.0163(16) 
C15 0.0416(17) 0.0420(17) 0.0316(15) 0.0090(13) 0.0047(13) 0.0096(14) 
C31 0.0363(16) 0.0438(18) 0.0482(19) -0.0046(15) 0.0154(14) -0.0050(13) 
C16 0.0498(18) 0.0389(17) 0.0387(17) 0.0175(14) 0.0124(14) 0.0055(14) 
C7 0.070(2) 0.0349(18) 0.064(2) -0.0111(16) 0.0377(19) 0.0049(16) 
C11 0.147(5) 0.127(5) 0.039(2) -0.013(3) -0.005(3) 0.069(4) 
C40 0.065(2) 0.0296(16) 0.0474(19) 0.0130(14) 0.0171(16) 0.0233(15) 
C104 0.080(3) 0.0402(18) 0.0358(17) 0.0060(15) 0.0273(17) 0.0206(17) 
C43 0.0539(19) 0.0285(16) 0.0422(18) -0.0018(13) -0.0030(15) -0.0004(13) 
C28 0.0439(17) 0.0450(18) 0.0290(15) -0.0096(13) 0.0058(13) 0.0099(14) 
C17 0.0438(17) 0.0328(16) 0.0437(18) 0.0087(13) 0.0073(14) -0.0010(13) 
C22 0.0445(17) 0.0362(16) 0.0296(15) 0.0020(12) -0.0014(12) 0.0040(13) 
C33 0.0373(17) 0.060(2) 0.053(2) 0.0039(17) 0.0016(15) -0.0003(15) 
C4 0.0344(18) 0.093(3) 0.0408(19) 0.0200(19) 0.0164(14) 0.0271(19) 
C35 0.0325(16) 0.056(2) 0.0450(18) -0.0002(15) 0.0041(13) -0.0007(14) 
C10 0.0275(15) 0.0468(19) 0.0526(19) -0.0027(15) 0.0039(13) -0.0042(13) 
C44 0.049(2) 0.157(5) 0.074(3) 0.022(3) 0.002(2) 0.001(3) 
C36 0.0483(19) 0.052(2) 0.051(2) 0.0180(16) 0.0094(15) -0.0005(15) 
C41 0.069(2) 0.0231(15) 0.0412(17) 0.0021(13) 0.0103(16) 0.0084(14) 
C5 0.052(2) 0.066(2) 0.0431(19) 0.0081(16) 0.0238(16) 0.0294(18) 
C23 0.075(3) 0.045(2) 0.050(2) -0.0074(16) 0.0095(18) 0.0053(18) 
C24 0.0407(19) 0.055(2) 0.083(3) -0.005(2) -0.0027(18) -0.0010(16) 
C107 0.0392(17) 0.0442(18) 0.0471(19) -0.0019(15) -0.0014(14) -0.0053(14) 
C109 0.0346(17) 0.066(2) 0.049(2) 0.0058(17) 0.0117(14) -0.0037(15) 
C48 0.0354(16) 0.055(2) 0.0403(17) 0.0128(15) 0.0036(13) 0.0085(14) 
C21 0.081(3) 0.060(2) 0.053(2) -0.0149(19) -0.009(2) 0.026(2) 
C3 0.0267(15) 0.076(2) 0.0398(18) 0.0130(17) 0.0050(13) 0.0043(15) 
C20 0.050(2) 0.096(3) 0.051(2) -0.007(2) -0.0060(17) 0.019(2) 
C8 0.078(3) 0.075(3) 0.165(6) 0.062(4) -0.067(4) -0.019(3) 
C12 0.259(9) 0.058(3) 0.058(3) -0.006(2) 0.007(4) -0.008(4) 
C9 0.153(5) 0.041(2) 0.086(3) 0.008(2) -0.042(3) 0.017(3) 
C45 0.085(3) 0.066(3) 0.058(2) -0.021(2) -0.018(2) 0.004(2) 
C32 0.052(2) 0.049(2) 0.181(6) 0.023(3) -0.004(3) -0.0044(19) 
 
_geom_special_details 
; 
 All esds (except the esd in the dihedral angle between two l.s. planes) 
 are estimated using the full covariance matrix.  The cell esds are taken 
 into account individually in the estimation of esds in distances, angles 
 and torsion angles; correlations between esds in cell parameters are only 
 used when they are defined by crystal symmetry.  An approximate (isotropic) 
 treatment of cell esds is used for estimating esds involving l.s. planes. 
; 
 
loop_ 
 _geom_bond_atom_site_label_1 
 _geom_bond_atom_site_label_2 
 _geom_bond_distance 
 _geom_bond_site_symmetry_2 
 _geom_bond_publ_flag 
Cu2 N3 1.882(2) . ? 
Cu2 C101 1.957(3) . ? 
Cu2 Cu3 2.4254(4) . ? 
Cu2 Cu1 2.6915(4) . ? 
Cu3 N6 1.893(2) . ? 
Cu3 C101 1.976(3) . ? 
Cu3 Cu1 2.7333(4) . ? 
Cu1 N4 1.883(2) . ? 
Cu1 N1 1.894(2) . ? 
N4 N5 1.309(3) . ? 
N4 C25 1.445(3) . ? 
N5 N6 1.300(3) . ? 
N2 N1 1.299(3) . ? 
N2 N3 1.299(3) . ? 
C106 C105 1.394(4) . ? 
C106 C101 1.417(4) . ? 
C106 C109 1.503(5) . ? 
N3 C13 1.444(3) . ? 
N1 C1 1.436(3) . ? 
N6 C37 1.446(3) . ? 
C101 C102 1.420(4) . ? 
C13 C14 1.399(4) . ? 
C13 C18 1.405(4) . ? 
C25 C30 1.402(4) . ? 
C25 C26 1.409(4) . ? 
C1 C2 1.404(4) . ? 
C1 C6 1.405(4) . ? 
C30 C29 1.388(4) . ? 
C30 C34 1.518(4) . ? 
C2 C3 1.400(4) . ? 
C2 C10 1.521(5) . ? 
C26 C27 1.393(4) . ? 
C26 C31 1.516(4) . ? 
C42 C37 1.398(4) . ? 
C42 C41 1.404(4) . ? 
C42 C43 1.518(4) . ? 
C18 C17 1.390(4) . ? 
C18 C19 1.521(4) . ? 
C108 C104 1.519(5) . ? 
C108 H10A 0.9800 . ? 
C108 H10B 0.9800 . ? 
C108 H10C 0.9800 . ? 
C38 C39 1.392(4) . ? 
C38 C37 1.420(4) . ? 
C38 C46 1.520(4) . ? 
C29 C28 1.390(4) . ? 
C29 H29 0.9500 . ? 
C47 C46 1.526(4) . ? 
C47 H47A 0.9800 . ? 
C47 H47B 0.9800 . ? 
C47 H47C 0.9800 . ? 
C34 C36 1.524(4) . ? 
C34 C35 1.533(4) . ? 
C34 H34 1.0000 . ? 
C14 C15 1.407(4) . ? 
C14 C22 1.511(4) . ? 
C102 C103 1.384(4) . ? 
C102 C107 1.513(4) . ? 
C27 C28 1.378(5) . ? 
C27 H27 0.9500 . ? 
C19 C20 1.510(5) . ? 
C19 C21 1.519(5) . ? 
C19 H19 1.0000 . ? 
C46 C48 1.530(4) . ? 
C46 H46 1.0000 . ? 
C6 C5 1.396(4) . ? 
C6 C7 1.511(5) . ? 
C39 C40 1.378(5) . ? 
C39 H39 0.9500 . ? 
C103 C104 1.383(5) . ? 
C103 H103 0.9500 . ? 
C105 C104 1.373(5) . ? 
C105 H105 0.9500 . ? 
C15 C16 1.368(5) . ? 
C15 H15 0.9500 . ? 
C31 C32 1.486(6) . ? 
C31 C33 1.505(5) . ? 
C31 H31 1.0000 . ? 
C16 C17 1.375(5) . ? 
C16 H16 0.9500 . ? 
C7 C8 1.499(7) . ? 
C7 C9 1.520(5) . ? 
C7 H7 1.0000 . ? 
C11 C10 1.494(6) . ? 
C11 H11A 0.9800 . ? 
C11 H11B 0.9800 . ? 
C11 H11C 0.9800 . ? 
C40 C41 1.373(5) . ? 
C40 H40 0.9500 . ? 
C43 C45 1.523(5) . ? 
C43 C44 1.524(6) . ? 
C43 H43 1.0000 . ? 
C28 H28 0.9500 . ? 
C17 H17 0.9500 . ? 
C22 C23 1.519(5) . ? 
C22 C24 1.531(5) . ? 
C22 H22 1.0000 . ? 
C33 H33A 0.9800 . ? 
C33 H33B 0.9800 . ? 
C33 H33C 0.9800 . ? 
C4 C5 1.372(6) . ? 
C4 C3 1.374(5) . ? 
C4 H4 0.9500 . ? 
C35 H35A 0.9800 . ? 
C35 H35B 0.9800 . ? 
C35 H35C 0.9800 . ? 
C10 C12 1.491(7) . ? 
C10 H10 1.0000 . ? 
C44 H44A 0.9800 . ? 
C44 H44B 0.9800 . ? 
C44 H44C 0.9800 . ? 
C36 H36A 0.9800 . ? 
C36 H36B 0.9800 . ? 
C36 H36C 0.9800 . ? 
C41 H41 0.9500 . ? 
C5 H5A 0.9500 . ? 
C23 H23A 0.9800 . ? 
C23 H23B 0.9800 . ? 
C23 H23C 0.9800 . ? 
C24 H24A 0.9800 . ? 
C24 H24B 0.9800 . ? 
C24 H24C 0.9800 . ? 
C107 H10D 0.9800 . ? 
C107 H10E 0.9800 . ? 
C107 H10F 0.9800 . ? 
C109 H10G 0.9800 . ? 
C109 H10H 0.9800 . ? 
C109 H10I 0.9800 . ? 
C48 H48A 0.9800 . ? 
C48 H48B 0.9800 . ? 
C48 H48C 0.9800 . ? 
C21 H21A 0.9800 . ? 
C21 H21B 0.9800 . ? 
C21 H21C 0.9800 . ? 
C3 H3 0.9500 . ? 
C20 H20A 0.9800 . ? 
C20 H20B 0.9800 . ? 
C20 H20C 0.9800 . ? 
C8 H8A 0.9800 . ? 
C8 H8B 0.9800 . ? 
C8 H8C 0.9800 . ? 
C12 H12A 0.9800 . ? 
C12 H12B 0.9800 . ? 
C12 H12C 0.9800 . ? 
C9 H9A 0.9800 . ? 
C9 H9B 0.9800 . ? 
C9 H9C 0.9800 . ? 
C45 H45A 0.9800 . ? 
C45 H45B 0.9800 . ? 
C45 H45C 0.9800 . ? 
C32 H32A 0.9800 . ? 
C32 H32B 0.9800 . ? 
C32 H32C 0.9800 . ? 
 
loop_ 
 _geom_angle_atom_site_label_1 
 _geom_angle_atom_site_label_2 
 _geom_angle_atom_site_label_3 
 _geom_angle 
 _geom_angle_site_symmetry_1 
 _geom_angle_site_symmetry_3 
 _geom_angle_publ_flag 
N3 Cu2 C101 160.08(10) . . ? 
N3 Cu2 Cu3 146.77(7) . . ? 
C101 Cu2 Cu3 52.29(7) . . ? 
N3 Cu2 Cu1 82.45(6) . . ? 
C101 Cu2 Cu1 115.83(8) . . ? 
Cu3 Cu2 Cu1 64.331(12) . . ? 
N6 Cu3 C101 163.42(10) . . ? 
N6 Cu3 Cu2 144.40(7) . . ? 
C101 Cu3 Cu2 51.58(7) . . ? 
N6 Cu3 Cu1 83.18(6) . . ? 
C101 Cu3 Cu1 113.38(7) . . ? 
Cu2 Cu3 Cu1 62.562(12) . . ? 
N4 Cu1 N1 154.80(9) . . ? 
N4 Cu1 Cu2 127.09(6) . . ? 
N1 Cu1 Cu2 77.45(6) . . ? 
N4 Cu1 Cu3 79.06(6) . . ? 
N1 Cu1 Cu3 125.74(7) . . ? 
Cu2 Cu1 Cu3 53.107(10) . . ? 
N5 N4 C25 111.22(19) . . ? 
N5 N4 Cu1 132.00(17) . . ? 
C25 N4 Cu1 116.66(15) . . ? 
N6 N5 N4 114.9(2) . . ? 
N1 N2 N3 114.42(19) . . ? 
C105 C106 C101 120.1(3) . . ? 
C105 C106 C109 119.1(3) . . ? 
C101 C106 C109 120.8(3) . . ? 
N2 N3 C13 113.24(19) . . ? 
N2 N3 Cu2 123.01(16) . . ? 
C13 N3 Cu2 120.28(16) . . ? 
N2 N1 C1 112.39(19) . . ? 
N2 N1 Cu1 129.51(17) . . ? 
C1 N1 Cu1 117.51(16) . . ? 
N5 N6 C37 112.26(19) . . ? 
N5 N6 Cu3 126.60(16) . . ? 
C37 N6 Cu3 120.17(16) . . ? 
C106 C101 C102 117.6(2) . . ? 
C106 C101 Cu2 110.6(2) . . ? 
C102 C101 Cu2 118.89(19) . . ? 
C106 C101 Cu3 116.31(19) . . ? 
C102 C101 Cu3 110.62(19) . . ? 
Cu2 C101 Cu3 76.13(9) . . ? 
C14 C13 C18 122.0(2) . . ? 
C14 C13 N3 118.9(2) . . ? 
C18 C13 N3 119.0(2) . . ? 
C30 C25 C26 122.1(2) . . ? 
C30 C25 N4 118.1(2) . . ? 
C26 C25 N4 119.7(2) . . ? 
C2 C1 C6 122.0(2) . . ? 
C2 C1 N1 117.4(2) . . ? 
C6 C1 N1 120.5(3) . . ? 
C29 C30 C25 117.9(2) . . ? 
C29 C30 C34 121.3(2) . . ? 
C25 C30 C34 120.8(2) . . ? 
C3 C2 C1 117.8(3) . . ? 
C3 C2 C10 120.8(3) . . ? 
C1 C2 C10 121.3(2) . . ? 
C27 C26 C25 117.5(3) . . ? 
C27 C26 C31 121.3(3) . . ? 
C25 C26 C31 121.2(2) . . ? 
C37 C42 C41 117.7(3) . . ? 
C37 C42 C43 122.3(2) . . ? 
C41 C42 C43 120.0(3) . . ? 
C17 C18 C13 117.7(3) . . ? 
C17 C18 C19 120.7(3) . . ? 
C13 C18 C19 121.6(2) . . ? 
C104 C108 H10A 109.5 . . ? 
C104 C108 H10B 109.5 . . ? 
H10A C108 H10B 109.5 . . ? 
C104 C108 H10C 109.5 . . ? 
H10A C108 H10C 109.5 . . ? 
H10B C108 H10C 109.5 . . ? 
C39 C38 C37 117.0(3) . . ? 
C39 C38 C46 121.5(3) . . ? 
C37 C38 C46 121.5(2) . . ? 
C30 C29 C28 121.1(3) . . ? 
C30 C29 H29 119.5 . . ? 
C28 C29 H29 119.5 . . ? 
C42 C37 C38 122.0(2) . . ? 
C42 C37 N6 117.6(2) . . ? 
C38 C37 N6 120.3(2) . . ? 
C46 C47 H47A 109.5 . . ? 
C46 C47 H47B 109.5 . . ? 
H47A C47 H47B 109.5 . . ? 
C46 C47 H47C 109.5 . . ? 
H47A C47 H47C 109.5 . . ? 
H47B C47 H47C 109.5 . . ? 
C30 C34 C36 110.7(2) . . ? 
C30 C34 C35 113.4(2) . . ? 
C36 C34 C35 110.8(3) . . ? 
C30 C34 H34 107.2 . . ? 
C36 C34 H34 107.2 . . ? 
C35 C34 H34 107.2 . . ? 
C13 C14 C15 117.2(3) . . ? 
C13 C14 C22 122.6(2) . . ? 
C15 C14 C22 120.2(3) . . ? 
C103 C102 C101 119.8(3) . . ? 
C103 C102 C107 119.2(3) . . ? 
C101 C102 C107 121.0(3) . . ? 
C28 C27 C26 121.4(3) . . ? 
C28 C27 H27 119.3 . . ? 
C26 C27 H27 119.3 . . ? 
C20 C19 C21 111.6(3) . . ? 
C20 C19 C18 111.0(3) . . ? 
C21 C19 C18 111.8(3) . . ? 
C20 C19 H19 107.4 . . ? 
C21 C19 H19 107.4 . . ? 
C18 C19 H19 107.4 . . ? 
C38 C46 C47 111.2(2) . . ? 
C38 C46 C48 114.4(2) . . ? 
C47 C46 C48 109.0(2) . . ? 
C38 C46 H46 107.3 . . ? 
C47 C46 H46 107.3 . . ? 
C48 C46 H46 107.3 . . ? 
C5 C6 C1 117.3(3) . . ? 
C5 C6 C7 121.1(3) . . ? 
C1 C6 C7 121.5(3) . . ? 
C40 C39 C38 121.8(3) . . ? 
C40 C39 H39 119.1 . . ? 
C38 C39 H39 119.1 . . ? 
C104 C103 C102 122.3(3) . . ? 
C104 C103 H103 118.9 . . ? 
C102 C103 H103 118.9 . . ? 
C104 C105 C106 121.8(3) . . ? 
C104 C105 H105 119.1 . . ? 
C106 C105 H105 119.1 . . ? 
C16 C15 C14 121.4(3) . . ? 
C16 C15 H15 119.3 . . ? 
C14 C15 H15 119.3 . . ? 
C32 C31 C33 111.8(3) . . ? 
C32 C31 C26 111.2(3) . . ? 
C33 C31 C26 113.5(3) . . ? 
C32 C31 H31 106.6 . . ? 
C33 C31 H31 106.6 . . ? 
C26 C31 H31 106.6 . . ? 
C15 C16 C17 120.3(3) . . ? 
C15 C16 H16 119.9 . . ? 
C17 C16 H16 119.9 . . ? 
C8 C7 C6 110.1(3) . . ? 
C8 C7 C9 108.0(4) . . ? 
C6 C7 C9 114.4(4) . . ? 
C8 C7 H7 108.0 . . ? 
C6 C7 H7 108.0 . . ? 
C9 C7 H7 108.0 . . ? 
C10 C11 H11A 109.5 . . ? 
C10 C11 H11B 109.5 . . ? 
H11A C11 H11B 109.5 . . ? 
C10 C11 H11C 109.5 . . ? 
H11A C11 H11C 109.5 . . ? 
H11B C11 H11C 109.5 . . ? 
C41 C40 C39 120.3(3) . . ? 
C41 C40 H40 119.9 . . ? 
C39 C40 H40 119.9 . . ? 
C105 C104 C103 118.4(3) . . ? 
C105 C104 C108 119.9(4) . . ? 
C103 C104 C108 121.7(4) . . ? 
C42 C43 C45 112.3(3) . . ? 
C42 C43 C44 110.5(3) . . ? 
C45 C43 C44 110.3(4) . . ? 
C42 C43 H43 107.8 . . ? 
C45 C43 H43 107.8 . . ? 
C44 C43 H43 107.9 . . ? 
C27 C28 C29 120.0(3) . . ? 
C27 C28 H28 120.0 . . ? 
C29 C28 H28 120.0 . . ? 
C16 C17 C18 121.3(3) . . ? 
C16 C17 H17 119.3 . . ? 
C18 C17 H17 119.3 . . ? 
C14 C22 C23 112.1(3) . . ? 
C14 C22 C24 110.1(3) . . ? 
C23 C22 C24 111.8(3) . . ? 
C14 C22 H22 107.5 . . ? 
C23 C22 H22 107.5 . . ? 
C24 C22 H22 107.5 . . ? 
C31 C33 H33A 109.5 . . ? 
C31 C33 H33B 109.5 . . ? 
H33A C33 H33B 109.5 . . ? 
C31 C33 H33C 109.5 . . ? 
H33A C33 H33C 109.5 . . ? 
H33B C33 H33C 109.5 . . ? 
C5 C4 C3 120.9(3) . . ? 
C5 C4 H4 119.5 . . ? 
C3 C4 H4 119.5 . . ? 
C34 C35 H35A 109.5 . . ? 
C34 C35 H35B 109.5 . . ? 
H35A C35 H35B 109.5 . . ? 
C34 C35 H35C 109.5 . . ? 
H35A C35 H35C 109.5 . . ? 
H35B C35 H35C 109.5 . . ? 
C12 C10 C11 109.5(4) . . ? 
C12 C10 C2 113.1(3) . . ? 
C11 C10 C2 112.5(3) . . ? 
C12 C10 H10 107.1 . . ? 
C11 C10 H10 107.1 . . ? 
C2 C10 H10 107.1 . . ? 
C43 C44 H44A 109.5 . . ? 
C43 C44 H44B 109.5 . . ? 
H44A C44 H44B 109.5 . . ? 
C43 C44 H44C 109.5 . . ? 
H44A C44 H44C 109.5 . . ? 
H44B C44 H44C 109.5 . . ? 
C34 C36 H36A 109.5 . . ? 
C34 C36 H36B 109.5 . . ? 
H36A C36 H36B 109.5 . . ? 
C34 C36 H36C 109.5 . . ? 
H36A C36 H36C 109.5 . . ? 
H36B C36 H36C 109.5 . . ? 
C40 C41 C42 121.1(3) . . ? 
C40 C41 H41 119.4 . . ? 
C42 C41 H41 119.4 . . ? 
C4 C5 C6 121.3(3) . . ? 
C4 C5 H5A 119.4 . . ? 
C6 C5 H5A 119.4 . . ? 
C22 C23 H23A 109.5 . . ? 
C22 C23 H23B 109.5 . . ? 
H23A C23 H23B 109.5 . . ? 
C22 C23 H23C 109.5 . . ? 
H23A C23 H23C 109.5 . . ? 
H23B C23 H23C 109.5 . . ? 
C22 C24 H24A 109.5 . . ? 
C22 C24 H24B 109.5 . . ? 
H24A C24 H24B 109.5 . . ? 
C22 C24 H24C 109.5 . . ? 
H24A C24 H24C 109.5 . . ? 
H24B C24 H24C 109.5 . . ? 
C102 C107 H10D 109.5 . . ? 
C102 C107 H10E 109.5 . . ? 
H10D C107 H10E 109.5 . . ? 
C102 C107 H10F 109.5 . . ? 
H10D C107 H10F 109.5 . . ? 
H10E C107 H10F 109.5 . . ? 
C106 C109 H10G 109.5 . . ? 
C106 C109 H10H 109.5 . . ? 
H10G C109 H10H 109.5 . . ? 
C106 C109 H10I 109.5 . . ? 
H10G C109 H10I 109.5 . . ? 
H10H C109 H10I 109.5 . . ? 
C46 C48 H48A 109.5 . . ? 
C46 C48 H48B 109.5 . . ? 
H48A C48 H48B 109.5 . . ? 
C46 C48 H48C 109.5 . . ? 
H48A C48 H48C 109.5 . . ? 
H48B C48 H48C 109.5 . . ? 
C19 C21 H21A 109.5 . . ? 
C19 C21 H21B 109.5 . . ? 
H21A C21 H21B 109.5 . . ? 
C19 C21 H21C 109.5 . . ? 
H21A C21 H21C 109.5 . . ? 
H21B C21 H21C 109.5 . . ? 
C4 C3 C2 120.5(3) . . ? 
C4 C3 H3 119.7 . . ? 
C2 C3 H3 119.7 . . ? 
C19 C20 H20A 109.5 . . ? 
C19 C20 H20B 109.5 . . ? 
H20A C20 H20B 109.5 . . ? 
C19 C20 H20C 109.5 . . ? 
H20A C20 H20C 109.5 . . ? 
H20B C20 H20C 109.5 . . ? 
C7 C8 H8A 109.5 . . ? 
C7 C8 H8B 109.5 . . ? 
H8A C8 H8B 109.5 . . ? 
C7 C8 H8C 109.5 . . ? 
H8A C8 H8C 109.5 . . ? 
H8B C8 H8C 109.5 . . ? 
C10 C12 H12A 109.5 . . ? 
C10 C12 H12B 109.5 . . ? 
H12A C12 H12B 109.5 . . ? 
C10 C12 H12C 109.5 . . ? 
H12A C12 H12C 109.5 . . ? 
H12B C12 H12C 109.5 . . ? 
C7 C9 H9A 109.5 . . ? 
C7 C9 H9B 109.5 . . ? 
H9A C9 H9B 109.5 . . ? 
C7 C9 H9C 109.5 . . ? 
H9A C9 H9C 109.5 . . ? 
H9B C9 H9C 109.5 . . ? 
C43 C45 H45A 109.5 . . ? 
C43 C45 H45B 109.5 . . ? 
H45A C45 H45B 109.5 . . ? 
C43 C45 H45C 109.5 . . ? 
H45A C45 H45C 109.5 . . ? 
H45B C45 H45C 109.5 . . ? 
C31 C32 H32A 109.5 . . ? 
C31 C32 H32B 109.5 . . ? 
H32A C32 H32B 109.5 . . ? 
C31 C32 H32C 109.5 . . ? 
H32A C32 H32C 109.5 . . ? 
H32B C32 H32C 109.5 . . ? 
 
_diffrn_measured_fraction_theta_max    0.955 
_diffrn_reflns_theta_full              27.56 
_diffrn_measured_fraction_theta_full   0.955 
_refine_diff_density_max    0.961 
_refine_diff_density_min   -0.515 
_refine_diff_density_rms    0.071 

#===END
